# Supplementary material for: Towards ice thickness inversion: an evaluation of global DEMs by ICESat-2 in the glacierized Tibetan Plateau
Source: Copernicus journal article supplement (doi:10.5194/tc-2021-197), 2021-07-13
Supplement: Supplementary file [file tc-2021-197-AC2-supplement.pdf]

Comments on

“Towards ice thickness inversion: an evaluation of global DEMs by ICESat-2 in the glacierized Tibetan Plateau” by Wenfeng Chen et al.

Referee #2

Overview

This paper by Chen et al. presents a method to evaluate existing regional scale DEMs using the recently available ICESat-2 elevation product. The DEMs are then applied to model the ice thickness of glaciers in the Tibetan Plateau region. The quality of the inversion results is then analyzed to prove the effectiveness of the ICESat-2 based evaluation. The paper is generally well structured. It showed that the ICESat-2 data provided a comparison dataset for selecting an optimal DEM that can be used as input for ice thickness inversion. This work should be useful to researchers of The Cryosphere community. The paper needs to be revised according to the following major and minor comments.

The manuscript needs a serious improvement of both formal English writing and scientific meaning.

**Response:** We are grateful to the anonymous reviewer for the constructive comments on our manuscript. We have carefully addressed all the comments below. The English are checked by a native English speaker. We have added some content to improve the scientific meaning.

“This conclusion is of significance for ice thickness inversion models using DEMs in TP. However, it should be noted that the result may be not suitable for studies in other glacierized mountainous regions. Because various errors exist in DEMs, such as speckle noise, stripe noise and absolute bias; they behave differently across the Earth (Yamazaki et al. 2017; Takaku et al. 2020). But our method to assess the accuracy of DEMs is repeatable in different regions, combined with the recently released glacier elevation change data on Earth (Hugonnet et al. 2021). What’s more, benefiting from the high accuracy and dense coverage of ICESat-2 data, the quality of DEMs can also be improved as similar as the production of MERIT (Yamazaki et al. 2017). For example, the misregistration in DEMs could be corrected and terrain-related errors could be reduced by unitizing the relation of difference against slope, aspect and elevation in Fig. 6.”

”

Major comments

1. The subtitles in the Data and Methods sections need to be improved to reflect the actual contents and be logic (ICESat-2 elevation data referenced, DEMs evaluated, .....)

**Response:** The subtitles are revised and organized to reflect the actual contents.

2.1 Descriptions of ICESat-2 elevation data referenced;

2.2 Descriptions of global-scale DEMs evaluated;

2.3 Ice thickness inversion method;

2.4 Accuracy assessment method;

2. The ICESat-2 data were used to evaluate DEMs. It should be discussed how the DEMs were generated, including data sources, time periods, and uncertainties. During the time differences between the ICESat-2 data and MEDs there may be glacier surface changes that may affect the evaluation. If this is not considered, would this also affect the thickness inversion results?

**Response:** We add more details about how the six DEMs are generated. Detailed information is also summarized in Table 1.

Yes, glacier surface change affects the evaluation. We considered it in the analysis in Section 3.3 and discussed it in section 4.1. We also added one paragraph in Section 2.4 to describe how we solve the influence from glacier surface change on evaluation.

“Glacier surface elevation changed at  $-21 - 17\text{m/yr}$  over the TP during 2000-2018 (Shean et al. 2020). Therefore, the disparity of acquiring date between ICESat-2 and six DEM (Table 1) could introduce large error due to the glacier dynamic. TanDEM-X and AW3D30 are acquired in different months and years (Table 1), it's hard to analyse the impact of glacier dynamic on accuracy assessment. However, the other four DEMs are produced from NASA's Shuttle Radar Topography Mission during the 11-day mission in February 2000. We selected ICESat-2 data acquired in February 2019 and 2020. Then the glacier elevation dynamic magnitude during February 2000 and February 2019/2020 are subtracted from the selected ICESat-2 elevation based on the mean glacier elevation change data from Shean et al. (2020). By comparing the elevation from the four DEMs and adjust ICESat-2, we could exactly know the impacts on accuracy assessment from glacier dynamic.”

Glacier surface elevation change could also influence the inversion of ice thickness, especially when estimating glacier thickness in regional scale. Therefore, though AW3D30 with mixing acquiring dates exhibit a good accuracy assessment, we still suggest NASADEM is a best choice for ice-thickness estimates over the TP.

3. ICESat-2 Level-3A land-ice ATL06 product was used in this work. There should be a good understanding of the quality of this product itself, although a systematic calval may not have been performed in the glacierized Tibetan Plateau region. I would like to see even a general discussion in that regard. I suggest to add some relevant references in the Data section:

Brunt, K. M., Neumann, T. A., and Smith, B. E.: Assessment of ICESat-2 Ice Sheet Surface Heights, Based on Comparisons Over the Interior of the Antarctic Ice Sheet, *Geophys. Res. Lett.*, 46, 13072–13078, <https://doi.org/10.1029/2019GL084886>, 2019.

Brunt, K. M., Smith, B. E., Sutterley, T. C., Kurtz, N. T., and Neumann, T. A.: Comparisons of Satellite and Airborne Altimetry With Ground-Based Data From the Interior of the Antarctic Ice Sheet, *Geophys Res Lett*, 48, e2020GL090572 <https://doi.org/10.1029/2020GL090572>, 2021.

Li, R., Li, H., Hao, T., Qiao, G., Cui, H., He, Y., Hai, G., Xie, H., Cheng, Y., and Li, B.: Assessment of ICESat-2 ice surface elevations over the Chinese Antarctic Research Expedition (CHINARE) route, East Antarctica, based on coordinated multi-sensor observations, *The Cryosphere*, 15, 3083–3099, <https://doi.org/10.5194/tc-15-3083-2021>, 2021.

**Response:** We have added the above reference.

“The segment has a length of 40 m centered on reference points at 20-m intervals along the track. The ATL06 product has better than 5 cm height accuracy and better than 20 cm surface measurement precision in the Antarctic (Brunt et al. 2019,2020; Li et al. 2021) and Qilian Shan (Zhang et al. 2020).”

Elevation differences between crossovers formed by ICESat-2 tracks may be used for the elevation accuracy evaluation.

**Response:** We thanks for the reviewer’s suggestion. This is really a good idea for testing the performance of ICESat-2 in stable region. However, when we check the dates of point around crossover of ICESat-2 tracks, we find they are from different dates, so maybe it’s not easy to know whether this elevation difference is from glacier elevation change or the uncertainty of ICESat-2.

As ATL06 product comes from ATL03 photons grouped in 40 m segments, would ATL03 data provide more terrain details? This may be outside of the scope of this paper. However, a discussion of this potential would be helpful to the readers in their future research.

**Response:** We added these sentences in Section 2.1.

“ICESat-2 ATL03 and ATL06 product both can be used as elevation reference. ATL03 product has a spacing of ~0.7m and can provide more terrain details than ATL06 product. In this study, considering the resolution of global dem and compute cost, we select the ICESat-2 Level-3A land-ice ATL06 product as elevation reference.”

4. Based on your results, the accuracy of ICESat-2 data is better than the compared global-scale DEMs. Have you considered to use the ICESat-2 data to improve the quality of the DEMs, especially in areas where ICESat-2 along and across track data are available. Again, this may be considered as a future work

**Response:** Yes, that’s a good point. We added this in the discussion.

“What’s more, benefiting from the high accuracy and dense coverage of ICESat-2 data, quality of DEMs can also be improved as similar as the production of MERIT (Yamazaki et al. 2017). For examples, the misregistration in DEMs could be corrected and terrain-related errors could be reduced by unitizing the relation of difference against slope, aspect and elevation in Fig. 6.”

#### **Minor comments**

**Page 1, Line 11:** Replace “derived” with “derived from”.

**Response:** Corrected

**Page 1, Lines 12–14:** This sentence is awkwardly phrased. You may rephrase by separating it in to two sentences.

**Response:** Corrected

“However, the scarce in-situ measurements of glacier surface elevation limit the evaluation of DEM uncertainty. And hence influence of DEM uncertainty on ice-thickness modelling remains unclear over the glacierized area of the Tibetan Plateau (TP).”

**Page 1, Line 17:** Please be clear if it is the horizontal or vertical accuracy.

**Response:** it’s vertical accuracy. Corrected

**Page 1, Lines 23-24:** Change “one pixel” to one grid spacing.

**Response:** Corrected.

**Page 1, Lines 24-28:** These sentences are not communicating well. Please cut them to short and simple sentences.

**Response:** Corrected

Then, influence of six DEMs on four ice-thickness models: GlabTop2, Open Global Glacier Model (OGGM), Huss-Farinotti (HF), Ice Thickness Inversion Based on Velocity (ITIBOV) was intercompared. The results show that GlabTop2 is sensitive to the accuracy of both elevation and slope, while OGGM and HF are less sensitive to DEM quality and resolution, and ITIBOV is the most sensitive to slope accuracy.

Page 2, Lines 33 & 36: Change “km2 ”, “km3 ” to “km<sup>2</sup>”, “km<sup>3</sup>”.

**Response:** Corrected

Page 3, Line 87 and Page 4, Lines 107-108: When you mention ICESat-2 in these two places, please mention the cal-val efforts and introduce the most recent accuracy assessment results by Brunt et al. (2019, 2021) and Li et al. (2021).

**Response:** Corrected.

“MERIT which are derived from different sensors and have different resolutions, against ICESat-2 data which has been proven to have a high vertical accuracy and resolution (Brunt et al. 2019, 2021; Li et al. 2021)”

“The ATL06 product has better than 5 cm height accuracy and better than 20 cm surface measurement precision in the Antarctic (Brunt et al. 2019,2020; Li et al. 2021) and Qilian Shan (Zhang et al. 2020).”

Page 4, Line 95: Replace “intersecting” with “covering”.

**Response:** Corrected

Page 4, Line 105: ~17 m diameter is the design value. This value needs to be updated according to the new study: Magruder, L. A., Brunt, K. M., and Alonzo, M.: Early ICESat-2 on-orbit geolocation validation using ground-based corner cube retroreflectors, Remote Sensing, 12, 3653, <https://doi.org/10.3390/rs12213653>, 2020.

**Response:** Corrected.

“ICESat-2 ATLAS (Advanced Topographic Laser Altimeter System) emits a pulse every 0.7 m along the track covering a horizontal circular area with 0.5 m in vertical extent and ~17 m diameter. This design diameter value varied due to the photo-counting lidar technology and potentially the atmospheric conditions (Magruder et al. 2020).”

**Page 4, Line 106:** In addition to first-photon bias, transmit-pulse shape correction should be mentioned also

**Response:** Corrected.

“We used the ICESat-2 Level-3A land-ice ATL06 product. ATL06 heights are median-based heights derived from a linear-fit model over each segment corrected for first-photon bias and transmit-pulse shape.”

The ATL06 data provide slopes in along and across tracks. They are derived at different scales (along track with denser points and cross track with fewer points and longer separations). Have you considered the difference between these two

types of slopes?

**Response:** Here, the slope is derived from DEMs not the ICESat-2 product. We use this slope for error analysis at slope scale and misregistration analysis. In the origin design of this research, we plan to estimate the slope accuracy derived from DEMs based on the ICESat-2 along-track slope. But we found that the algorithms they calculated slope are totally different (Burrough and McDonell 1998; Smith et al. 2019)., so we didn't estimate this furtherly.

Burrough, P.A., & McDonell, R.A. (1998). Principles of Geographical Information Systems. *Oxford University Press, New York*, 190 pp.

Smith, B., Fricker, H.A., Holschuh, N., Gardner, A.S., Adusumilli, S., Brunt, K.M., Csatho, B., Harbeck, K., Huth, A., Neumann, T., Nilsson, J., & Siegfried, M.R. (2019). Land ice height-retrieval algorithm for NASA's ICESat-2 photon-counting laser altimeter. *Remote Sensing of Environment*, 233

Figure 2: "Difference in aspect and slope bins".

**Response:** Corrected.

Figure 2: Make different blue boxes into just blue color.

**Response:** Corrected.

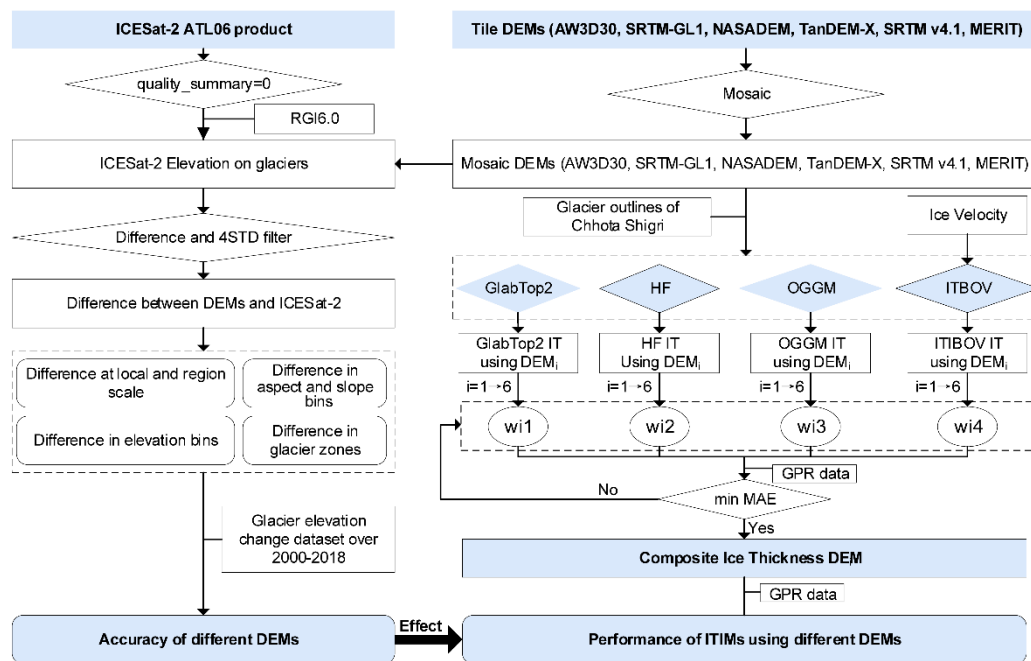

Page 6, Line 127: Please specify how severe is the gap situation and the effectiveness of gap filling

**Response:** We have added these sentences.

“Approximate 10 % of global land area, mainly in tropical rainforest areas and the polar areas, has voids mostly due to cloud or snow/ice covers constation in source imageries. Data gaps are filled with SRTM, ASTER GDEM v3, ArcticDEM v3, and TanDEM-X 90 (Takaku et al. 2020). After filling gaps, the accuracies in void-filled and void-free areas are nearly consistent (Takaku et al. 2020).”

Page 6, Line 135: All website links need to add the last visit date to ensure their availability

**Response:** We have added visit date of website links in Table 1.

**Page 8, Lines 160-162:** The sentence is unclear. Please rewrite.

**Response:** corrected.

“Four ice-thickness inversion models (GlabTop2, HF, OGGM, ITBOV) were used to estimate the glacier thickness. The Chhota Shigri Glacier located in western Himalaya with available GPR data (Fig.1) was selected as an example to evaluate the influence of DEM uncertainty on the ITIMs.”

**Page 10, Line 209:** Please justify your choice of 4-std of differences between ICESat-2 and DEMs for data filtering.

**Response:** We add these sentences.

“The four standard deviations (that is 4 std) was chosen to not only filter the differences between ICESat-2 and DEMs to exclude extreme outliers, but also keep most records in the further accuracy analysis. Ration of excluded outliers relative to record of each DEM is less than 1%.”

**Page 10, Lines 212 & 214:** “R2”

**Response:** Corrected.

**Page 11, Line 219:** “R2”

**Response:** Corrected.

**Figure 3 & Figure 4:** Why would RMSE in both figures be different? For example, for AW3D30 it is 13.4 m in Fig 3, but it is 34.9 m in Fig 4. Please make sure the data are consistent throughout the paper.

**Response:** The RMSE in Figure 3 and Figure 4 are different. ‘R2’, ‘RMSE’ and ‘Intercept’ are fit results when the slope coefficient is set to 1. In fact, the RMSE in Figure 3 should be equal to the STD in Figure 4. The intercept should be equal to the ME in Figure 4.

“The ME in the Himalaya is more negative than that in southeast Tibet”, but it is not clearly shown in Figure 5. Do you want to quantify it with numbers?

**Response:** The Figure 5 is updated. And the sentence is rewritten.

“The ME in southeast Tibet is more positive than that in the Himalaya”

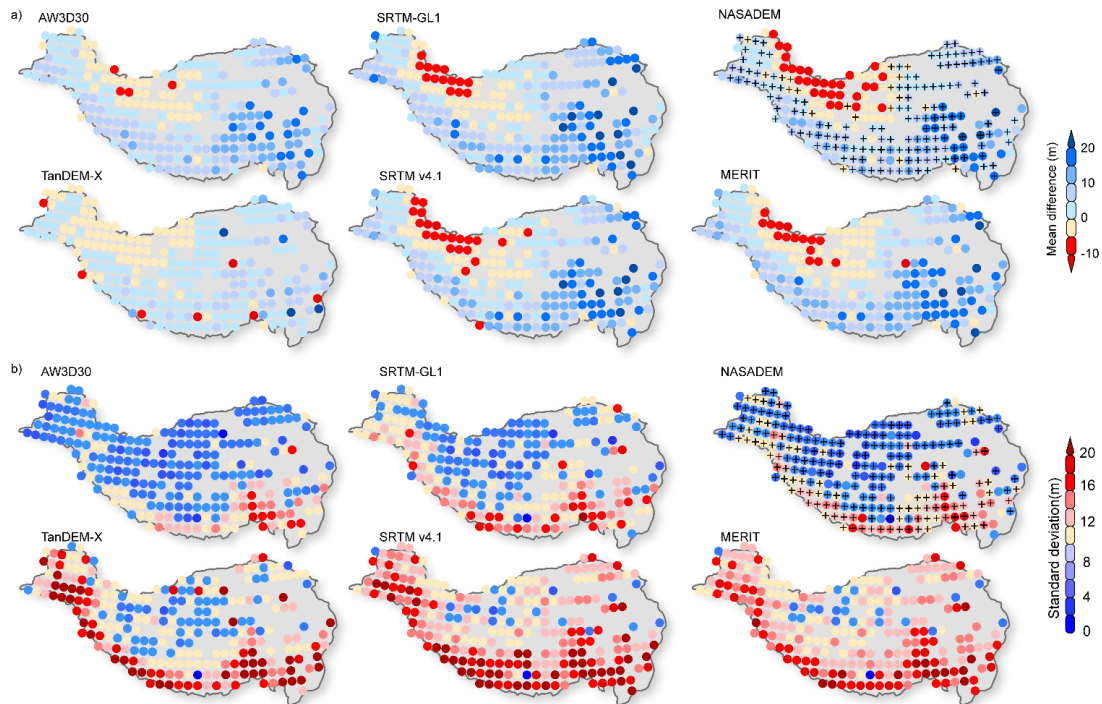

**Page 12, Line 243:** Please be clear about “spatially relevant”

**Response:** Corrected.

” Specifically, the STD of AW3D30 and NASADEM was minimum and has similar **spatial distribution.**”

Page 15, Line 278: The time of six DEMs is all earlier than the ICESat-2 data. As stated in the major comments, in addition to uncertainties would temporal changes of the glaciers also affect your evaluation efforts?

**Response:** Yes, the glacier elevation change could also influence the evaluation. We quantitatively estimate the influence from glacier elevation change in Section 3.3 and 4.1. Especially for glaciers in the ablation zone, the ME, MAE SD and RMSE are largely reduced for SRTM based DEMs (Table 3).

**Figure 6:** No significant information is presented in Fig 6(d). You may just deleted it.

**Response:** We used this Fig.6d here.

“For NASADEM and SRTM-GL1, the differences along the elevations show similar distribution and varied from  $-10$  to  $10$  m over the range  $4500-6500$  m, where measurements are concentrated (Fig. 6d);”

“The differences with aspect show contrasting features to the distribution of measurements in different aspects (Fig. 6d).”

“Though points in  $55^{\circ}-90^{\circ}$  slope region account for small fraction (Fig. 6d), almost half the points in the  $55^{\circ}-90^{\circ}$  slope region are identified as extreme outliers (Fig. 10a).”

**Page 16, Line 317:** Explain the numbers of “9, 3, 4, 3 and 1”.

**Response:** We refined this sentence and title of Table 2.

“Totals of 8, 7, 3 and 2 output achieved the minimum RMSE in profiles (Bold number in Table 2) by different ITIMs using AW3D30, NASADEM, TanDEM-X and SRTM-GL1, respectively.”

“Table 2 RMSE (m) of modelled ice thickness compared with ground penetrating radar (GPR)

measurements on each profile. Location of profiles are shown in Figure 1. Bold numbers denote the best model performance on each profile using different DEMs.”

The figure displays the proportion of outliers vs. slopes. Within the range of 55-90 degrees, the proportion is up to ~40-55% for six DEMs. This is a high percentage. Would you please discuss the reasons?

**Response:** We discussed in the section 4.2. We thought that the steep slope and intra-pixel effect should be attributed to this.

“Almost half the points in the 55°–90° slope region are identified as extreme outliers (Fig. 10a). Differences also show large discrepancies for all DEMs in the steeply sloping regions where voids and large errors are frequent (Falorni 2005). Steep slopes combined with low resolution led to variations in the spread of differences in Fig. 6b. Spreads of differences were larger on steep slopes for the 90-m DEMs than those of the 30-m DEMs. Intra-pixel variation aggravates this effect in steeply sloping regions (Uuemaa et al. 2020), lower resolution or reduced pixel DEMs smooth the terrain details and lead to inaccurate elevation compared with the 20-m footprint of ICESat-2 points. The spread and the number of outliers gradually increased with the slope, especially for the TanDEM-X case (Fig. 7b).”

**Page 21, Line 384:** “ICESat-2 elevation is ... higher in Fig. 11d”. This statement is not true in Fig.11d. Please describe the figure accurately and objectively

**Response:** Since the profile overlap seriously, we deleted this Figure 11.

**Page 22, Line 393:** Remove “will”.

**Response:** Corrected.

**Page 22-23, Lines 401-402:** Remove the sentence “Additionally, ... elevation”. The error of these two scatterings cannot influence the magnitude of the biased estimate of elevation you mentioned here.

**Response:** Corrected.

**Page 26, Line 449:** Explain how is this correction of sub-pixel misregistration performed.

**Response:** Corrected.

“According to the sinusoidal relationship between aspect and error differences between two DEMs (Van Niel et al. 2008), using the co-registration method in Nuth and Kääb (2011) and ICESat-2 points outside the glaciers, offset pixels relative to ICESat-2 in x- and y- direction at the 1°×1° grid scale were estimated by fitting method in MATLAB across the TP.”

**Page 27, Line 470:** Change “A +5° error” to “An error of +5°”.

**Response:** Corrected.

**Page 28, Lines 495-497:** I cannot get what you mean here. Rewrite it to make it clear.

**Response:** It’s repeated in this paragraph. So, it’s deleted.

**Page 29, Lines 527-529:** It is not clear what you want to say here. It is in the conclusions section. You need to be brief and direct. Please rewrite.

**Response:** Corrected. Some sentences are also deleted to make the conclusion section brief.

“The widely used GlabTop2 model is very sensitive to the accuracy of both elevation and slope; using



NASADEM as the input facilitated the best outcome.”

# Towards ice thickness inversion: an evaluation of global DEMs ~~by ICESat-2~~ in the glacierized Tibetan Plateau

Wenfeng Chen<sup>1,3</sup>, Tandong Yao<sup>1</sup>, Guoqing Zhang<sup>1</sup>, Fei Li<sup>1,3</sup>, Guoxiong Zheng<sup>2,3</sup>, Yushan Zhou<sup>1</sup>, Fenglin Xu<sup>1,3</sup>

<sup>1</sup> State Key Laboratory of Tibetan Plateau Earth System Science, Institute of Tibetan Plateau Research, Chinese Academy of Sciences, Beijing 100101, China

<sup>2</sup> Xinjiang Institute of Ecology and Geography, Chinese Academy of Sciences, Urumqi 830011, China

<sup>3</sup> University of Chinese Academy of Sciences, Beijing 100049, China

*Correspondence to:* Wenfeng Chen (chenwf@itpcas.ac.cn)

**Abstract.** Accurate estimates of regional ice thickness, which are generally produced by ice-thickness inversion models, are crucial for assessments of available freshwater resources and sea level rise. Digital elevation model (DEM) derived from surface topography of glaciers is a primary data source for such models. However, the scarce in-situ measurements of glacier surface elevation limit the evaluation of DEM uncertainty, ~~and~~ ~~And the~~ hence ~~its~~ influence of DEM uncertainty on ice-thickness modelling remains unclear over the glacierized area of the Tibetan Plateau (TP). Here, we examine the performance over the glacierized TP of six widely used and mainly global-scale DEMs: AW3D30 (30 m), SRTM-GL1 (30 m), NASADEM (30 m), TanDEM-X (90 m), SRTM v4.1 (90 m) and MERIT (90 m) by using-comparing with ICESat-2 laser altimetry data while considering the effects of glacier dynamics, terrain, and DEM misregistration. The results reveal NASADEM as the best performer in vertical accuracy, with a small mean error (ME) of ~~-1.00.9 m~~ and a root mean squared error (RMSE) of 12.6 m. ~~A systematic vertical offset existed in, followed by~~ AW3D30 (~~-35.32.6 ME and 34.11.39 m RMSE~~), ~~although it had a similar relative accuracy to NASADEM (~13 m STD)~~. TanDEM-X also performs well (~~-0.1 m~~ ME and 15.1 m RMSE), but suffers from serious errors and outliers on steep slopes. SRTM-based DEMs (SRTM-GL1, SRTM v4.1, and MERIT) (~~all -36 m~~ 13.5-17.0 m RMSE) had an inferior performance to NASADEM. Errors in the six DEMs increased from the south-facing to the north-facing aspect and become larger with increasing slope. Misregistration of DEMs relative to ICESat-2 footprint in most glacier areas is small (less than one pixelgrid spacing). ~~Then, the An intercomparison influence of six DEMs on~~ of four ice-thickness models: GlabTop2, Open Global Glacier Model (OGGM), Huss-Farinotti (HF), Ice Thickness Inversion Based on Velocity (ITIBOV) was intercompared. The results show that GlabTop2 is sensitive to the accuracy of both elevation and slope, while OGGM and HF are less sensitive to DEM quality and resolution, and ITIBOV is the most sensitive to slope accuracy. Considering the necessity of DEMs with consistency ~~consistent acquisition dates~~ Considering the inconsistency of DEMs acquisition dates, NASADEM would beis a the best choice for ice-thickness estimates over the TP, ~~followed by~~ AW3D30, and TanDEM X (if steep and high elevation terrain can be avoided). Our assessment figures out the performances of mainly global DEMs over the glacierized TP. This study not only avails the glacier thickness estimation with ice thickness inversion models, but also offered-offers references for other cryosphere studies using DEM.

## 1 Introduction

35 The Tibetan Plateau (TP), which includes the Pamir, Hindu Kush, Karakoram, Himalaya, and Tibet regions, covers an area of  
~3 million km<sup>2</sup> and has a mean elevation of more than 4000 m a.s.l. (Fig. 1). It accounts for more than 82% of the Earth's land  
surface area above 4000 m a.s.l. (Fielding et al. 1994), and is often referred to as the Third Pole of Earth or the Asian Water  
Tower (Yao et al. 2012) due to its high elevation and abundant water resources in the form of glaciers, snow, permafrost, lakes,  
and rivers. The TP has a glacierized area of  $\sim 8.3 \times 10^4$  km<sup>2</sup> (RGI Consortium, 2017) with an ice volume of  $\sim 6.2 \times 10^3$  km<sup>3</sup>  
40 (Farinotti et al. 2019), mainly distributed in the Karakoram and Himalaya regions.

Ice thickness is a crucial parameter for assessing the contribution of glaciers to global sea level rise (Kraaijenbrink et al.  
2017), quantifying regional water availability (Huss and Hock 2018; Immerzeel et al. 2020), and evaluating cryosphere-related  
hazards (Linsbauer et al. 2016; Zheng et al. 2021). In the TP, owing to the lack of in-situ ice thickness measurements (Welty  
et al. 2020), regional glacier thickness is mainly estimated by ice-thickness inversion models (ITIMs) using [open-open](#)-access  
45 digital elevation models (DEMs) (Farinotti et al. 2009; Farinotti et al. 2019; Frey et al. 2014). The DEM is a fundamental part  
of most regional ITIMs (Farinotti et al. 2017), and is often used to determine center flow lines (Maussion et al. 2019), shear  
stress (Frey et al. 2014; Wu et al. 2020), apparent mass balance (Farinotti et al. 2009), and for ice-thickness interpolation (Huss  
and Farinotti 2012). In addition to its use in ITIMs, the DEM has been an essential input for a wide range of TP glaciology  
studies, such as glacier inventory (Bhambri et al. 2011; Frey et al. 2012; Ke et al. 2016; Mölg et al. 2018), glacier mass change  
50 (Brun et al. 2017; Shean et al. 2020; Zhou et al. 2018), glacier related disasters (Allen et al. 2019; Käab et al. 2018; Zhang et  
al. 2019) and projections of glacier or glacial lake evolution (Kaser et al. 2010; Kraaijenbrink et al. 2017; Zheng et al. 2021).  
The uncertainty in the DEMs can lead to different ITIM outcomes (Frey and Paul 2012; Fujita et al. 2017; Furian et al. 2021;  
Käab 2005), especially for those ITIMs in which the DEM is a crucial input. For example, the sensitivity of the glacier bed  
topography (GlabTop) model to slope increases for shallower slopes (Paul and Linsbauer 2012), and [an slope overestimated](#)  
55 [of slope](#) by ~10% would result in an underestimation of ice thickness of ~32% (Linsbauer et al. 2012). [Therefore, the DEM](#)  
[grid resolution could influence the thickness estimation from GlabTop, more detailed slope information could be provided by](#)  
[higher resolution DEM.](#) Localized [elevation](#) errors and data gaps could affect the estimated ice thickness by 5–25% (Huss and  
Farinotti 2012). [In conclusion, DEM errors influence the determination of model physics and the final model outcomes.](#)  
Therefore, it is imperative to choose a suitable DEM source for regional glacier thickness modelling ([Koldtoft et al. 2021](#)).  
60 Farinotti et al. (2017 and 2021) intercompare the performance of most ITIMs and suggest that consideration of the uncertainty  
in the input data could improve the model output. However, to our knowledge, the uncertainty in different open access DEMs  
and [its-their](#) influence on various ITIM outputs over the TP has not been evaluated.

Currently, open-access DEMs covering the whole TP are mainly created by stereo mapping sensors such as ALOS AW3D30  
(Tadono et al., 2015), C- or X-band interferometry synthetic aperture radar (InSAR) such as TanDEM-X, and SRTM-C based

65 products such as NASADEM (Crippen et al. 2016). Shadows and the layover effect of InSAR technology (González and  
Fernández 2011), along with the deficient orientation of photogrammetrically stereo images (Mukherjee et al. 2013) or low  
stereo-correlation (Hugonnet et al. 2021) propagated during DEM production, may introduce errors and voids. Filling these  
voids with other data could result in increased uncertainty (Liu et al. 2019). Additionally, the rugged terrain of glaciers and the  
low contrast of snow cover can often lead to geometric distortion and missing data (Reuter et al. 2007; Takaku et al. 2020).  
70 Estimates of the accuracy of DEMs in different terrains and ~~physiognomylandforms~~, and for different vegetation coverage and  
land use have been conducted outside the TP using Global Navigation Satellite Systems (GNSS) measurements or high-  
resolution DEMs (González-Moradas and Viveen 2020; Grohmann 2018; Hawker et al. 2019; Uemaa et al. 2020). The  
performance of specific DEMs varied in these studies, indicating that the local terrain and land cover influenced the DEM  
accuracy. In the TP, glaciers are distributed across different climatic zones and have a wide range of elevations with rugged  
75 and complicated terrain (Fielding et al. 1994; Thompson et al. 2018). GNSS measurements are not accessible for most glaciers,  
and publicly ~~access-available high-resolution~~ DEM ~~with high resolution~~ is also ~~a~~of limitation due to its long temporal coverage  
(Shean 2017). The assessment of DEM accuracy in specific regions with limited GNSS measurements and high-resolution  
DEM is not enough to determine the performance of global DEMs across the whole glacierized TP.

Liu et al. (2019) evaluated the performance of seven public freely-accessed DEMs over the TP with sparse ICESat altimetry  
80 data and suggested that AW3D30 has a high degree of accuracy. However, ICESat data with a footprint of 70 m (larger than  
the resolution of their estimated DEMs) could result in intra-pixel errors in steep slopes (Uemaa et al. 2020). Besides, glacial  
regions were not considered in their studies, due to the variations of glaciers over time. Misregistration among DEMs, which  
may lead to evaluation bias (Han et al. 2021; Hugonnet et al. 2021; Van Niel et al. 2008), was also neglected. Bearing these  
issues in mind, and considering the limitations of optics sensors in rugged terrain and the glacier accumulation area (Chen et  
85 al. 2021), it is clear that a further assessment of the performance of AW3D30 is required. Recently, TanDEM-X (released in  
2017) and NASADEM (released in 2020) have been reported to have large improvements in accuracy relative to previous  
DEM products for various land-cover types (Wessel et al. 2018), floodplain sites (Hawker et al. 2019), slightly undulating  
terrain (Altunel 2019), and mountain environments (Gdulová et al. 2020). Nonetheless, their performance over the rugged and  
glacierized TP remains unclear.

90 The purpose of this study is to evaluate the optimal DEM to use for regional ice thickness estimation over the TP. We first  
evaluated the performance of six widely used DEMs: AW3D30, SRTM-GL1, NASADEM, TanDEM-X, SRTM v4.1, and  
MERIT which are derived from different sensors and have different resolutions, against ICESat-2 data which has been proven  
to have ~~a~~ high vertical accuracy and resolution (~~Brunt et al. 2019, 2021; Li et al. 2021~~), ~~but with sparse tracks (Fig. 1)~~. The  
elevation differences between these DEMs and the ICESat-2 are systematically analyzed ~~with regard to~~concerning aspect,  
95 slope, elevation, and glacier zones. The influence on the accuracy assessment of glacier elevation changes, terrain and  
misregistration among DEMs is then quantified. Finally, we compare the performance of ice thickness estimates derived using  
the six DEMs against in-situ measurements of ice thickness using Ground Penetrating Radar (GPR). ~~The influence of DEM  
uncertainties on the model outcomes is also analyzed.~~



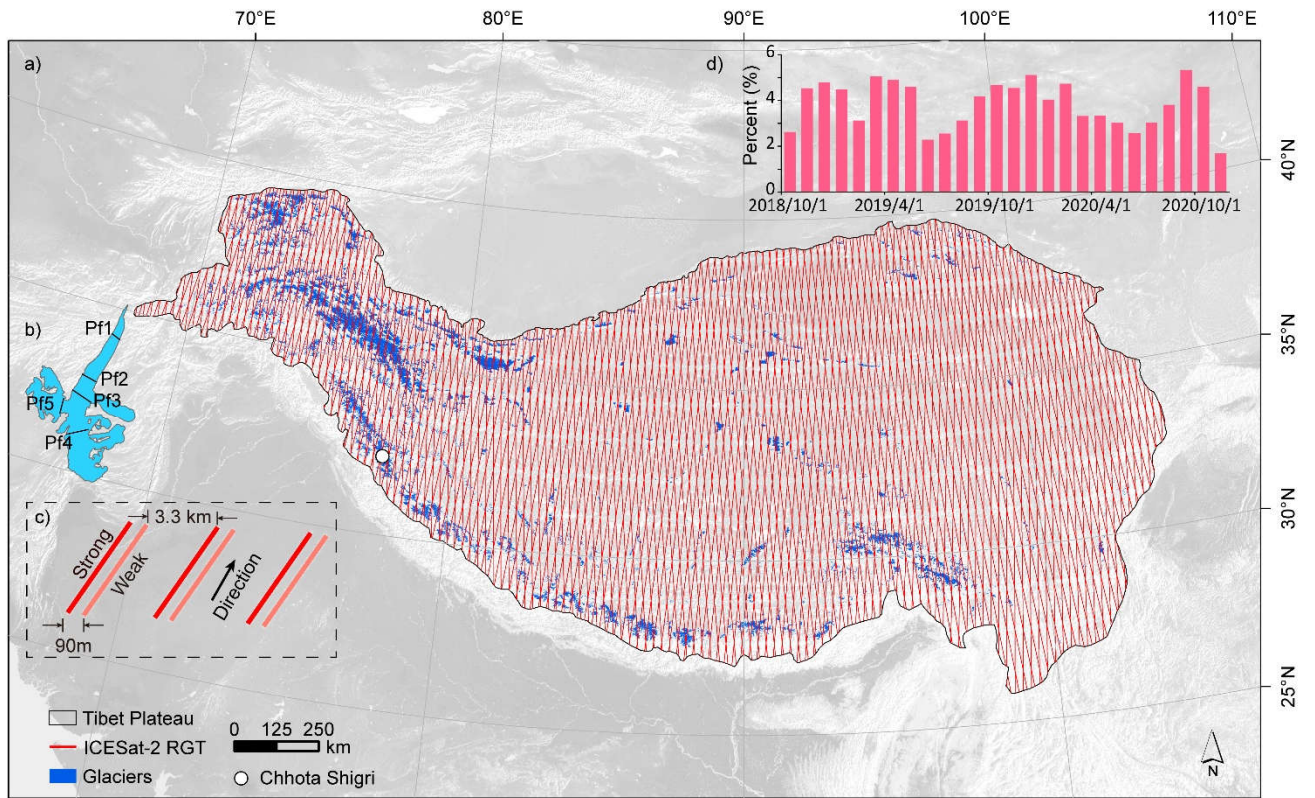

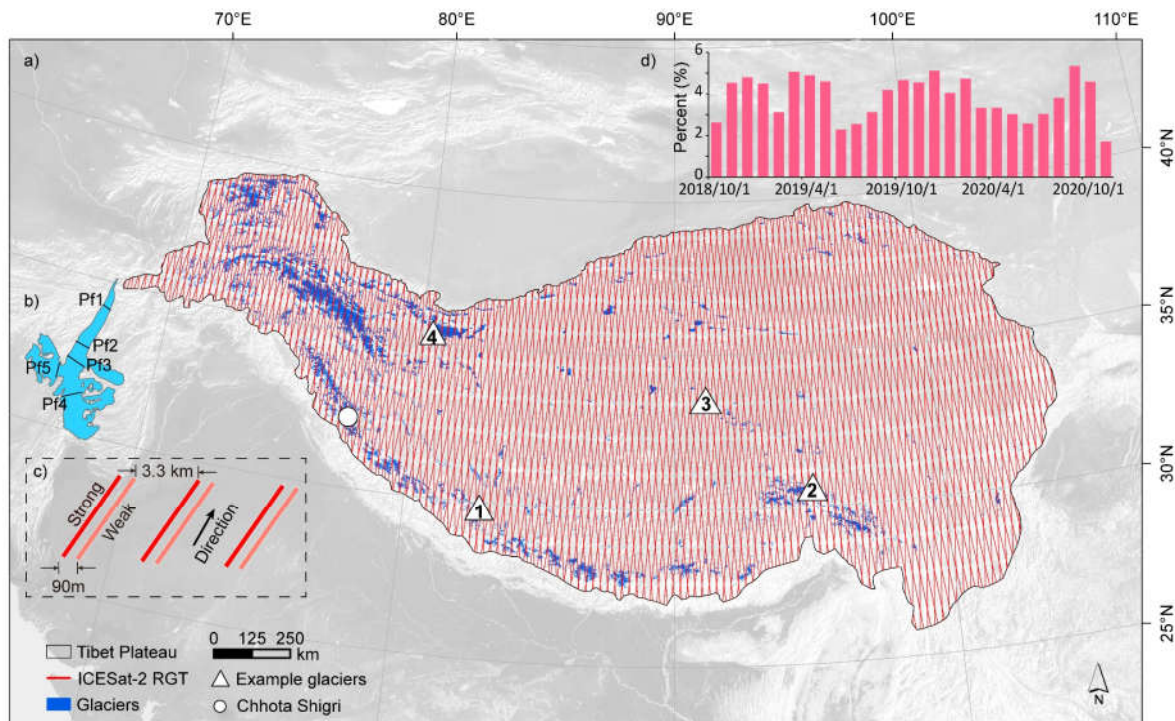

**Figure 1.** Location of the TP and its ICESat-2 reference ground tracks (RGTs). a) ICESat-2 tracks over the TP intersecting covering with glaciers. The numbered labels refer to glaciers used as examples in Fig.12. b) Location of Ground Penetrating Radar (GPR) profiles over the Chhota Shigri Glacier which is used as an example. c) Relative location of six beams when Advanced Topographic Laser Altimeter System (ATLAS) has backward orientation. The distance between RGTs is 28.8 km. d) Percentage of ICESat-2 data in different months from October 2018 to November 2020. The boundary of the TP is derived from SRTM above 2500 m a.s.l (Zhang et al. 2013).

## 2 Data and Methods

### 2.1 Descriptions of ICESat-2 elevation data referenced

ICESat-2, a follow-on mission to the Ice, Cloud, and land Elevation Satellite (ICESat), was launched on 15 September 2018, with the goal of acquiring Earth's geolocated surface elevation that referenced to the WGS84 ellipsoid at the photon level. ICESat-2 ATLAS (Advanced Topographic Laser Altimeter System) emits a pulse every 0.7 m along the track covering a horizontal circular area with 0.5 m in vertical extent and ~17 m diameter. This design diameter value varied due to the photo-counting lidar technology and potentially the atmospheric conditions (Magruder et al. 2020). ICESat-2 ATL03 and ATL06 product both can be used as elevation reference. ATL03 product has a spacing of ~0.7m and can provide more terrain details than ATL06 product. In this study, considering the resolution of global dem and compute cost, we used select the ICESat-2 Level-3A land-ice ATL06 product as an elevation reference. ATL06 heights are

median-based heights derived from a linear-fit model over each segment corrected for first-photon bias [and transmit-pulse shape](#). The segment has a length of 40 m centered on reference points at 20-m intervals along the track. The ATL06 product has better than 5 cm height accuracy and better than ~~+3-20~~ cm surface measurement precision in the [Antarctic \(Brunt et al. 2019,2020; Li et al. 2021\)](#) and [Qilian Shan \(Brunt et al. 2019; Zhang et al. 2020\)](#). The product also contains land background points. The RGI6.0 glacier inventory (RGI Consortium, 2017) was used to extract points falling on the glaciers (Fig. 2).

ICESat-2 ATL06 data covering the TP from October 2018 to November 2020 was downloaded from <https://earthdata.nasa.gov/> (Fig. 1). There are 2436 files containing about 100 GB of data in total. The fields: Location (latitude, longitude), surface elevation (h\_li), elevation uncertainty (h\_li\_sigma) and quality (atl06\_quality\_summary) were used. By combining the quality field (atl06\_quality\_summary=0) (Smith et al. 2019) with the glacier inventory, a total of 3.5 million points out of 0.16 billion records over the TP were selected (Fig. 1). The slope, aspect and elevation value of the cell center of the DEMs were extracted for the ICESat-2 footprints.



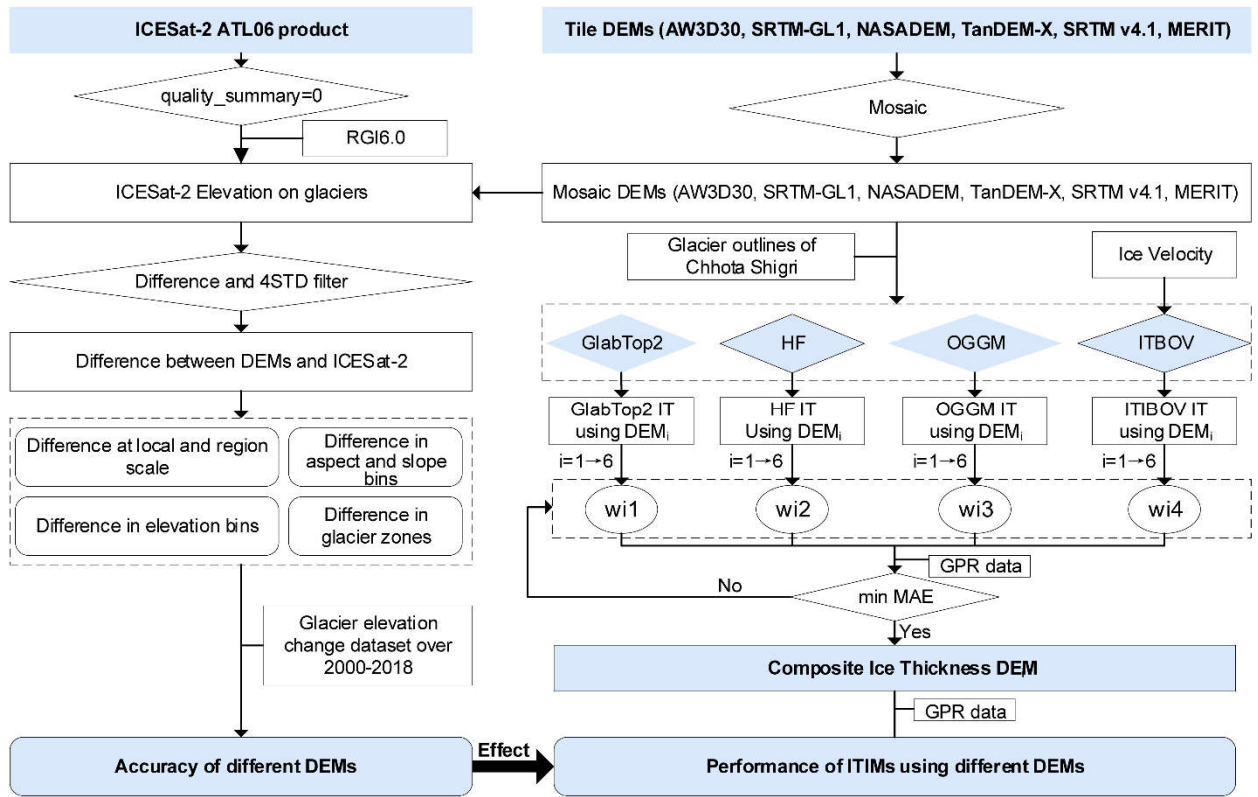

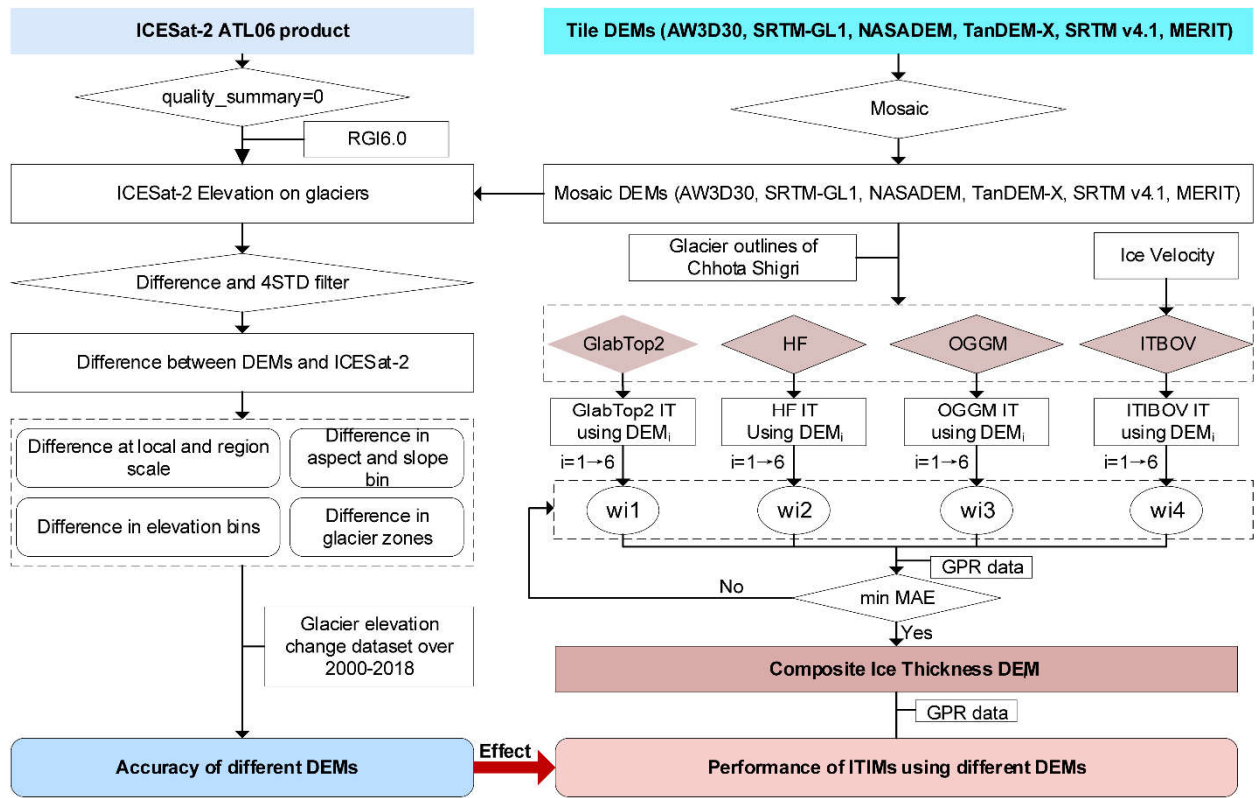

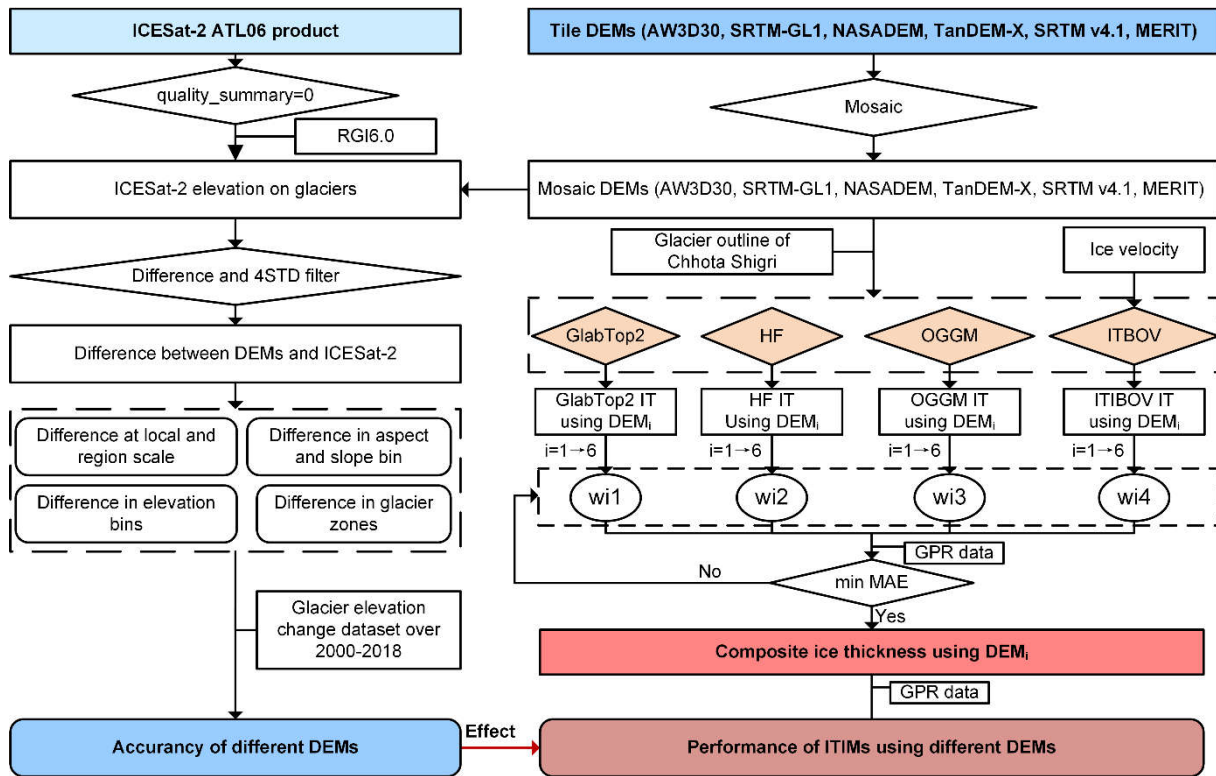

**Figure 2.** Flow chart showing the targets and methods used in this study including accuracy evaluation of DEMs and their effects on ice-thickness inversion models. The  $w_1$ ,  $w_2$ ,  $w_3$  and  $w_4$  denote the weight of each modeled ice thickness,  $i$  from 1 to 6 are six different DEMs, and the number 1–4 are the four ice thickness inversion models.

## 2.2 Descriptions of global-scale DEMs evaluated (AW3D30, TanDEM-X, NASADEM, SRTM)

Six global-scale DEMs were selected for evaluating their influences on ITIMs, based on popularity, data source, resolution and sensor type (optics or SAR) (Table 1).

1) ALOS World 3D - 30 m (AW3D30) is acquired by the optics stereo sensor loaded on the Advanced Land Observing Satellite (ALOS) which operated from 2006 to 2011 with a horizontal resolution of 30 m. [Approximate 10 % of global land area, mainly in tropical rainforest areas and the polar areas, has voids mostly due to cloud or snow/ice covers constation in source imageries.](#) Data gaps are filled with SRTM, ASTER GDEM v3, ArcticDEM v3, and TanDEM-X 90 (Takaku et al. 2020). [After filling gaps, the accuracies in void-filled and void-free areas are nearly consistent \(Takaku et al. 2020\).](#) Data was ~~acquired available at~~ from <https://www.eorc.jaxa.jp/ALOS/en/aw3d30/index.htm> after user registration.

2) TanDEM-X 90 m DEM (hereafter TanDEM-X) is a product derived from the first bistatic X band SAR mission of the world which took place from 2014 to 2016 (Bachmann et al. 2021). It is a pixel-reduced product of the global TanDEM-X DEM with a pixel spacing of 0.4 arcseconds (12 m). [The official reported absolute vertical and horizontal accuracy is better](#)

150 than 10 m at the 90% confidence level. It is noted that the current release is a non-edited version: areas with outliers, noise and voids remain. The original data was collected during different seasons and years, and the influence of ablation and accumulation of glaciers should also be noted. Data was acquired from <https://download.geoservice.dlr.de/TDM90/>.

3) NASADEM is a new product released in 2020, which is derived by reprocessing the original SRTM signal data using updated interferometric unwrapping algorithms and auxiliary data, such as ICESat, to reduce voids and improve vertical accuracy (Crippen et al. 2016). Remnant voids are filled mainly by Global Digital Elevation Model (GDEM) v3 data. 155 This data was downloaded from <https://search.earthdata.nasa.gov/>.

4) ~~Other SRTM based DEMs (SRTM-GL1, SRTM v4.1, MERIT)~~-SRTM-GL1 (30 m) is an extensively used DEM in ITIMs. The first open-access ice-thickness database of global glaciers also adopted SRTM-GL1 as its DEM source (Farinotti et al. 2019). Voids were primarily filled by ASTER GDEM2. SRTM v4.1 and MERIT were selected to compare with 160 TanDEM-X, and simultaneously estimate the influence of DEM resolution on ITIMs.

5) SRTM v4.1, with a spatial resolution of 90 m, is produced by the method proposed by Reuter et al. (2007), including merging tiles, filling small holes iteratively and interpolating across the holes using a range of methods, according to the size of [the](#) hole, and the land type surrounding it (<https://cgiarcsi.community/data/srtm-90m-digital-elevation-database-v4-1/>). SRTM v4.1 was also used to compare against the performance of SRTM-GL1 to estimate the influence of 165 resolution.

6) MERIT is also widely used with a spatial resolution of 90 m. It was developed by removing absolute bias, stripe noise, speckle noise, and tree height bias from the existing spaceborne DEMs (SRTM3 v2.1 and AW3D30 v1) using multiple satellite datasets and filtering techniques (Yamazaki et al. 2017). Its accuracy was significantly improved, especially in flat regions (Yamazaki et al. 2017). The overall accuracy is similar to TanDEM-X in floodplain sites (Hawker et al. 2019), 170 but lower in short vegetation. The dataset was downloaded from [http://hydro.iis.u-tokyo.ac.jp/~yamadai/MERIT\\_DEM/](http://hydro.iis.u-tokyo.ac.jp/~yamadai/MERIT_DEM/).

~~Elevation of ICESat-2 data, NASADEM\_SHHPv001 and TanDEM-X are is based on WGS84 ellipsoid reference, and elevation of the other four DEMs is are all based on EGM96 geoid (Table 1). The geoidheight function of geoidheight provided by MATLAB was used to calculate geoid height to unify their references.~~

175 **Table 1** Details of the selected DEMs.

176

| Item      | Version                                       | Acquisition time | <a href="#">Reference</a>                          | Release time | Resolution (m) | Sensor type | Description                                                                                                                                                         | Source                                                                                                                                                                         |
|-----------|-----------------------------------------------|------------------|----------------------------------------------------|--------------|----------------|-------------|---------------------------------------------------------------------------------------------------------------------------------------------------------------------|--------------------------------------------------------------------------------------------------------------------------------------------------------------------------------|
| AW3D30    | v2.2                                          | 2006–2011        | <a href="#">EGM96</a><br><a href="#">geoid</a>     | Apr. 2019    | 30             | Optical     | Generated from its original version processed at 5 m or 2.5 m grid spacing. Voids were filled with other open-access DSMs such as SRTM, ASTER GDEM, ArcticDEM, etc. | <a href="https://www.eorc.jaxa.jp/ALOS/en/aw3d30/index.htm">Accessed 2021-10-19 from https://www.eorc.jaxa.jp/ALOS/en/aw3d30/index.htm</a>                                     |
| SRTM-GL1  | v003                                          | Feb. 2000        | <a href="#">EGM96</a><br><a href="#">geoid</a>     | Sep. 2015    | 30             | SAR C-band  | ASTER GDEM2, USGS GMTED2010 or USGS National Elevation Dataset were used for voids filling                                                                          | <a href="https://earthexplorer.usgs.gov/">Accessed 2021-10-19 from https://earthexplorer.usgs.gov/</a>                                                                         |
| NASADEM   | <a href="#">SHHPv001</a><br><a href="#">‡</a> | Feb. 2000        | <a href="#">WGS84</a><br><a href="#">ellipsoid</a> | Feb. 2020    | 30             | SAR C-band  | Reprocessing of the original SRTM radar signal data and telemetry data with updated algorithms and auxiliary data such as ASTER GDEM2, ICESat, AW3D30               | <a href="https://search.earthdata.nasa.gov/">Accessed 2021-10-19 from https://search.earthdata.nasa.gov/</a>                                                                   |
| TanDEM-X  | v1.0<br>(Non-edited version)                  | 2010–2015        | <a href="#">WGS84</a><br><a href="#">ellipsoid</a> | Feb. 2019    | 90             | SAR X-band  | A product variant of the 12 m (0.4 arcsec) DEM product in version 1.0 from the world's first bistatic SAR mission                                                   | <a href="https://download.geoservice.dlr.de/TDM90/">Accessed 2021-10-19 from https://download.geoservice.dlr.de/TDM90/</a>                                                     |
| SRTM v4.1 | v4.1                                          | Feb. 2000        | <a href="#">EGM96</a><br><a href="#">geoid</a>     | Nov. 2018    | 90             | SAR C-band  | Reproduced using the method of Reuter et al. (2007).                                                                                                                | <a href="https://drive.google.com/drive/folders/0B_J08t5spvd8RWRmYmtFa2puZEE">Accessed 2021-10-19 from https://drive.google.com/drive/folders/0B_J08t5spvd8RWRmYmtFa2puZEE</a> |
| MERIT     | v1                                            | Feb. 2000        | <a href="#">EGM96</a><br><a href="#">geoid</a>     | Oct. 2018    | 90             | SAR C-band  | Improved by removing multiple error components from the existing spaceborne DEMs (SRTM3 v2.1 and AW3D-30m v1).                                                      | <a href="http://hydro.iis.u-tokyo.ac.jp/~yamadai/MERIT_DEM/">Accessed 2021-10-19 from http://hydro.iis.u-tokyo.ac.jp/~yamadai/MERIT_DEM/</a>                                   |

177

### 2.3 ~~Ice thickness inversion method~~ Ice thickness inversion models

Tiles of six DEMs (AW3D30, TanDEM-X, NASADEM, SRTM-GL1, SRTM v4.1, and MERIT) were used to form a mosaic of terrain data covering the whole TP. Four ice-thickness inversion models (GlabTop2, HF, OGM, ITBOV) were used to estimate the glacier thickness. The Chhota Shigri Glacier located in western Himalaya ~~for which the~~ with available GPR data ~~were available~~ (Fig.1) was selected as an example to evaluate the influence of DEM uncertainty on the ITIMs. Full details of the ITIMs are given below:

GlabTop (Glacier bed topography) is based on the theory that glacier thickness is mainly determined by the slope of the terrain (Linsbauer et al. 2009, 2012; ~~Linsbauer et al. 2009~~; Paul and Linsbauer 2012). It is assumed that the glacier is an ideal plastic fluid, with bottom slip being ignored. Based on the empirical relationship between mean shear stress along the centerlines ~~centrelines~~ and the range of glacier elevation (Haeberli and Hoelzle 1995) (Eq. 1), the actual basal shear stress  $\tau$  can be determined.

$$\begin{aligned}\tau &= 0.005 + 1.598\Delta H - 0.435\Delta H^2 \\ \tau &= 150kPa, \text{ if } \Delta H > 1600\end{aligned}\quad (1)$$

where  $\Delta H$  is the elevation range of the glacier. The ice thickness  $h$  can then be determined from Eq. (2)

$$h = \frac{\tau}{f \rho g \sin \alpha} \quad (2)$$

where  $f$  is the shape factor,  $\rho$  is glacier density ( $850 \pm 60 \text{ kg/m}^3$ ) (Huss 2013),  $g$  is the acceleration due to gravity ( $9.8 \text{ m/s}^2$ ) and  $\alpha$  is the slope. Glabtop2 is an automated method for calculating ice thickness, similar to GlabTop, but avoiding ~~avoids~~ digitizing the branch lines. For details refer to Frey et al. (2014).

HF (Huss- ~~Farinotti~~ ~~Fainotti~~) model is based on the mass balance principle which relates the surface mass balance of the glacier ( $b$ ) to the ice flux and variation in the glacier thickness. Given the ice flux, ice thickness can be calculated according to Glen's ice flow law (Farinotti et al. 2009a; Huss and Farinotti 2012).

$$h = \sqrt[n+2]{\frac{q(1-fsl)}{2A} \frac{n+2}{(f \rho g \sin \alpha)^n}} \quad (3)$$

where  $h$  is the mean elevation of band thickness,  $q$  is the ice flux,  $fsl=0.8$  is the basal slip correction factor,  $n=3$  is the exponent of flow law,  $\rho$  is glacier density ( $850 \pm 60 \text{ kg/m}^3$ ) (Huss 2013),  $g$  is the acceleration due to gravity ( $9.8 \text{ m/s}^2$ ),  $f=0.8$  is the valley shape factor (0.8) (Cuffey and Paterson 2010) and  $A$  is the Glen flow rate factor ( $3.24 \times 10^{24} \text{ Pa}^{-3} \text{ s}^{-1}$ ) (Cuffey and Paterson 2010; Gantayat et al. 2014).

This method defines a new variable  $\tilde{b} = \dot{b} - \rho g \frac{\partial h}{\partial t}$ , where  $\tilde{b}$  is the apparent mass balance,  $\dot{b}$  is the glacier surface mass balance, and  $\frac{\partial h}{\partial t}$  is the glacier surface elevation change.  $\tilde{b}$  is linearly related to the elevation ~~and has nothing to do with whether or not~~

~~the glacier is in a stable state.~~ In the absence of mass balance data and thickness change data on the surface of a glacier, the ice flux  $q$  can be obtained by estimating  $\tilde{b}$ , which is determined from ~~experience~~ (Huss and Farinotti ~~et al.~~ (2012)). Ice thickness in each elevation band can then be determined by substituting into Equation (3). Finally,  $h$  is extrapolated, in combination with the slope, to obtain the distributed ice thickness, according to the parameters in Huss and Farinotti (2012).

The Open Global Glacier Model (OGGM) is based on the same concept as HF, but has two main differences (Maussion et al. 2019). Firstly, the method described in Kienholz et al. (2014) is used to automatically obtain the middle streamlines and watershed division. Secondly, the apparent mass balance data are reconstructed from the local climatic dataset from variables such as precipitation and temperature.

The Ice Thickness Inversion Based On Velocity (ITIBOV) model is inverted from the shallow ice approximation, it obtains the ice thickness by combining the surface velocity field with the Glen ice flow law (Gantayat et al. 2014; Glen 1955; ~~McNabb et al. 2012~~):

$$h = \frac{n+1}{2A} \frac{(1-k)u_s}{(f\rho g \sin \alpha)^n} \quad (4)$$

where  $h$  is ice thickness,  $u_s$  is glacier surface velocity, and  $k$  is the contribution ratio of basal slip velocity relative to the  $u_s$ . We used the mean velocity over 1985-2019 from ITS LIVE dataset (Gardner 2019) as the  $u_s$  input. We assumed that basal slip only occurred during the warm seasons, and  $k$  was calculated by dividing the annual glacier velocity by winter glacier velocity (Wu et al. 2020). Data from the Global Land Ice Velocity Extraction from Landsat 8 (GoLIVE) dataset with a date separation length of less fewer than 96 days are used to estimate the monthly velocity (Fahnestock et al. 2016; Scambos 2016), allowing the winter velocity (December, January and February) and annual mean velocity to be calculated. Basal factor  $k$  was calculated as 0.80 (Fig. S1). ~~Some-The~~ shared parameters, such as creep factor, shape factor and basal creep factor are the same in all four models.

~~It is possible that a~~ An ensemble of the output from different models can improve the ~~modeled modelled~~ thickness (Farinotti et al. 2017; Farinotti et al. 2021). Therefore, after calculating the ice thickness from four models using different DEMs, we calculated an ensemble ice thickness using the same DEM but with different models. ~~The weighting given to each model is iteratively calculated to achieve a minimal mean absolute error (Fig. 2). First, the ensemble ice thickness was the sum of the four models with four weights w1, w2, w3, and w4, respectively. The sum of four weights equals to 1. 70% of the GPR result data are adopted as calibration data. 30% of the GPR result are adopted as validation data. Then, the four weights were iteratively changed to achieve the minimal mean absolute error between calibration data and model result. Finally, the MAE between ensemble ice thickness and validation data are calculated.~~

#### 2.4 Accuracy assessment method

The error in the DEMs is considered to be the difference between the DEM elevation and the ICESat-2 measurement. To remove the influence of outliers, elevation differences outside four standard deviations were removed. Mean error (ME), mean

absolute error (MAE), median error, root mean square error (RMSE), standard deviation (STD), and normalized median absolute deviation (NMAD) were calculated for the error assessments. NMAD and ME were used to assess the disturbance from extreme errors (Höhle and Höhle 2009; Gdulová et al. 2020). When calculating the ME, the positive and negative biases cancel each other, making the error smaller; therefore, the STD together with ME could be a complementary indicator for assessment.

$$ME = \frac{1}{n} \sum_1^n (H_{DEM} - H_{ICESat-2}) \quad (5)$$

$$MAE = \frac{1}{n} \sum_1^n abs(H_{ICESat-2} - H_{DEM}) \quad (6)$$

$$RMSE = \sqrt{\frac{1}{n} \sum_1^n (H_{ICESat-2} - H_{DEM})^2} \quad (7)$$

$$STD = \sqrt{\frac{1}{n-1} \sum_1^n (H_{ICESat-2} - H_{DEM} - ME)^2} \quad (8)$$

$$NMAD = 1.4826 * median(abs(H_{ICESat-2} - H_{DEM})) \quad (9)$$

Glacier surface elevation changed at -21 – 17m/yr over the TP during 2000-2018 (Shean et al. 2020). Therefore, the disparity of acquiring date between ICESat-2 and six DEM (Table 1) could introduce large error due to the glacier dynamic. TanDEM-X and AW3D30 are acquired in different months and years (Table 1), it's hard to analyse the impact of glacier dynamic on accuracy assessment. However, the other four DEMs are produced from NASA's Shuttle Radar Topography Mission during the 11-day mission in February 2000. We selected ICESat-2 data acquired in February 2019 and 2020. Then the glacier elevation dynamic magnitude during February 2000 and February 2019/2020 are subtracted from the selected ICESat-2 elevation based on. †The mean glacier elevation change data is adopted from Shean et al. (2020). By comparing the elevation from the four DEMs and adjusted ICESat-2, we could exactly know the impacts of glacier dynamic on accuracy assessment from glacier dynamic.

### 3. Results

#### 3.1 Accuracy of DEMs

Figure 3 shows a comparison of elevation from the six DEMs with the ICESat 2 data. The four standard deviations (that is 4 std) filter was chosen to not only filter on the differences between ICESat-2 and DEMs used to filter out exclude extreme outliers, but also keep most records in the further accuracy analysis. The Ration of excluded outliers relative to the record of each DEM is excluded less than 1% of the data. Overall, there is non-irregular deviation existed among these DEMs and ICESat-2 elevation after filtering (Fig. 3). The ICESat-2 vs DEMs values are distributed tightly around the fit line with a slope coefficient close to of 1, with no obvious differences among the R<sup>2</sup>. NASADEM and TanDEM-X performed the best in terms



255 of intercept and fit RMSE, with very little difference to the ICESat-2 data. ~~For the other four DEMs, there are obvious systematic shifts which can be inferred from the high  $R^2$  values, but high intercept values.~~

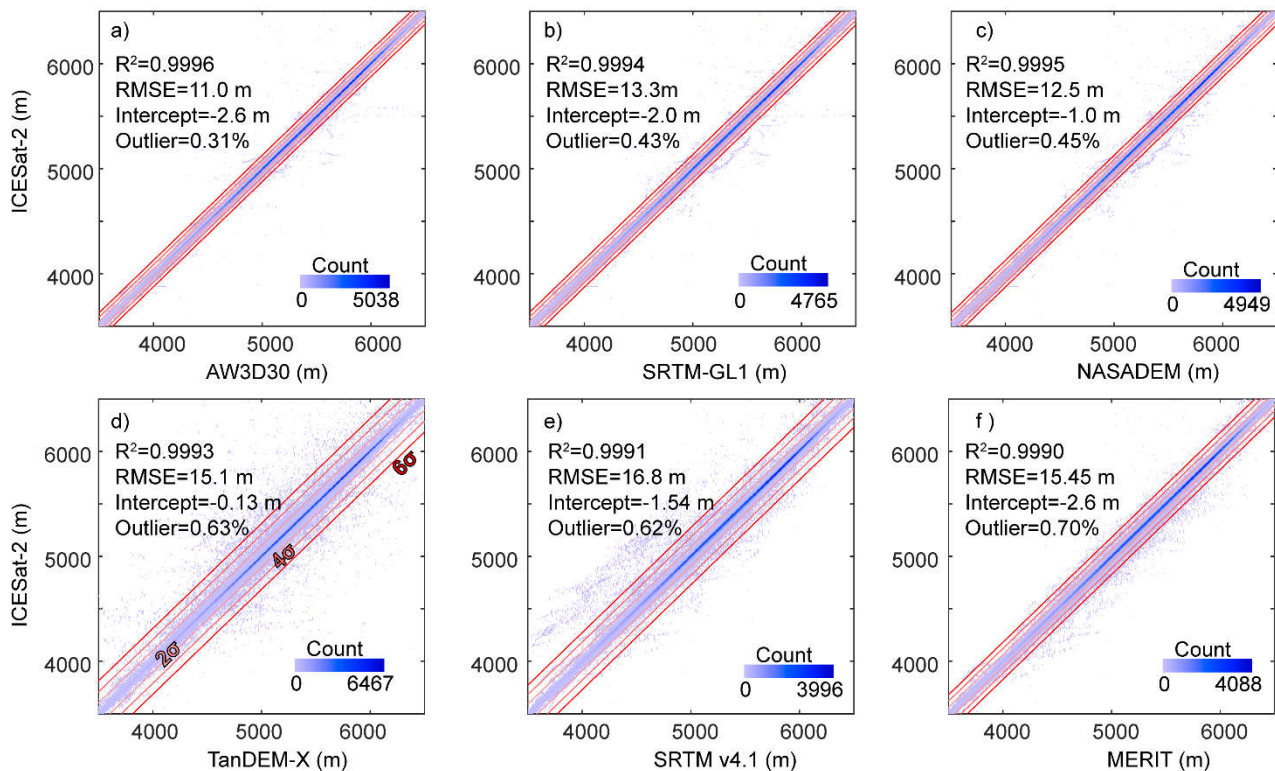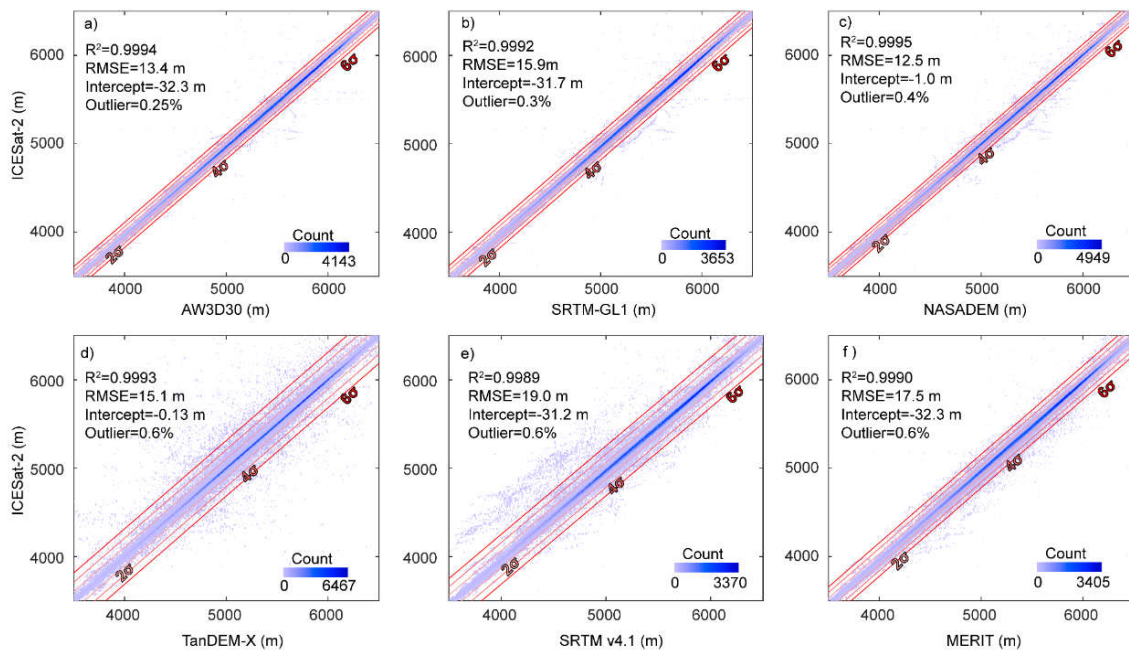

**Figure 3.** Differences between six DEMs and ICESat-2 elevation. a) AW3D30, b) SRTM-GL1, c) NASADEM, d) TanDEM-X, e) SRTM v4.1, and f) MERIT. The gradually lighter red lines denote the range within 2, 4 and 6 std of the mean. The text at the top left of each panel gives the fit results for data within 4 std of the mean. ‘Outlier’ denotes the proportion of outliers relative to the total records. ‘R<sup>2</sup>’, ‘RMSE’, and ‘Intercept’ are fit results when the slope coefficient is set to 1. [The E](#)levation range was cut to 3500–6500 m, the range in which most elevations values are located, to show clearly the effect of using different multiples of the std from the mean.

~~The difference statistics for the six DEMs are presented in Figure 4.~~ Statistically, Median and ME differed little, ~~which indicated that~~ ~~and~~ extreme values did not influence the ME much after the 4 std filter was applied ([Fig. 4](#)). STD was slightly larger than NMAD, especially for TanDEM-X, indicating larger discrepancies ~~due to the DEM errors and noise~~ (Höhle and Höhle 2009). NASADEM performed ~~far~~ better than the other two 30-m resolution DEMs ~~in~~ ~~,~~ ~~with smaller RMSE (12.6 m), MAE (9.4 m), and ME (-1.0 m).~~ AW3D30 ~~behaved best in RMSE (11.3 m), MAE (8.2 m).~~ ~~has a lower absolute accuracy (RMSE: 34.9 m, ME: -32.3 m), but a similar relative accuracy to NASADEM because of the similar overall dispersion (-13 m) and spatial scale.~~ SRTM-GL1 and NASADEM are both produced from [the](#) same original SAR data, but ~~have large differences~~ ~~differed~~ in RMSE (~~3513.5~~ vs 12.6 m), MAE (~~31.910.0~~ vs 9.4 m), and ME (~~-31.72.0~~ vs ~~-1.00.9~~ m). The new algorithm and auxiliary data applied in NASADEM do indeed ~~greatly~~ improve the absolute accuracy of the product over glacierized terrain. The quality of TanDEM-X was the best out of the 90-m resolution DEMs with [the smallest](#) RMSE (15.1 m), MAE (8.9 m), ME (~~-~~0.1 m), and STD (15.1 m). SRTM v4.1 and MERIT are both error-reduced products from SRTM3 v2 (Reuter et al. 2007; Yamazaki et al. 2017), and they have similar ~~behavior, with~~ ME (~~about -32.1.5 m vs 2.6 m~~) and RMSE (~~-3717.0 m vs 15.6 m~~).

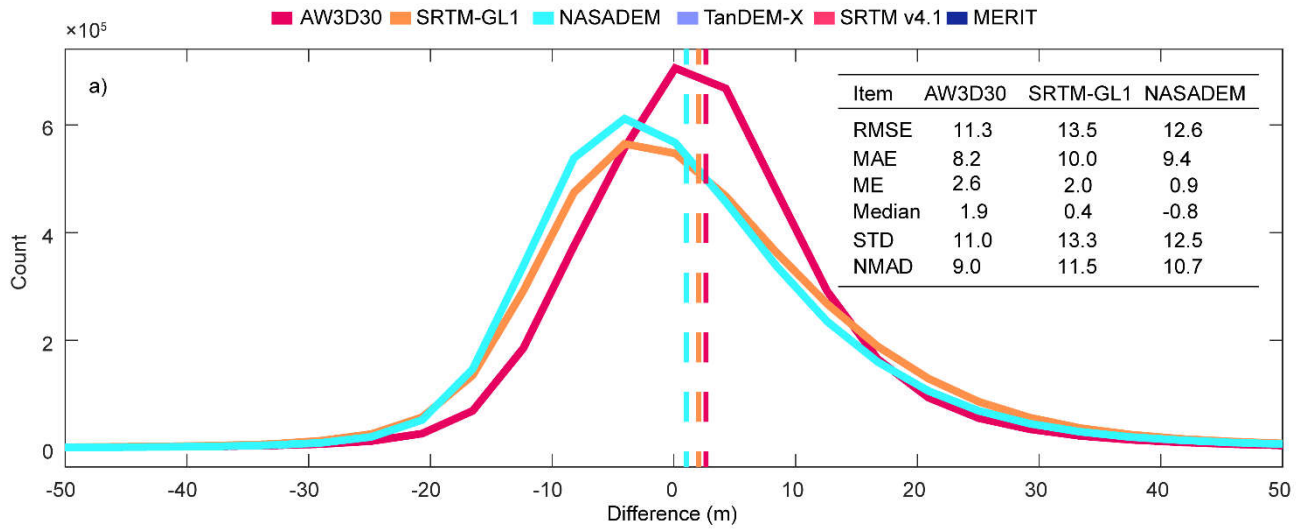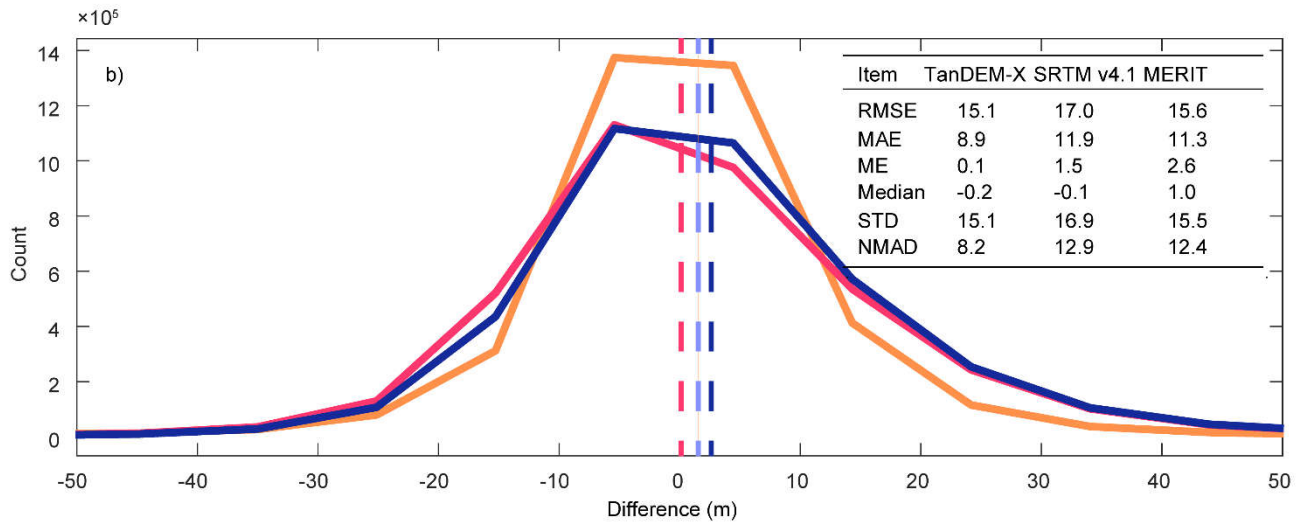

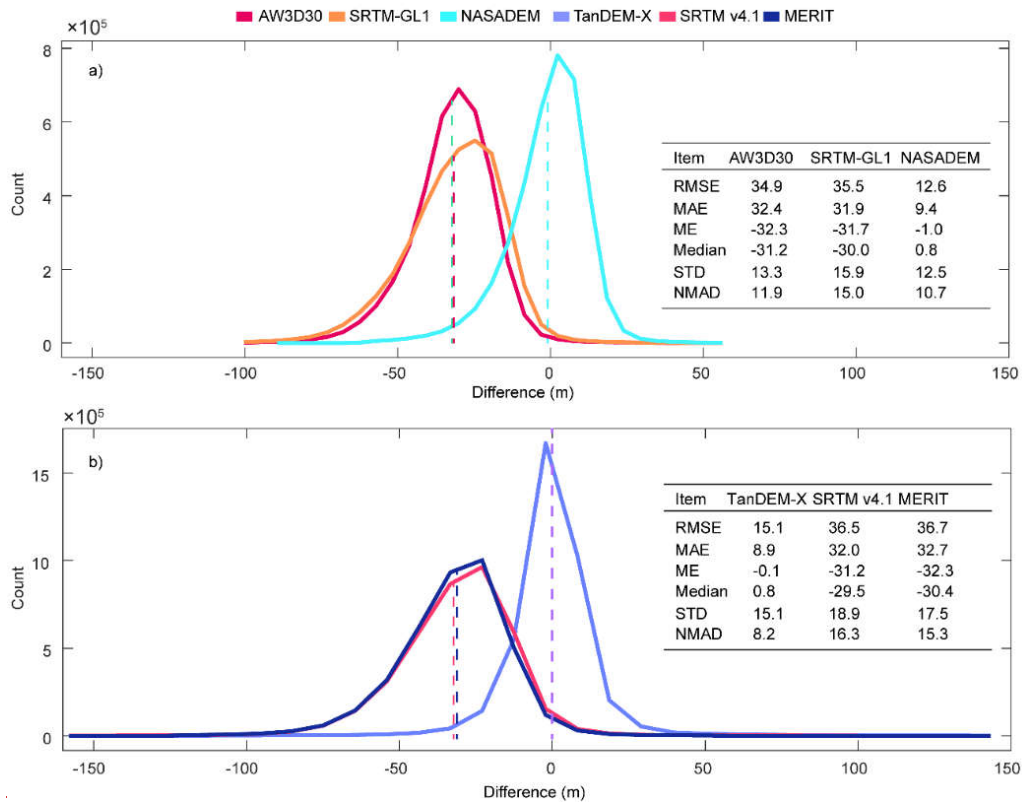

**Figure 4.** Overall difference (m) statistics between six DMEs and ICESat-2 elevation. a) 30-m-resolution DEMs, AW3D30, SRTM-GL1 and NASADEM. b) 90-m-resolution DEMs, TanDEM-X, SRTM v4.1 and MERIT. The vertical dash line denotes the mean elevation difference of each DEM between ICESat-2.

The spatial distribution of the ME and STD are shown in Figure 5. AW3D30, SRTMGL-1, SRTM v4.1 and MERIT all have large negative ME over the TP, while the ME of NASADEM and TanDEM X are mostly within the range—  
10 to 10 m. For these two DEMs, the ME in in southeast Tibet the Himalaya is more negative-positive than that in in southeast  
Tibetthe Himalayas, and it is slightly positive-negative in western Kunlun and the Karakoram mountains (Fig. 5a). It is worth  
 noting that in the Himalayas and southeast Tibet, the ME of NASADEM thesethe other four DEMs is more negative-positive  
 than that of TanDEM-X and AW3D30. ME of TanDEM-X are mainly at  $\pm 5$  m, but with some large values in several regions.  
SRTMGL-1, NASADEM, SRTM v4.1 and MERIT have the nearly same distribution of ME, and all show negative ME values  
in the West Kunlun and Karakoram. ME of NASADEM is smaller than SRTM-GL1 in most regions of TP, but is bigger in  
West Kunlun and Karakoram. Overall, the STD of 30-m resolution DEMs is much better than that of 90-m resolution DEMs  
(Fig.5b). STD along the Hindu Kush-Himalaya and southeast Tibet was larger than that in other regions. Thereinto, STD in  
 southeast Tibet was relatively larger ( $>12$  m). Specifically, the STD of AW3D30 and NASADEM and NASADEM was  
 minimum and share similar spatial distribution features. spatially-relevant. Relative to ME, the STD of NASADEM was

295 improved over the most part of TP, compared with that of SRTM-GL1. This indicates that some disturbances from noise  
and errors may exist in the SRTM-GL1, SRTM v4.1 and MERIT in the West Kunlun and Karakoram. TanDEM-X performs  
well in overall statistics (Fig. 4b) and ME (Fig. 5a), but it is not stable didn't show much large advantage and was even worse  
in STD in some areas. Spatially, it performed worse than SRTM-GL1 in terms of STD (Fig. 5b). The STD and ME of SRTM  
v4.1 and MERIT are almost the same in space (Fig. 5b), corresponding to their similar overall STD (both ~18-15 m) and ME (both  
300 ~32 m) values (Fig. 4b).

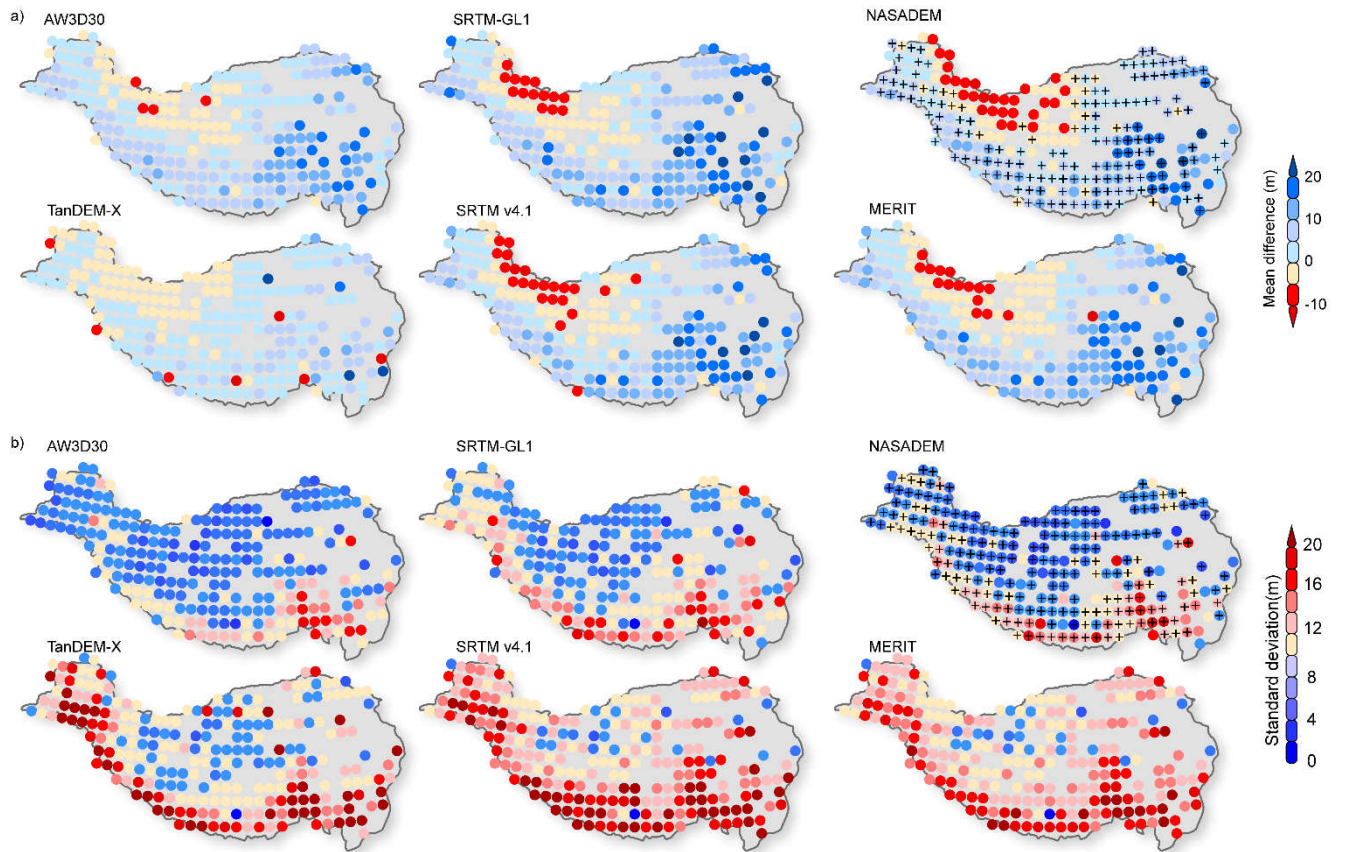

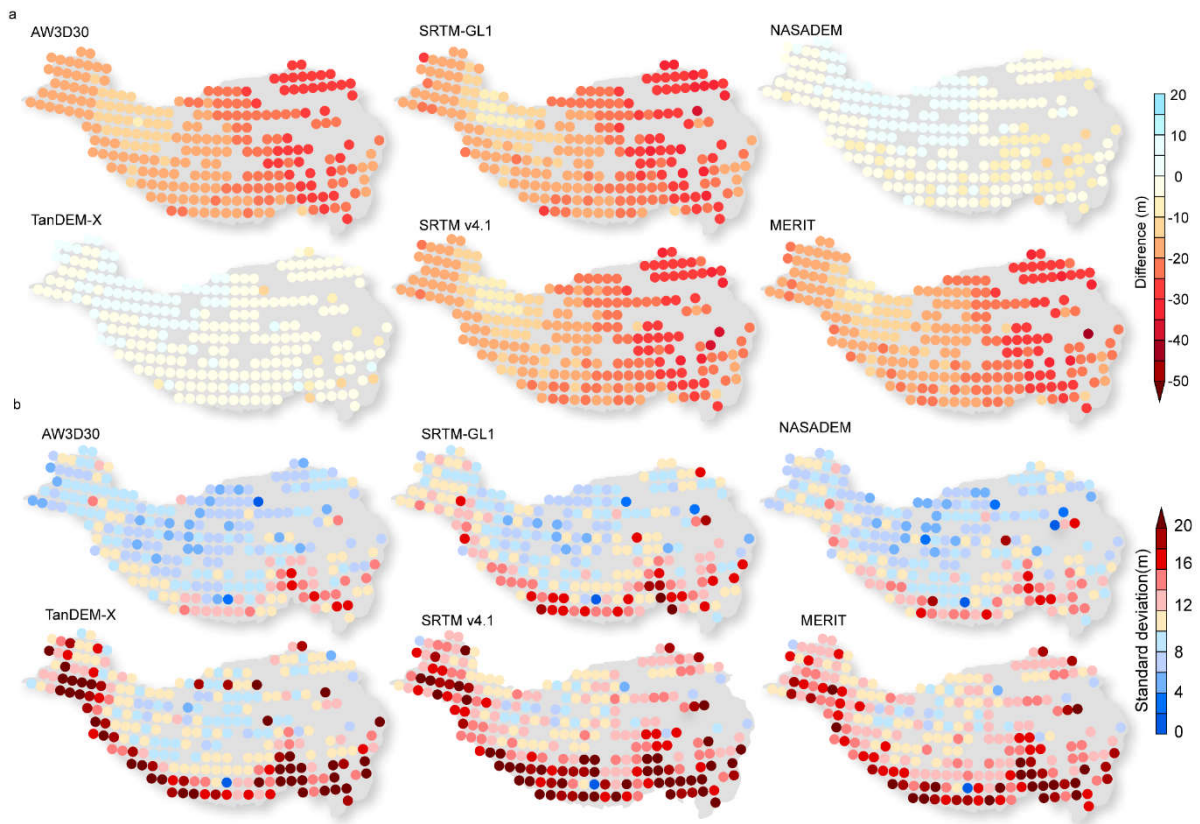

305

**Figure 5.** Aggregated spatial mean error (ME) (a) and standard deviation (STD) (b) between six DEMs and ICESat-2 elevation for  $1^{\circ} \times 1^{\circ}$  cells across the TP. The cross symbol denotes that NASADEM performs better than SRTM-GL1 in ME or STD

### 3.2 Differences between DEMs and ICESat-2 in aspect, slope and elevation

310 The influence of terrain factors on the differences between the DEM and ICESat-2 elevations for the six DEMs are presented in Figure 6. The influence of aspect is most apparent for SRTM-GL1, with a median value of about  $-25.5$  m in the south aspect which increased in magnitude gradually towards to the north aspect ( $\sim -35$  m). A similar pattern, but with a smaller amplitude ( $\pm 5$  m) is apparent for the NASADEM and TanDEM-X, MERIT ( $\pm 1$  m) and AW3D30 ( $0 - 2$  m) (Fig.6a).

315 For NASADEM and TanDEM-X, the differences plotted against slope are distributed around zero, with mean median values of about  $-1.6$  and  $-1.0$  m, respectively (Fig.6b). For the other DEMs, the differences with slope are mainly less than zero, with a median range of  $-30$  to  $-48$  m and a mean upper quartile of  $-20$  m. The median differences of the 30-m DEMs generally increased along the slope. However, for the 90-m DEMs, the difference increased with slope at first, but then decreased on steep slopes. NASADEM and TanDEM-X had minimum mean median values of about  $0.9$  and  $1.2$  m, respectively (Fig.6b).



For all DEMs, the spreads of differences become larger as the slope becomes steeper. This increase is most obvious for  
320 TanDEM-X and SRTM v4.1, with rates of ~~0.74~~1.29 m/degree ( $r=0.9697$ ,  $p<0.01$ ) and ~~01.60~~11 m/degree ( $r=0.8389$ ,  $p<0.01$ ).  
~~This indicated that errors of both DEMs suffered from serious slope effects. AW3D30 and NASADEM have a similar mean~~  
~~spread (19.2m vs 20.8m).~~ On slopes of less than 20°, TanDEM-X has the best quality with a mean median value of ~~-0.2~~-0.39  
~~m and mean spread of 11.7 m, and 5.8±2.2 m, but increased disparity on steeper slopes respectively.~~ MERIT shows a slight  
advantage over SRTM v4.1 with a reduced spread for steep slopes. —Overall, relative to the other DEMs, AW3D30 and  
325 NASADEM behaves best against the slope in terms of spread and median value. ~~MERIT shows a slight advantage over SRTM~~  
~~v4.1 with a reduced spread for steep slopes.~~

The differences for all DEMs generally ~~increased-decreased~~ with elevation, with fluctuations around zero at very high  
elevations (Fig.6c). AW3D30 has a smaller difference at low elevation relative to NASADEM and SRTM-GL1. For  
NASADEM and ~~TanDEM-X~~SRTM-GL1, the differences ~~are negative at lower elevations and slightly positive at higher along~~  
330 ~~the elevations show the similar distribution; NASADEM and~~ varied ~~from -70 to 20 m over the full elevation range, and from~~  
~~-10 to 10 m over the range 4500–6500 m, where measurements are concentrated (Fig. 6d); However, NASADEM behave best~~  
~~out of six DEMs in the high elevation.~~ TanDEM-X varied ~~from -15 to 20 m over the full elevation range, and from around -~~  
~~5 to 5 m between 4500 and 6500 m. For the other four DEMs, the differences all remained below zero for the full range of~~  
~~elevations.~~ The ~~SRTM-GL1~~, SRTM v4.1 and MERIT differences changed ~~similarly-almost similarly same~~ from ~~-100-20~~ to 40  
335 ~~m.~~ ~~In comparison, the differences for AW3D30 were smaller for lower elevation bins, ranging from -70 to 0 m., but show~~  
~~differences at the high elevation reigenregion.~~

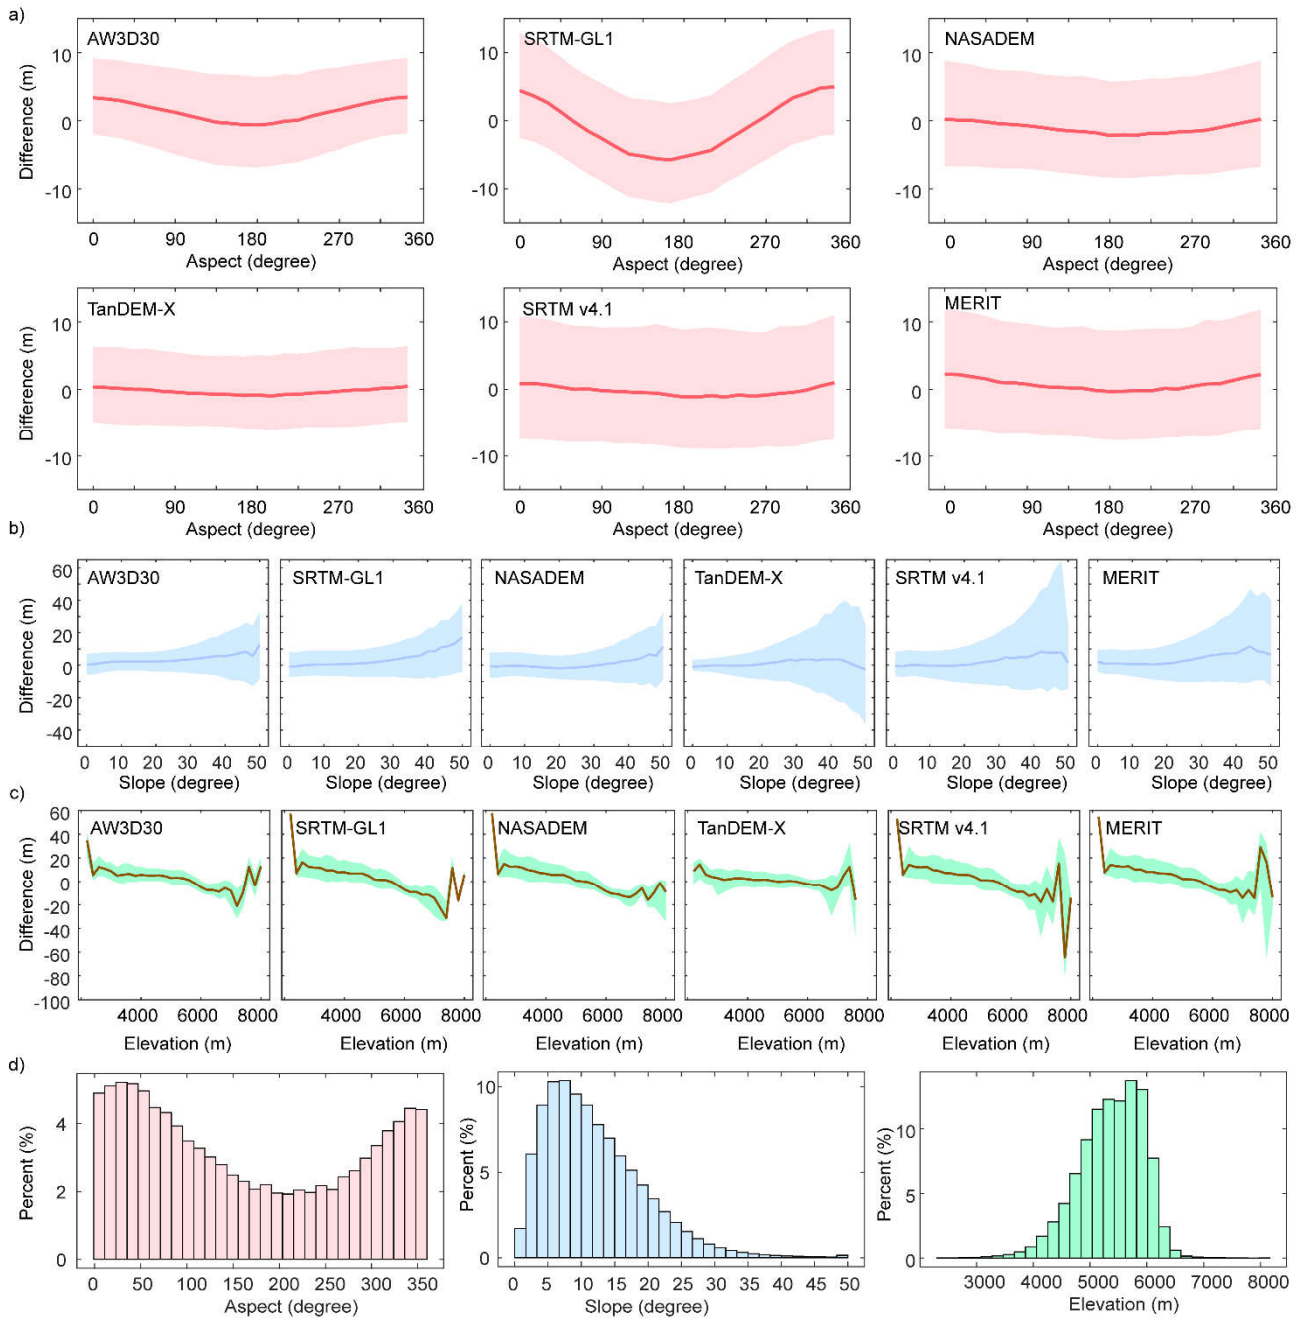

**Figure 6.** Differences between six DEMs and ICESat-2 with terrain factors. (a) 5° aspect bin. (b) 2° slope bin. (c) 200 m elevation bin. (d) Percentage (%) of data in each aspect, slope and elevation bin.

### 3.3 Differences between DEMs and ICESat-2 in different glacier zones

Differences in different glacier zones were also estimated and are shown in Figure 7a-d. We divided it into four sub-zones using the maximal, median and minimum elevation from the RGI glacier inventory (Fig. 7e). Here we consider Zone 1 to be the ablation area and Zone 4 the accumulation area. Zone 2 and Zone 3 are transition areas. Crests of the probability distribution of differences located in the ~~negative-positive~~ axis range in Fig. 7a move to the ~~right-left~~ in Fig. 7b-d. Correspondingly, ME, MAE and RMSE all decrease when moving from Zone 1 (ablation area) to Zone 2 (transition area) (Fig.7 and Table S1). Spatially, areas in the glacier terminus are subject to more melting (Brun et al. 2017) leading to this decrease. The ME of the SRTM based products SRTM-GL1, SRTM v4.1, NASADEM and MERIT are all around 10 m in Zone1 and decreased similarly by 8.71, 7.63, 87.15 and 7.82 m towards Zone2, respectively (Table S1). Temporally, the ~~values-ME~~ of the DEM acquired in earlier periods ~~decreased-is biggermore~~. The ME ~~decreased-by-a-larger-value (5.6 m) foris 8.1m for~~ AW3D30, which was acquired in 2006–2011, ~~thanbigger than~~ for that of TanDEM-X (3.59 m), which was acquired in 2010–2015.

ME, MAE and RMSE in Zone 3 and Zone 4, near or in the accumulation area, are almost all smaller than the corresponding values in Zone 1 and Zone 2 (Fig. 7 and Table S1). For TanDEM X and NASADEM, which have better absolute accuracy than the other DEMs, ME of all DEMs changed decreased to positive-negative values in Zone 3 and Zone 4. Usually, in the accumulation area, glaciers have a positive or less negative elevation change (Li and Lin 2017; Maurer et al. 2019; Rankl and Braun 2016), therefore, accumulation may be concerned with changes in Zone3 and Zone 4. The observed shift in the ME difference from zone 1 to zone 4 is a sign that of influence from thinning or accumulation between the time of collection of the six DEMs and the ICESat-2 data-is most pronounced in zones 1 and 2.

In terms of STD, NASADEM performed best in all glacier zones, except for Zone 3 and Zone 4, with values ranging from 9.28.8 to 1611.51 m (Table S1). AW3D30 had the best performance of all DEMs in Zone 1 and Zone 2, and was the next best performer overall, with an STD varying from 120.0 to 20.712.3 m. The STD of TanDEM-X was better than that of SRTM-GL1v4.1 and MERIT in Zone 1 and Zone 2, but was worse in Zone 3 and Zone 4 where it suffered from discrepancies. MERIT showed slight improvements in STD at -2% relative to SRTM v4.1.

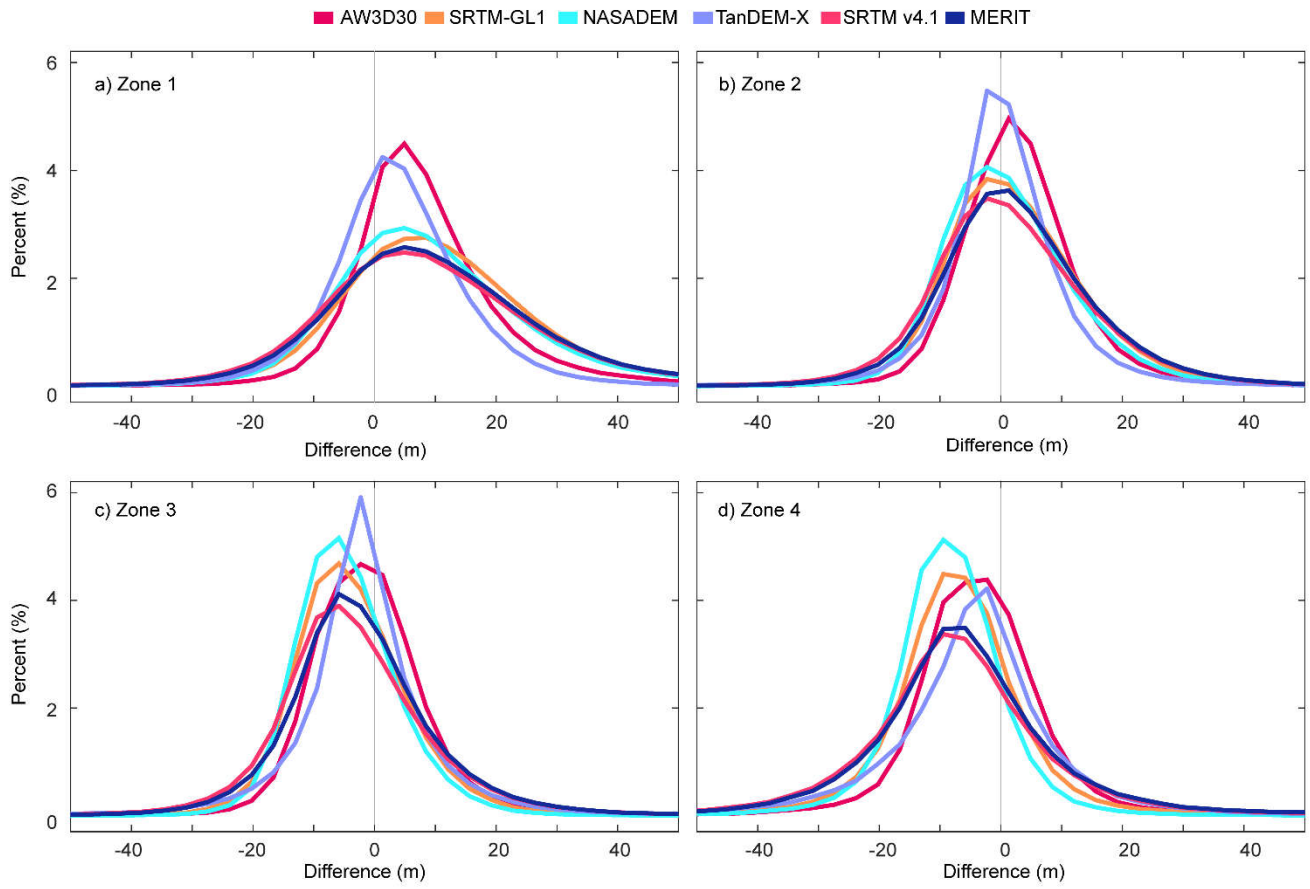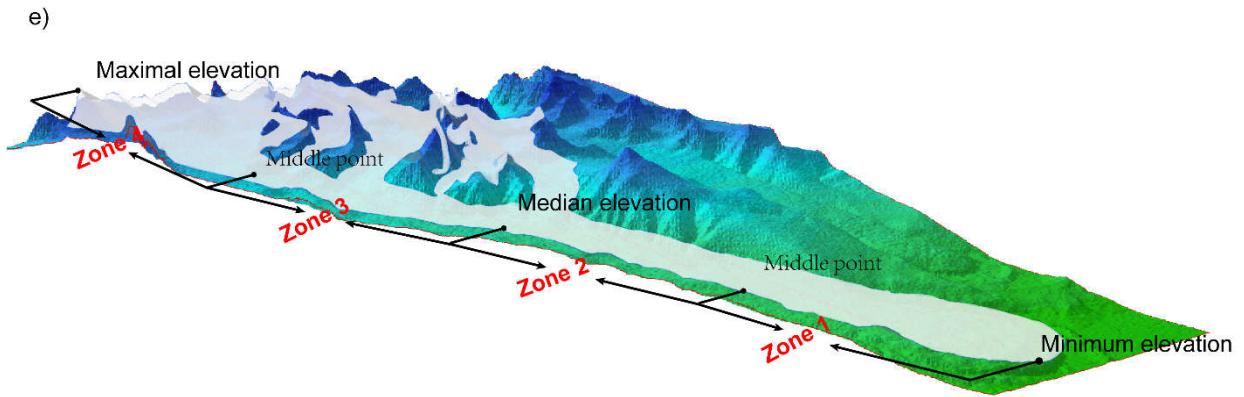

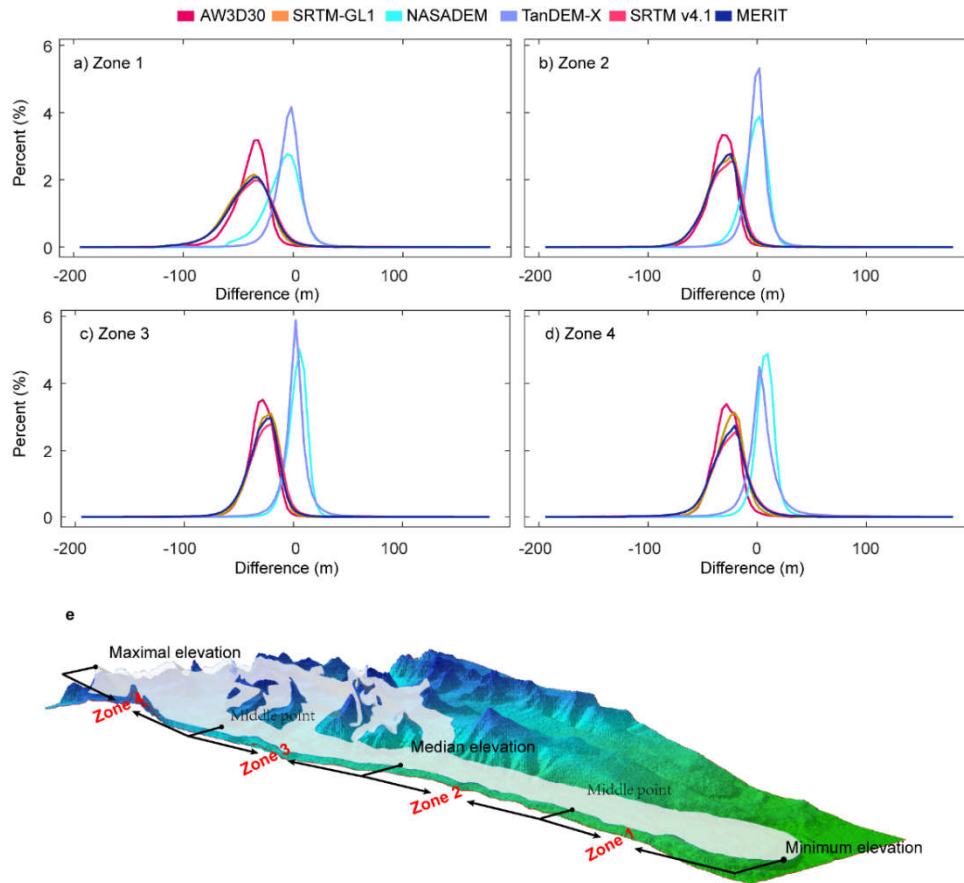

**Figure 7.** Probability distribution of the difference between six DEMs elevation and ICESat-2 elevation in different glacier zones (a–d) that defined in panel (e).

370 ~~ME, MAE and RMSE in Zone 3 and Zone 4, near or in the accumulation area, are almost all smaller than the corresponding values in Zone 1 and Zone 2 (Fig. 7 and Table S1). For TanDEM X and NASADEM, which have better absolute accuracy than the other DEMs, ME changed to positive values in Zone 3 and Zone 4. Usually, in the accumulation area, glaciers have a positive or less negative elevation change (Li and Lin 2017; Maurer et al. 2019; Rankl and Braun 2016), therefore, accumulation may be concerned with changes in Zone3 and Zone 4.~~

375 ~~In terms of STD, NASADEM performed best in all glacier zones, except for Zone 1, with values ranging from 9.2 to 16.5 m (Table S1). AW3D30 had the best performance of all DEMs in Zone 1, and was the next best performer overall, with a STD varying from 12.0 to 20.7 m. The STD of TanDEM X was better than that of SRTM GL1 in Zone 1 and Zone 2, but worse in Zone 3 and Zone 4 where it suffered from discrepancies. MERIT showed slight improvements in STD at 2% relative to SRTM v4.1.~~

### 380 3.4 Comparisons of ice thickness modelled by DEMs

The models are not adjusted independently according to the difference between the output and GPR results. Therefore, the results are not indicators of the performance of the models but rather references for examining the influence of different DEMs on specific ITIMs. The effect of the DEMs on the model outcomes are presented in Figure 8 and are quite obvious. Mean ice thickness differs, according to the DEM used, by up to ~~88~~13%, ~~46~~%, 47% and ~~7~~19% for GlabTop2, HF, ITIBOV and OGGM, respectively. The deepest ice thickness differs by up to ~~55~~53%, 25%, ~~16~~13% and ~~18~~13% for GlabTop2, HF, ITIBOV and OGGM, respectively.

The mean ice thicknesses from GlabTop2 and ITIBOV using the 90-m DEMs (~~that they are~~ TanDEM-X, SRTM v4.1 and MERIT) are ~30 m less than those obtained from using 30-m DEMs (that is AW3D, SRTM-GL1 and NASADEM) (Fig. 8). GlabTop2, HF and OGGM using AW3D30, and ~~HF and~~ ITIBOV using NASADEM output the maximal mean thickness. ~~GlabTop2 and ITIBOV using TanDEM-X, ITIBOV and OGGM using TanDEM-X,~~ and HF using SRTM-GL1 output the minimum mean thickness.

The influence of different DEMs on ITIMs can also be identified when making a comparison with the GPR results (Fig. 8 and Table 2). If the median error is used as the ~~criterion~~criteria, GlabTop2 ~~and using~~ITIBOV using NASADEM, HF using AW3D30, ~~ITIBOV using NASADEM~~ and OGGM using ~~NASADEM-SRTM v4.1~~ achieved the relatively best simulation (Fig. 9). If RMSE was used, GlabTop2 using NASADEM, HF using SRTM-GL1, ITIBOV using ~~NASADEM-AW3D30~~ and OGGM using TanDEM-X performed best (Table 2).

In different glacier zones, each DEM-model combination has its merits and weakness (Table 2). Totals of ~~98, 32, 47, 3, and 32 and 1~~ output achieved the minimum RMSE in profiles (Bold number in Table 2) by different ITIMs using AW3D30, ~~NASADEM, TanDEM-X and SRTM-GL1, NASADEM, and TanDEM-X and MERIT,~~ respectively. ~~Overall, Overall, NASADEM, as input to GlabTop2 and ITBOV, performs best, with RMSE values of 75.4 and 61.3 m, respectively; SRTM-GL1 performed the best in HF with an RMSE of 50 m; TanDEM X performed the best in OGGM with an RMSE of 52.8 m (Table 2), and AW3D30 performed better in different glacier zones in all models.~~

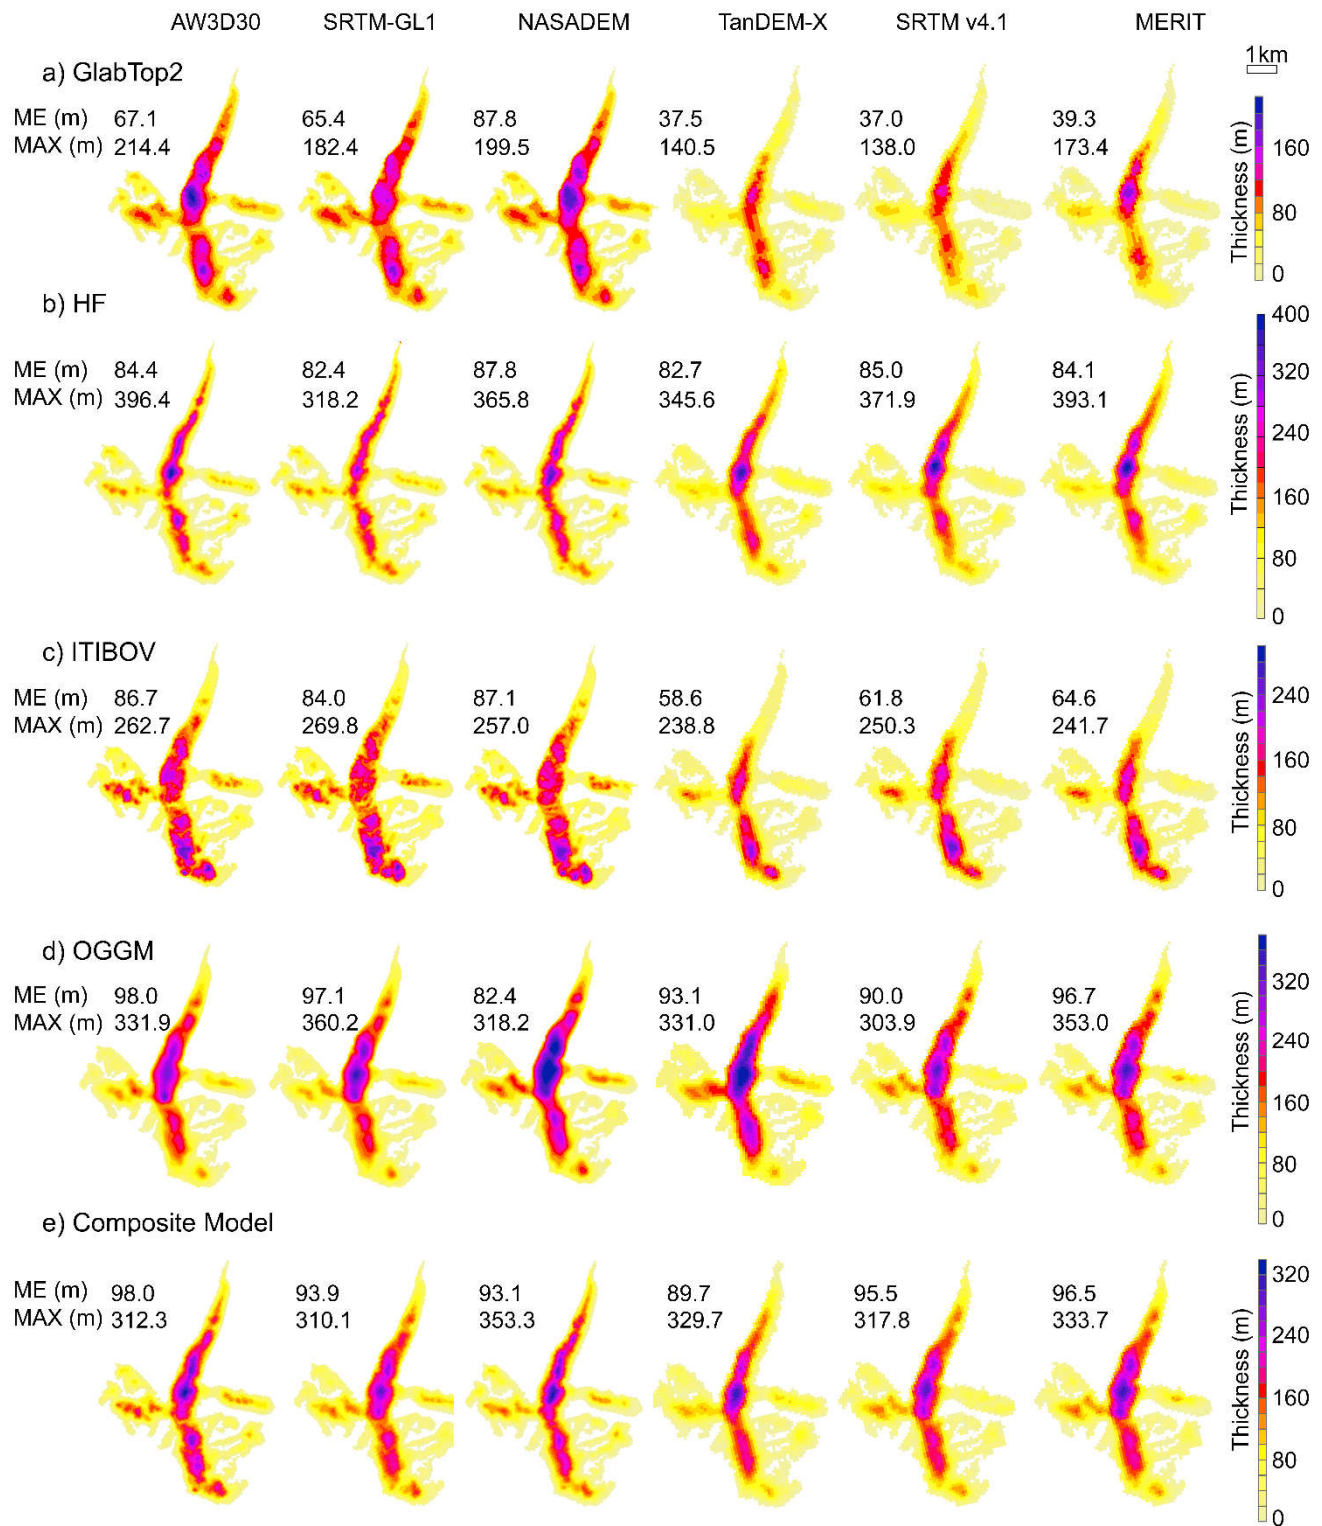

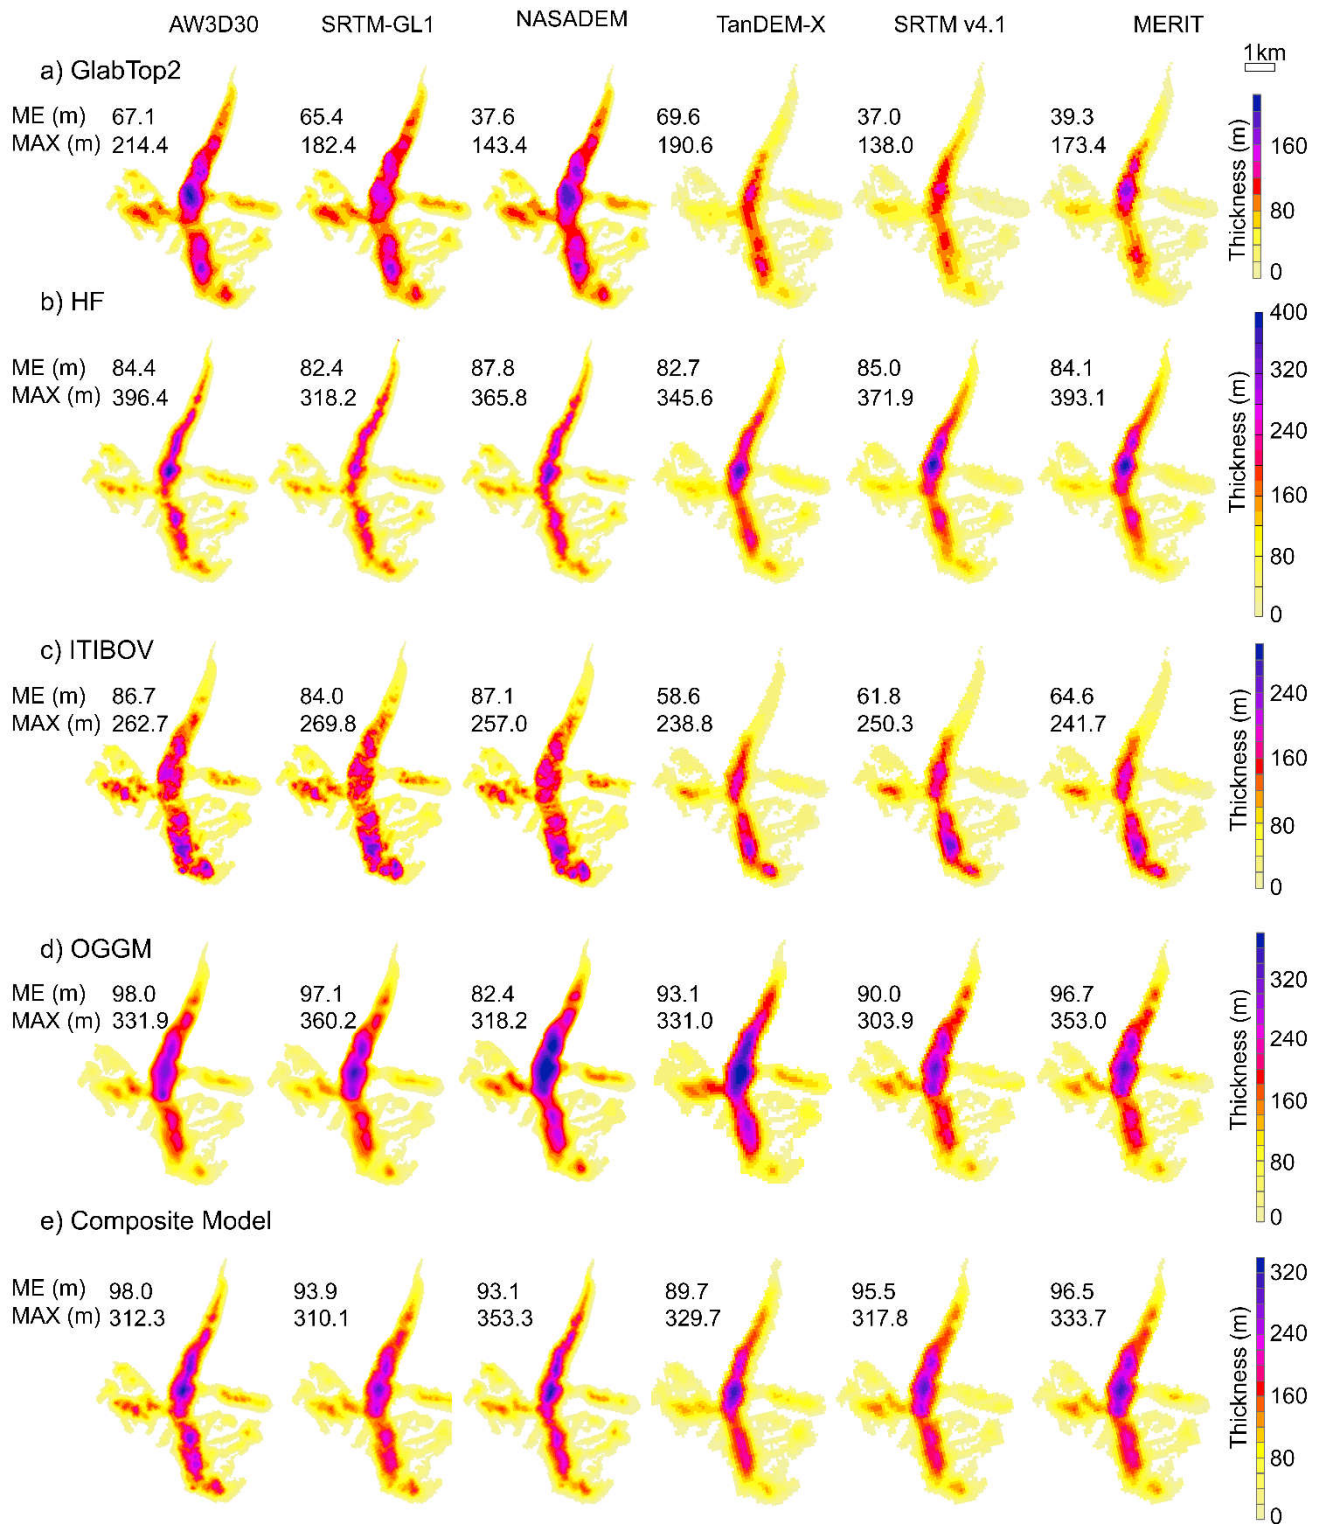



405 **Figure 8.** Distribution of modelled ice thickness of Chhota Shigri Glacier (location shown in Fig.1) using AW3D30, SRTM-GL1, TanDEM-X, SRTM v4.1, NASADEM and MERIT. (a) Glabtop2; (b)HF; (c) ITBOV; (d) OGGM; (e) composite result. Mean (ME) and maximum (MAX) modelled ice thickness are given in each panel.

410 Following As similar asto the procedure of Farinotti et al. (2017), results from the four models are further composed to achieve the minimum MAE between the modelled and GPR thicknesses (Fig. 8e). The weights for each model in ten experiments are shown in Table S2. After composition, the mean thickness using different DEMs ranged from 77-90 (acquired based on TanDEM-X) to 91-98 m (acquired based on NASADEMAW3D30). NASADEM and AW3D30 achieved minimum MAE, which are 36.7m and 44.1m, respectively. The thickness error of the results based on NASADEM is best (median value 2.3 m), followed by TanDEM X (median value 7.5 m). The minimum RMSE is for AW3D30 (45.9 m), followed by NASADEM with a RMSE of 47.7 m.The mean errors and median errors of all DEMs at the range of  $\pm 10$ m, except for that of AW3D30 and TanDEM-X at a level of around 20m. The spreads of error of 30-m DEMs are 33% smaller than those of 90-m DEM. Error spread from NASAM was minimum (75.1m), followed by AW3D30 (77.3 m).

415

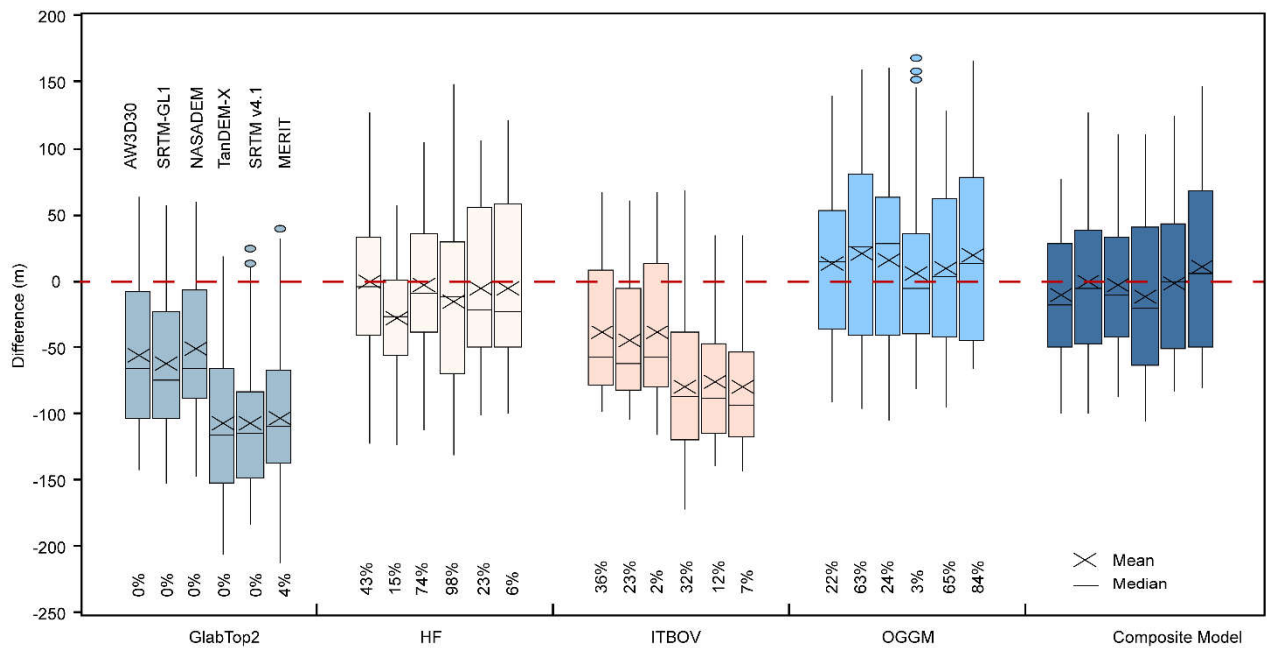

420 **Figure 9.** Point-by-point deviation comparison between the modelled and measured ice thickness from GlabTop2, HF, ITBOV, OGGM and the composite result. In each group, the boxes are plotted in the order: AW3D30, SRTM-GL1, NASADEM, TanDEM-X, SRTM v4.1 and MERIT. Different models using the same DEM are aggregated by weights (labeled/labelled at the bottom) to achieve minimum mean absolute error.

**Table 2** RMSE (m) of modelled ice thickness compared with ground penetrating radar (GPR) measurements on each profile. [The location of profiles are shown in Figure 1.](#) Bold numbers denote the best model performance on each profile [using different DEMs.](#)

| Model     | DEM       | No. of ground penetrating radar profiles |                     |                     |                     |                     | All         |
|-----------|-----------|------------------------------------------|---------------------|---------------------|---------------------|---------------------|-------------|
|           |           | <a href="#">pf1</a>                      | <a href="#">pf2</a> | <a href="#">pf3</a> | <a href="#">pf4</a> | <a href="#">pf5</a> |             |
| GlabTop2  | AW3D30    | 56.6                                     | 84.5                | <b>45.4</b>         | <b>102.4</b>        | 103.3               | 79.7        |
|           | SRTMG-GL1 | <b>54.8</b>                              | 94.6                | 62.4                | 104.3               | 90.6                | 83.3        |
|           | NASADEM   | 53.8                                     | <b>75.8</b>         | 48.5                | 104.6               | <b>84.4</b>         | <b>75.3</b> |
|           | TanDEM-X  | 103.5                                    | 143.3               | 104.8               | 137.0               | 115.0               | 122.0       |
|           | SRTM v4.1 | 101.9                                    | 133.6               | 93.2                | 132.3               | 135.1               | 118.7       |
|           | MERIT     | 110.0                                    | 120.7               | 70.9                | 154.7               | 132.2               | 118.1       |
| HF        | AW3D30    | <b>27.2</b>                              | 29.8                | 83.7                | 30.7                | 92.5                | 61.6        |
|           | SRTMG-GL1 | 28.4                                     | 58.4                | <b>33.3</b>         | 30.6                | 88.1                | <b>50.0</b> |
|           | NASADEM   | 37.2                                     | <b>26.5</b>         | 62.7                | <b>30.1</b>         | 82.2                | 51.8        |
|           | TanDEM-X  | 50.7                                     | 63.4                | 60.9                | 66.5                | <b>83.9</b>         | 65.4        |
|           | SRTM v4.1 | 49.3                                     | 36.4                | 74.9                | 44.8                | 86.4                | 61.3        |
|           | MERIT     | 51.4                                     | 33.6                | 87.6                | 42.4                | 86.2                | 65.8        |
| ITBOV     | AW3D30    | 69.3                                     | 61.9                | <b>45.6</b>         | <b>66.4</b>         | 70.8                | <b>61.4</b> |
|           | SRTMG-GL1 | 70.7                                     | 71.7                | 52.6                | 70.6                | 61.4                | 64.8        |
|           | NASADEM   | <b>67.3</b>                              | <b>61.3</b>         | 58.3                | 80.3                | <b>57.1</b>         | 65.3        |
|           | TanDEM-X  | 98.3                                     | 116.4               | 61.1                | 91.2                | 109.7               | 94.0        |
|           | SRTM v4.1 | 102.9                                    | 114.5               | 51.8                | 73.4                | 111.3               | 88.3        |
|           | MERIT     | 108.3                                    | 117.6               | 54.8                | 80.4                | 112.7               | 91.9        |
| OGGM      | AW3D30    | <b>32.0</b>                              | 47.2                | <b>80.5</b>         | 62.5                | <b>34.6</b>         | 58.9        |
|           | SRTMG-GL1 | 33.5                                     | 56.9                | 101.6               | 65.1                | 41.1                | 70.2        |
|           | NASADEM   | 32.2                                     | 55.3                | 92.3                | 68.8                | 43.6                | 67.1        |
|           | TanDEM-X  | 42.7                                     | <b>35.6</b>         | 86.1                | <b>52.2</b>         | 35.4                | <b>58.4</b> |
|           | SRTM v4.1 | 37.4                                     | 46.1                | 81.4                | 68.7                | 39.9                | 61.6        |
|           | MERIT     | 38.3                                     | 52.1                | 104.1               | 53.8                | 49.7                | 69.7        |
| Composite | AW3D30    | 37.2                                     | 27.9                | <b>44.4</b>         | 45.8                | 68.3                | <b>45.8</b> |
|           | SRTMG-GL1 | 39.1                                     | 29.8                | 64.3                | 63.3                | <b>47.5</b>         | 52.7        |
|           | NASADEM   | <b>34.9</b>                              | <b>22.1</b>         | 65.4                | <b>41.1</b>         | 70.6                | 51.3        |
|           | TanDEM-X  | 50.9                                     | 46.3                | 60.5                | 57.9                | 69.0                | 57.5        |
|           | SRTM v4.1 | 41.8                                     | 41.4                | 59.3                | 59.5                | 55.1                | 53.1        |
|           | MERIT     | 42.0                                     | 49.1                | 85.3                | 53.8                | 55.3                | 62.5        |

## 4. Discussion

### 4.1 Influence of glacier elevation change ~~Factors related to~~ the differences assessment of DEMs: ~~glacier elevation change, terrain~~

435 The identified extreme outliers (Fig. 3) are mostly located in the glacier terminus, high elevation and high slope regions (Fig. 10a–b). Extreme glacier melt, such as in ~~southeastern~~south-eastern Tibet, and surges, as observed in the Karakoram, can also lead to dramatic elevation changes, resulting in large differences (Fig. 10c). This glacier elevation change effect is also reflected in the spatial distribution of difference (Fig. 5), elevation bins (Fig. 6c) and glacier zones (Fig. 7). The differences at lower elevations are ~~negative~~positive, and generally ~~increase~~decrease with elevation, consistent with the fact that glaciers melt at

440 lower elevations and accumulate at higher elevations (Cuffey and Paterson 2010). The differences ~~in the NASADEM and TanDEM-X data~~ of in all DEMs with elevation and glacier zones comply with these features (Fig. 6c and Fig. 7). NASADEM was acquired in 2000 and TanDEM-X was acquired in 2010–2015, and the value of NASADEM is more ~~negative~~positive than TanDEM-X in the ablation zone, ~~as would be expected~~. ~~By making a comparison between SRTM-GL1 and NASADEM from the same original data, we conclude that the negative differences of the other four DEMs through the elevation bins may~~

445 ~~be related to absolute vertical shift. MERIT shows less improvement over SRTM v4.1 in glacierized terrain than in the flat regions in terms of both absolute and relative accuracy (Yamazaki et al. 2017).~~ The relatively more ~~negative~~positive and larger values of ME and STD along the Hindu Kush-Himalaya, southern Tibet (Fig. 5) and negative ME values in the West Kunlun and Karakoram and in glacier zones (Fig. 6~~5~~) are also related to glacier elevation change (Hugonnet et al. 2021)(Hugonnet et al. 2021).

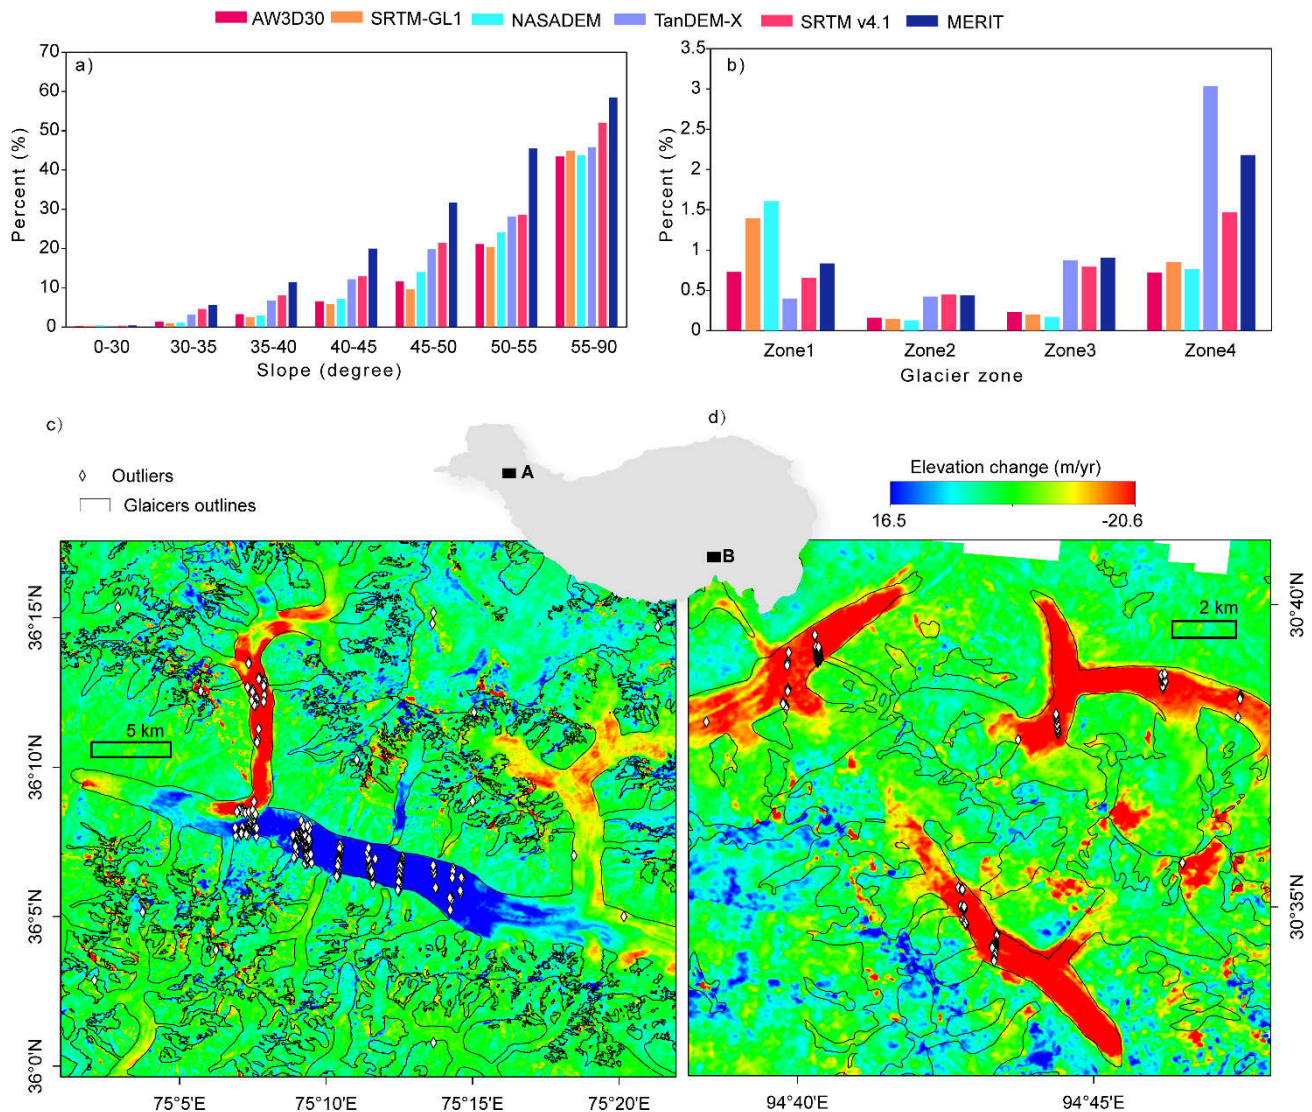

450

**Figure 10.** Distribution of excluded extreme outliers. The proportion of outliers accounting for the total number in slope bins (a) and each glacier Zone (b). Examples of locations of excluded points overlaid with glacier surface elevation change in the Karakoram (c) and southern TP (d). Locations of these two examples are labelled A and B in the central insert. Glacier elevation change data covering 2000–2019 is from Shean et al. (2020).

455

**Table 3** Comparisons of differences between four SRTM based DEMs and ICESat-2 elevation over glacier zones before and after adjustment. ICESat-2 data acquired in February are used to calculate the differences. Glacier zones are defined according to Fig. 8e.

| Item                | Zone | Before (m) |         |           |       | After (m) |         |           |       |
|---------------------|------|------------|---------|-----------|-------|-----------|---------|-----------|-------|
|                     |      | SRTM-GL1   | NASADEM | SRTM v4.1 | MERIT | SRTM-GL1  | NASADEM | SRTM v4.1 | MERIT |
| Mean error          | 1    | 27.8       | 26.6    | 23.9      | 27.4  | 13.4      | 12.1    | 9.7       | 12.8  |
|                     | 2    | 10.0       | 9.1     | 8.3       | 10.5  | 2.9       | 2.0     | 1.7       | 3.6   |
|                     | 3    | -0.2       | -0.8    | 0.7       | 1.7   | -3.5      | -3.9    | -2.2      | -1.4  |
|                     | 4    | -12.4      | -12.0   | -8.5      | -6.0  | -9.3      | -10.1   | -7.5      | -5.3  |
| Absolute mean error | 1    | 33.8       | 33.0    | 36.3      | 34.3  | 17.8      | 16.8    | 20.5      | 18.5  |
|                     | 2    | 16.4       | 16.1    | 19.0      | 18.0  | 9.0       | 8.6     | 11.9      | 10.9  |
|                     | 3    | 11.2       | 10.8    | 14.4      | 13.8  | 8.3       | 7.7     | 11.6      | 10.7  |
|                     | 4    | 18.0       | 16.0    | 23.4      | 20.6  | 13.0      | 12.1    | 19.6      | 16.9  |
| Standard deviation  | 1    | 37.7       | 37.9    | 53.5      | 39.4  | 20.3      | 20.3    | 40.1      | 22.8  |
|                     | 2    | 20.6       | 20.8    | 36.1      | 26.8  | 12.0      | 11.6    | 29.2      | 21.8  |
|                     | 3    | 14.6       | 14.5    | 23.7      | 22.7  | 10.7      | 9.8     | 20.7      | 19.3  |
|                     | 4    | 29.6       | 27.4    | 39.5      | 29.4  | 20.9      | 20.8    | 36.9      | 26.0  |
| RMSE                | 1    | 46.9       | 46.3    | 58.6      | 48.0  | 24.3      | 23.7    | 41.2      | 26.2  |
|                     | 2    | 22.9       | 22.7    | 37.0      | 28.8  | 12.4      | 11.8    | 29.2      | 22.1  |
|                     | 3    | 14.6       | 14.5    | 23.7      | 22.7  | 11.3      | 10.6    | 20.8      | 19.4  |
|                     | 4    | 32.1       | 29.9    | 40.4      | 30.0  | 22.9      | 23.2    | 37.6      | 26.6  |

460 After ~~error correction removing the glacier elevation change~~, using the glacier elevation change dataset covering 2000–~~2019~~  
~~2018~~ (Shean et al. ~~2019~~2020), ~~the mean difference in Zone 1 and Zone 2 decreased sharply by ~13–14 m and ~7 m for the~~  
~~SRTM based DEMs, respectively.~~ ~~The ME of NASADEM reached as low as 0.1 m in Zone 1 (Table 3).~~ ~~Improvements are~~  
~~also obvious along the elevation profiles of the four glaciers selected across the TP shown in Fig. 11. Before correction, the~~  
~~ICESat 2 elevation is lower than DEMs elevation in Fig. 11a–c and higher in Fig. 11d. After correction, the ICESat 2 and~~  
465 ~~NASADEM profiles nearly overlap.~~ However, similar improvements are not obvious in Zone 3 and Zone 4. This may be  
related to the slight elevation change in the accumulation region (Brun et al. 2017; Shean et al. 2020), and high uncertainty  
due to steeper slopes and higher elevations (Fig. 6b–c). MAE, STD and RMSE all improved a lot in four regions after this  
adjustment.

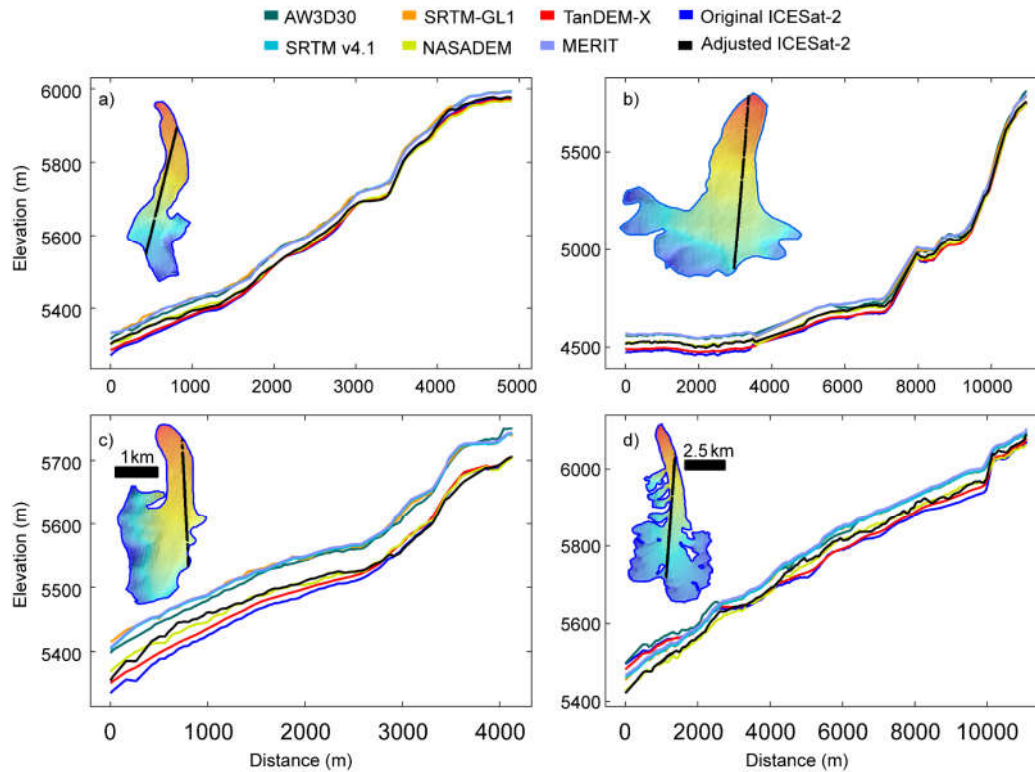

470 **Figure 11.** Elevation profiles of the original and adjusted six DEMs and ICESat-2 along the ICESat-2 tracks on four selected glaciers across the study region. Locations of glaciers in a–d are labelled 1–4 in Fig. 1, respectively.

ICESat-2 data covering the period from October 2018 to October 2020 repeat every 91 days. Therefore, variations of ICESat-2 elevation data caused by glacier fluctuations have influenced the error statistics (Fig. 12a11a). Precipitation on the TP mainly occurs in June–August (Maussion et al. 2014). Hence, after precipitation accumulation on glaciers in spring and summer, the elevation have increased, and the mean difference decreased. With little accumulation, the glacier melt and sublimate in autumn and winter (Li et al. 2018), the glacier surface elevation meaning decreased; then the mean difference elevation, and an increase in the mean difference. However, the magnitude of these changes is much smaller, at a level of less-fewer than 3 m (Fig. 1211a), compared with the large ME, MAE and RMSE magnitude of most of the DEMs (with the exceptions of TanDEM-X and NASADEM) (Fig. 4). When taking all points from different seasons into consideration, the ICESat-2 dataset gives average elevation over the 2018-2020 period, the seasonal effects could also partly cancel each other out. If only the ICESat-2 data from February was used (Table 3), NASADEM and TanDEM-X still perform better than others. Therefore, we conclude that the seasonal fluctuations of ICESat-2 data have no-little influence on the performance-assessments of the DEMs. Additionally, the atmospheric forward scattering and subsurface scattering of ICESat-2 photons, which are not quantified in ATL06 due to lack of ancillary data, may also lead to a biased estimate of elevation (Smith et al. 2019).

475  
480  
485

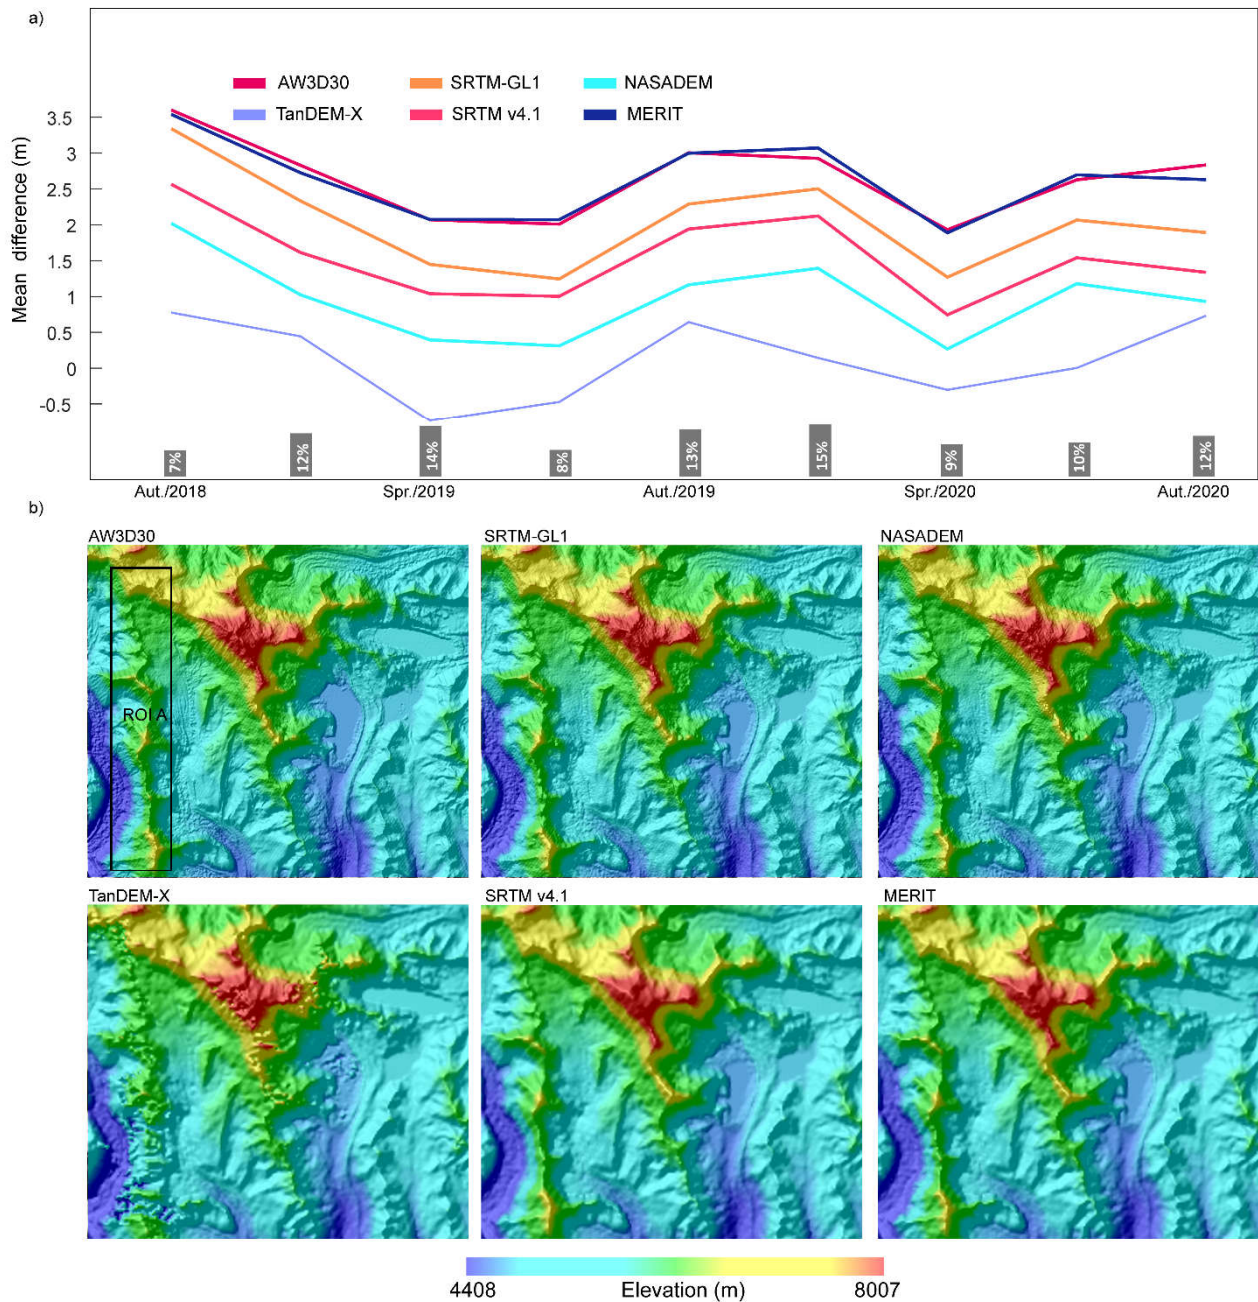

**Figure 1211.** Influence on elevation differences between ICESat-2 and six DEMs from glacier elevation change and terrain factors. (a) Mean absolute difference between six DEMs and ICESat-2 in different seasons during 2018–2020. The spring, summer, autumn, and winter are defined as March–May, June–August, September–November and December–February,

490 respectively. The histogram at the bottom shows the percentage of the total number of points in each season. (b) Examples of  
elevation and shaded relief of six DEMs in the Shisha Pangma region. The rectangle denotes the area of interest.

#### 4.2 Influence of terrain on the assessment of DEMs

495 The elevation differences have a strong dependence on terrain factors (Fig. 7a6a–b). The differences with aspect show  
contrasting features to the distribution of measurements in different aspects (Fig. 7d6d). The largest errors are concentrated in  
the north aspect, as was also reported in previous studies (Gorokhovich and Voustianiouk 2006; Shortridge and Messina 2011),  
in which they were attributed to the orientation of the sensor (Gdulová et al. 2020; Shortridge and Messina 2011). However,  
here, the data from different sensors all show this aspect dependence, and we infer that it may be related to the accordant  
distribution of data in different slopes with aspect. There are many more measurements with steeper slopes in the north aspect,  
and ~~less~~ fewer measurements with flatter slopes in the south aspect (Fig. 1312). The error and spread become larger with  
steeper slopes (Fig. 7b), as also reported by Liu et al. (2019) and Uemaa et al. (2020), which may be due to geometric  
500 deformation or shadow (Liu et al. 2019). Therefore, the error variation with aspect tends to be related to steeper slopes  
(Gdulová et al. 2020; Gorokhovich and Voustianiouk 2006).

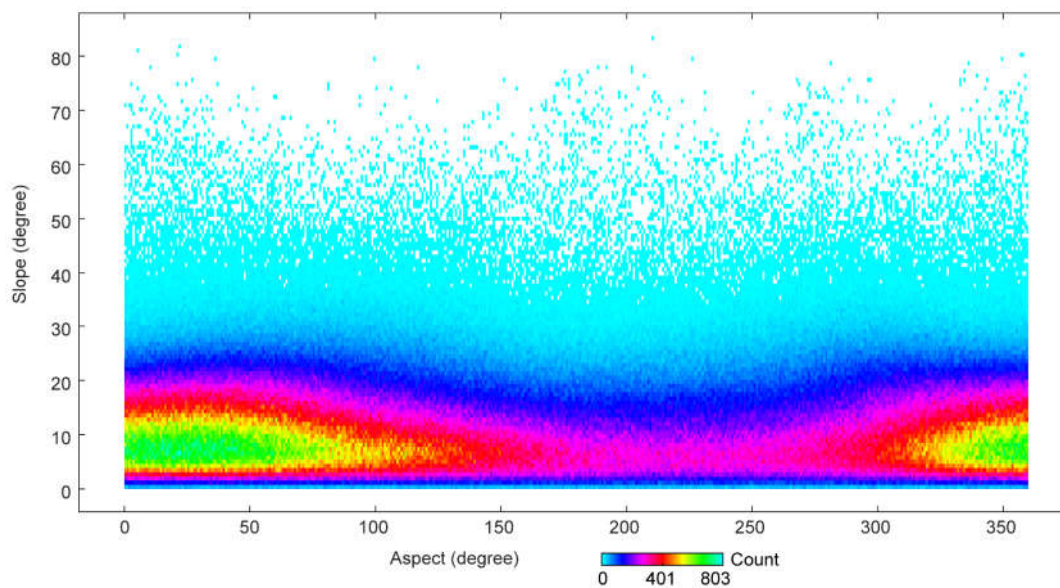

505 **Figure 1312.** Distribution of measurements in different ~~slopes~~ aspects against the with aspectslope.

Though points in the 55°–90° slope region account for a small fraction (Fig. 6d), almost half the points in the 55°–90° slope  
region are identified as extreme outliers (Fig. 10a). Differences also show large discrepancies for all DEMs in the steeply  
sloping regions where voids and large errors are frequent (Falorni 2005). Steep slopes combined with low resolution led to



510 variations in the spread of differences in Fig. 6b. Spreads of differences were larger on steep slopes for the 90-m DEMs than those of the 30-m DEMs. Intra-pixel variation aggravates this effect in steeply sloping regions (Uuemaa et al. 2020), lower resolution or reduced pixel DEMs smooth the terrain details and lead to inaccurate elevation compared with the 20-m footprint of ICESat-2 points. The spread and the number of outliers gradually increased with the slope, especially for the TanDEM-X case (Fig. 7b). Using the terrain in the rugged Shishapangma region (Fig. 12b) as an example, we can see that the elevation  
515 from TanDEM-X suffers from serious errors along the ridge at high elevations with the output almost blurred. Even so, TanDEM-X still has overall accuracy advantages over SRTM v4.1 and MERIT, indicating the high quality of TanDEM-X in low relief regions (Fig. 7b).

#### 4.3 Influence of misregistration on the assessment of DEMs

520 Pixel of different DEMs at the same location may mismatch each other. This mismatch Misregistration among DEMs, which has been ignored in previous research (González-Moradas and Viveen 2020; Liu et al. 2019), is an important error source when looking at DEM differences (Hugonnet et al. 2021; Van Niel et al. 2008). This study intends to give direct insights about into  
525 the quality of uncorrected DEM products, so the misregistration problem was not tackled before the evaluations were carried out. However, the influence of misregistration was evaluated. According to the sinusoidal relationship between aspect and error differences between two DEMs (Van Niel et al. 2008), using the co-registration method in Nuth and Kääb (2011) and ICESat-2 points outside the glaciers, offset pixels relative to ICESat-2 in x- and y- direction at the  $1^\circ \times 1^\circ$  grid scale were estimated by fitting method in MATLAB across the TP ~~(Fig. 14)~~. Misregistration was found to be less than one pixel-grid spacing (Figure 4413). The offset pixel of SRTM-GL1 relative to ICESat-2 is the largest; offset pixels of the other DEMs are all at less than 0.2 pixels. Considering that only the cell centre value was used, the sub-pixel shift may have little influence  
530 ~~(Van Niel et al. 2008)(Van Niel et al. 2008).~~

A comparison of errors before and after correcting sub-pixel misregistration confirms this conclusion (Fig. 15b).

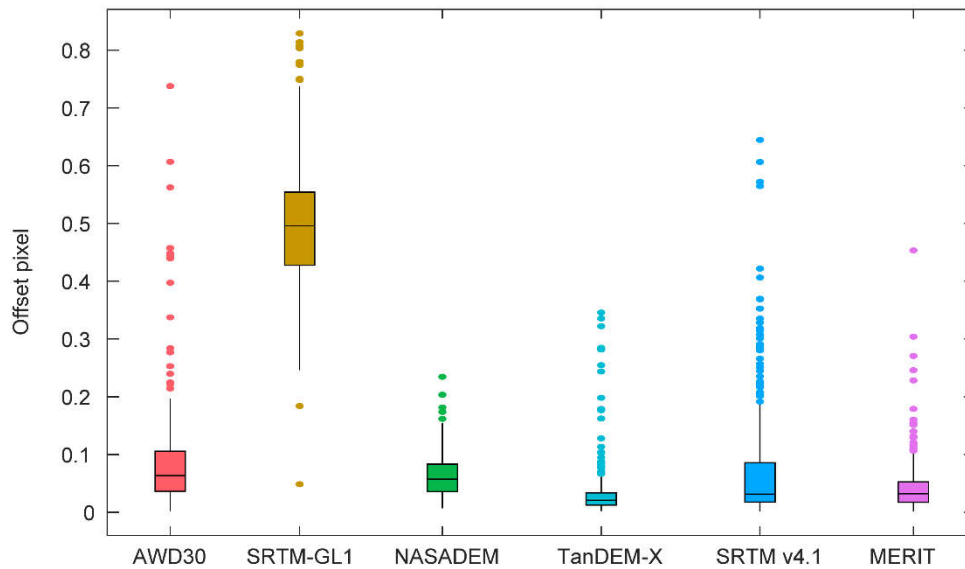

**Figure 1413.** Distribution of offset pixels of DEMs relative to ICESat-2 on a  $1^\circ \times 1^\circ$  grid. Only [the](#) grid squares with  $R^2$  greater than 0.5 and [the number of record](#) greater than 1000 are considered.

~~Misregistration was found to be worst in eastern Kunlun Mountains and Qilian Mountains where only a small number of glaciers developed (Fig. 1) and was slight in the south of the TP. All the DEMs mismatch by less than one pixel, except for AW3D30, which had the worst misregistration in the north and inner TP (Fig. 14). Considering that only the cell center value was used, sub-pixel shift may have little influence. A comparison of errors before and after correcting sub-pixel misregistration confirms this conclusion (Fig. 15b). The probability distribution of difference before and after co-registration was almost the same, as were ME, MAE, STD and RMSE (Table S2). However, examples of pixel misregistration strongly affected the probability distribution, except for AW3D30, SRTM-GL1, SRTM v4.1 and MERIT (Fig. 15a); STD changed by 1–3 m, while ME, MAE and RMSE changed by less than 1.2 m (Table S2). The probability distribution symmetry varies. Hence, we supposed that the symmetry variations of difference compensate the effect of offset. Since glaciers are distributed among the mountains with different aspects, if we shift the DEM in the x and y directions, the increased differences would be compensated for by decreased elevation differences (Fig. 15c). Therefore, the large errors remaining in these four DEMs should be due to systematic deviations (Han et al. 2021), rather than the influence of misregistration.~~

#### 4.4 Influence of DEMs on ice thickness estimated by ITIMs

~~Even with the same parameters, the same model using different DEMs have different outcomes (Figure 8 and 9). The DEM indeed influence the performance of the ITIMs. However, [T](#)he different models have various levels of robustness to the quality~~

of the input DEMs. Different DEMs resulted in differences in ~~ITIM-maximal and minimum mean ITIM~~ ice thickness ~~with at~~ a range of ~~32-65%~~ 3.6-32 m (Fig. ~~108~~).

555 Generally, the outcome with GlabTop2 and ITBOV using 30-m DEMs is 51% and 43% better than with the 90-m DEMs, ~~within mean error differences of 52% and 45%, respectively. This is different from the conclusion that improving only DEM resolution, without calibrating the shape factor, did not benefit the model result in GlabTop2 (Ramsankaran et al. 2018). But when we used a calibrated shape factor of 0.66 as suggested by Ramsankaran et al. (2018), the model results from the 30-m DEMs were still better than those from the 90-m DEMs (Fig. 16a).~~ With GlabTop2, elevation data was used to determine not  
560 only the slope, but also the shear stress (Frey et al. 2014). An error of +5° ~~error~~ in slope caused more than a -34.1 % difference in the output for slopes of less than 20°. Additionally, relative elevation errors had an enormous impact (Fig. ~~16-14 eb~~ 16-14 eb). For glaciers with an elevation range of less than 400 m, which accounted for 41% of the total number and 5% of the total area over the TP, +10, +30, and +50 m errors in elevation range caused more than +2%, +6% and +10% differences in output. Such errors in elevation range had greater influence (Fig. ~~19b14b~~ 19b14b), especially for small glaciers, which have smaller elevation ranges.  
565 These two errors propagate and lead to a much larger overall error (Table 3). Thus, GlabTop2 with NASADEM and AW3D30 as the best quantity input achieved the best RMSE in comparison with GPR measurements. In contrast to the other ITIMs, the ITIBOV model directly estimated the ice thickness at each grid cell according to cell velocity information without interpolation. The slope sensitivity of ITIBOV is higher than that of GlabTop2, with an error of +5° ~~error~~ in slope causing more than a -71.4% difference in the output for slopes of less than 20° (Fig. ~~16b14a~~ 16b14a). The flatter the slope, the more sensitive ITIBOV is to the slope error (Fig. ~~16b14a~~ 16b14a). Although along- and across-track slope data are provided in the ICESat-2 ATL06 product, they are incompatible with the slope estimated from DEMs due to their different data formats and algorithms used (Burrough and McDonell 1998; Smith et al. 2019). Moreover, the surface terrain of glaciers changes with time due to accumulation, melting and motion (Dehecq et al. 2018; Shean et al. 2020). Nevertheless, the accuracy of the DEMs estimated here could also provide some information about slope accuracy. When the better relative accuracy of NASADEM and AW3D30 means that ITIBOV with these DEMs as input of ITIBOV led to the relatively best outcomes (Table 2).  
570

575 For HF and OGGM, the modelled results did not show large differences when 30-m DEMs ~~were replaced compared to~~ with 90-m resolution DEMs (Fig. 9): means that high spatial resolution improved the outcome little (Pelto et al. 2020). For the HF model, elevation data was used for convergence calculation of apparent mass balance and mean slope in elevation bins (Farinotti et al. 2009; Farinotti et al. 2019), whereas, for OGGM, it is used to extract flowlines, shear stress at flowlines and mass balance at an elevation (Maussion et al. 2019). These two models show good roughness to the input DEM (Fig. 14a). ~~The relative accuracy of DEMs was more vital than absolute accuracy for these two models.~~ Although NASADEM and TanDEM-X had the large advantage of ~~absolute~~ accuracy, the output of HF and OGGM using these two DEMs did not have much advantage over that using the other DEMs (Fig. 9). The STD of RMSE values for HF and OGGM using six DEMs are ~~7.06.2~~ 7.06.2 and ~~6.14.9~~ 6.14.9 m, respectively (Table 2). STD of mean ice thickness by HF and OGGM using six DEMs are 1.1 and ~~1.96.0~~ 1.96.0 m (Table-Fig.2.8). ~~The HF and OGGM models are not very sensitive to the DEM absolute accuracy. The performance of AW3D30 in OGGM and SRTM-GL1 in HF is even slightly better than NASADEM in these two models (Table 2). Specifically,~~  
580  
585

the better performance of SRTM-GL1 should be attributed to the calculation of slope. Though the model has high sensitivity to the slope (Fig. 116a4a), the mean slope in each elevation band was used, defined as a tangent of the width and elevation difference in the elevation bin (Huss and Farinotti 2012).

590 ~~The different models have various levels of robustness to the quality of the input DEMs. When the results from different models are ensembled, the influence of the input DEM manifests (Fig. 9 and Table 2). The RMSE of ITIMs from 30-m DEMs was 16.8% less than that from 90-m DEMs. Models using AW3D30 and NASADEM, equipped with higher resolution and better accuracy, achieved the best outcomes. However, glacier surface elevation changes with climate, AW3D30 acquired in different years and seasons represents glacier terrain in different periods. This could result in the discord of the output of ITIMs.~~  
595 Above, we suggest NASADEM as the best input of -ITIMs for ice-thickness estimates over the TP. This conclusion is of significance for ice thickness inversion models using DEMs in TP. However, it should be noted that the result may be not suitable for studies in other glacierized mountainous regions. Because various errors exist in DEMs, such as speckle noise, stripe noise and absolute bias; they behave differently across the Earth (Yamazaki et al. 2017; Takaku et al. 2020). But our method to assess the accuracy of DEMs is repeatable in different regions, combineding with the recently released  
600 glacier elevation change data on Earth (Hugonnet et al. 2021). What's more, benefiting from the high accuracy and dense coverage of ICESat-2 data, the quality of DEMs can also be improved as similar as the production of MERIT (Yamazaki et al. 2017). For example, the misregistration in DEMs could be corrected and terrain-related errors could be reduced by unitizing the relation of difference against slope, aspect and elevation in Fig. 6.

605

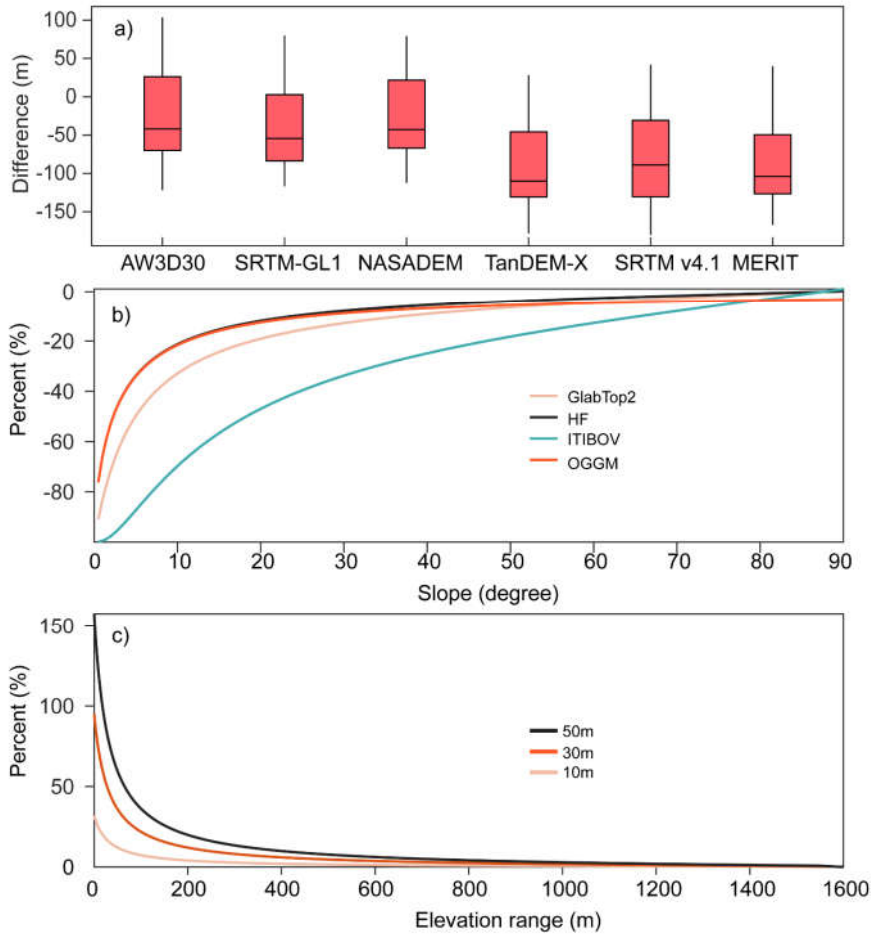

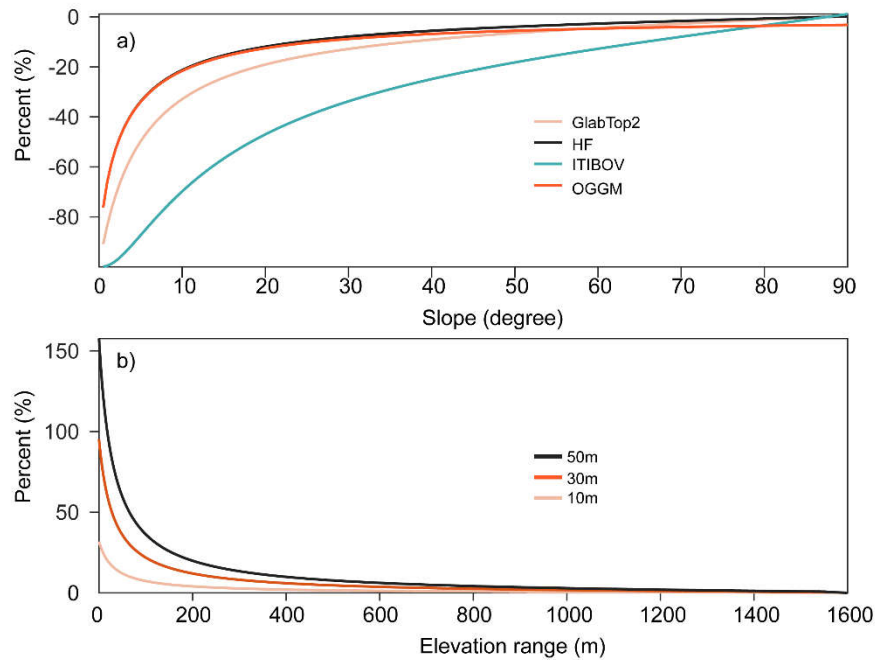

**Figure 1614.** Sensitivity test of ~~shape factor~~, slope and elevation on ice-thickness inversion models. ~~(a) Difference between modelled thickness and GPR measurements when a calibrated shape factor of 0.66 was used in GlabTop2;~~ ~~(b)~~ Percentage difference of modelled ice thickness from GlabTop2, HF, ITIBOV and OGGM when there is +5° slope error; ~~(e)~~ Percentage difference of modelled ice thickness from GlabTop2 when the elevation range error is +10, +30 and +50 m for different elevation ranges.

~~(Fielding et al. 1994; Liu et al. 2019)~~

~~The different models have various levels of robustness to the quality of the input DEMs. When the models are comprehensively utilized, the influence of the input DEM manifests itself (Fig. 9 and Table 2). The RMSE of ITIMs from 30-m DEMs was 16.8% less than that from 90-m DEMs. Models using AW3D30 and NASADEM, equipped with higher resolution and better relative accuracy, achieved the best outcomes. However, it should be noted that the large misregistration in AW3D30 in the northern TP may lead to the mismatch between terrain and glacier outlines. This will lead to an overestimation of slope and a consequential underestimation of ice thickness (Huss and Farinotti 2012), due to the mountain terrain being relatively steeper than the glaciers.~~

## 5. Conclusions

In the present study, six DEMs (~~i.e. that is~~ AW3D30, SRTM-GL1, NASADEM, TanDEM-X, SRTM-GL1 and MERIT) from different sensors with different spatial resolutions were evaluated using ICESat-2 data. The influence of glacier dynamics, terrain and misregistration on the DEM accuracy were analysed. Out of the three 30-m DEMs, NASADEM was the best

625 performer in vertical accuracy with ~~an a small~~ ME of ~~-1.00.9 m~~ and an RMSE of 12.6 m. Out of the three 90-m DEMs, TanDEM-X performed best with an ME of ~~\_-0.1~~ and an RMSE of 15.1 m. The quality of TanDEM-X was stable and unprecedented on shallow slopes, but suffered from serious problems on steep slopes, especially along the steep ridges. ~~For AW3D30, a systematic vertical and horizontal offset existed on glacier terrain, however, it still~~ has a similar relative accuracy to NASADEM, and is even better in STD, MAE and RMSE when not considering the effect of glacier dynamics. SRTM-based  
630 DEMs (~~i.e. that is~~ SRTM-GL1, SRTM v4.1 and MERIT) (~~~36-15 m~~ RMSE) were inferior to NASADEM, ~~although, when influence of glacier variations werewas excluded, all of their errors were reduced in the ablation zone~~. MERIT shows little improvement over SRTM v4.1 in glaciated terrain. The influence of glacier elevation change on the elevation difference is larger for DEMs acquired in earlier period, at low elevations and in the ablation region. However, this does not influence the conclusion that NASADEM performed the best, followed by TanDEM-X but with serious outliers in the high elevation -region.  
635 For all the DEMs, the errors increased from the south-aspect slope to the north-aspect slope, controlled by the increasing error with slope. Misregistration errors in the glacier-~~rich~~ region are mostly within one pixel grid spacing, benefiting from the 20 m footprint of ICESat-2, relative to the 30- or 90 m resolution DEMs, and only have ~~a small~~ little influence on the evaluation benefiting from the 20 m footprint of ICESat-2 relative to the 30- or 90-m resolution DEMs.

The effect-influence of DEM accuracy on ice-thickness inversion models depends on the model properties. Generally, a  
640 higher resolution DEM was helpful for better model outcomes due to the intra-pixel influence. ~~For~~ The widely used GlabTop2 model, ~~which is~~ very sensitive to the accuracy of both elevation and slope, ~~using NASADEM, with the highest absolute accuracy,~~ as the input, facilitated the best outcome. Although the OGGM and HF models are less sensitive to the quality of DEM, the use of NASADEM or AW3D30, ~~both with a high relative accuracy,~~ was still ~~favorable~~ beneficial/favourable. Among the four ice-thickness inversion models, ITIBOV was the most sensitive to slope accuracy. Ice-thickness inversion models  
645 using AW3D30 or NASADEM as input gave the best outcomes. These two DEMs also perform the best when four ice-thickness inversion results were aggregated by the minimum MAE optimization method to form an ensemble.

Considering the influence of inconsistency in data acquisition time on generating glacier terrain, we suggest that NASADEM is the best choice for ice-thickness inversion models over the TP. AW3D30 could be a good substitute ~~if its systematic shift was corrected~~ limited by their mixed acquiring dates. TanDEM-X is an appropriate alternative for glaciological research  
650 focusing on the flat glacier terminus, but it requires further improvement for use in steep terrain or ~~for~~ ice-thickness inversion.

### Code/Data availability

~~ICESAT~~ICESat-2 ATL 06 is available at <https://nsidc.org/data/atl06> (Accessed 2021-10-19); AW3D30 is available at [https://www.eorc.jaxa.jp/ALOS/en/\\_aw3d30/index.htm](https://www.eorc.jaxa.jp/ALOS/en/_aw3d30/index.htm) (Accessed 2021-10-19); SRTM-G11 is available at <https://earthexplorer.usgs.gov/> (Accessed 2021-10-19); NASADEM is available at <https://search.earthdata.nasa.gov/> (Accessed 2021-10-19); TanDEM-X 90m is available at <https://download.geoservice.dlr.de/TDM90/> (Accessed 2021-10-19); SRTM v4.1 is available at [https://drive.google.com/drive/folders/0B\\_J08t5spvd8RWRmYmtFa2puZEE](https://drive.google.com/drive/folders/0B_J08t5spvd8RWRmYmtFa2puZEE) (Accessed 2021-10-19)

19); MERIT is available at [http://hydro.iis.u-tokyo.ac.jp/~yamada/MERIT\\_DEM/](http://hydro.iis.u-tokyo.ac.jp/~yamada/MERIT_DEM/) (Accessed 2021-10-19); Glacier elevation change data is available at <https://zenodo.org/record/3600624> (Accessed 2021-10-19). The code for processing the ICESat-2 data are available at <https://github.com/cnugis/ProcessICESat-2>. The database containing elevation, slope and aspect and some other fields in MATLAB mat format is available at <https://zenodo.org/record/5267309>.

### Author contribution

W.F Chen, T.D Yao and GQ. Zhang designed the outline of this study. W.F Chen processed the data and make all the figures. Fei Li estimate the ice thickness using OGGM. All authors contributed to writing the paper.

### Competing interests

665 The authors declare that they have no conflict of interest.

### Acknowledgements

This study was supported by grants from the Second Tibetan Plateau Scientific Expedition and Research (STEP) program (2019QZKK0201), the Strategic Priority Research Program (A) of the Chinese academy of Sciences (XDA20060201) and the Natural Science Foundation of China (41871056).

670

### References

- Allen, S.K., Zhang, G., Wang, W., Yao, T., & Bolch, T.: Potentially dangerous glacial lakes across the Tibetan Plateau revealed using a large-scale automated assessment approach. *Sci. Bull.*, 64, 435-445, <https://doi.org/10.1016/j.scib.2019.03.011>, 2019
- 675 Altunel, A.O.: Evaluation of TanDEM-X 90 m Digital Elevation Model. *Int. J. Remote Sens.*, 40, 2841-2854, <https://doi.org/10.1080/01431161.2019.1585593>, 2019
- Bachmann, M., Kraus, T., Bojarski, A., Schandri, M., Boer, J., Busche, T., Bueso Bello, J.L., Grigorov, C., Steinbrecher, U., Buckreuss, S., Krieger, G., & Zink, M.: The TanDEM-X Mission Phases - Ten Years of Bistatic Acquisition and Formation Planning. *IEEE J-STARS*, 1-1, <https://doi.org/10.1109/JSTARS.2021.3065446>, 2021
- 680 Bhambri, R., Bolch, T., & Chaujar, R.K.: Mapping of debris-covered glaciers in the Garhwal Himalayas using ASTER DEMs and thermal data. *Int. J. Remote Sens.*, 32, 8095-8119, <https://doi.org/10.1080/01431161.2010.532821>, 2011
- Brun, F., Berthier, E., Wagnon, P., Kaab, A., & Treichler, D.: A spatially resolved estimate of High Mountain Asia glacier mass balances, 2000-2016. *Nat. Geosci.*, 10, 668-673, <https://doi.org/10.1038/ngeo2999>, 2017



- 685 Brunt, K.M., Neumann, T.A., & Smith, B.E.: Assessment of ICESat-2 Ice Sheet Surface Heights, Based on Comparisons Over  
the Interior of the Antarctic Ice Sheet. *Geophys. Res. Lett.*, 46, 13072-13078, <https://doi.org/10.1029/2019GL084886>, 2019
- [Brunt, K. M., Smith, B. E., Sutterley, T. C., Kurtz, N. T., and Neumann, T. A.: Comparisons of Satellite and Airborne Altimetry  
With Ground-Based Data From the Interior of the Antarctic Ice Sheet, \*Geophys Res Lett\*, 48, e2020GL090572,  
<https://doi.org/10.1029/2020GL090572>, 2021.](https://doi.org/10.1029/2020GL090572)
- 690 Burrough, P.A., & McDonell, R.A.: Principles of Geographical Information Systems. Oxford University Press, New York,  
190 pp., 1988
- Chen, W., Yao, T., Zhang, G., Li, S., & Zheng, G.: Accelerated glacier mass loss in the largest river and lake source regions  
of the Tibetan Plateau and its links with local water balance over 1976–2017. *J. Glaciol.*, 1-15,  
<https://doi.org/10.1017/jog.2021.9>, 2021
- 695 Crippen, R., Buckley, S., Belz, E., Gurrola, E., Hensley, S., Kobrick, M., Lavalley, M., Martin, J., Neumann, M., Nguyen, Q.,  
Rosen, P., Shimada, J., Simard, M., & Tung, W.: NASADEM global elevation model: methods and progress. *Int. Arch.  
Photogramm. Remote Sens. Spatial Inf. Sci.*, XLI-B4, 125–128, <https://doi.org/10.5194/isprs-archives-XLI-B4-125-2016>,  
2016.
- Cuffey, K., & Paterson, W.S.B.: *The Physics of Glaciers* 4th Edition. Academic Press, 2010
- 700 Dehecq, A., Gourmelen, N., Gardner, A.S., Brun, F., Goldberg, D., Nienow, P.W., Berthier, E., Vincent, C., Wagnon, P., &  
Trouvé, E.: Twenty-first century glacier slowdown driven by mass loss in High Mountain Asia. *Nat. Geosci.*, 12, 22–27,  
<https://doi.org/10.1038/s41561-018-0271-9>, 2019
- Fahnestock, M., Scambos, T., Moon, T., Gardner, A., Haran, T., & Klinger, M.: Rapid large-area mapping of ice flow using  
*Landsat 8*. *Remote Sens. Environ.*, 185, 84-94, <https://doi.org/10.1016/j.rse.2015.11.023>, 2016
- 705 Falorni, G.: Analysis and characterization of the vertical accuracy of digital elevation models from the Shuttle Radar  
Topography Mission. *J. Geophys. Res.-Earth*, 110, <https://doi.org/10.1029/2003JF000113>, 2005
- Farinotti, D., Brinkerhoff, D.J., Clarke, G.K.C., Fürst, J.J., Frey, H., Gantayat, P., Gillet-Chaulet, F., Girard, C., Huss, M.,  
Leclercq, P.W., Linsbauer, A., Machguth, H., Martin, C., Maussion, F., Morlighem, M., Mosbeux, C., Pandit, A., Portmann,  
A., Rabatel, A., Ramsankaran, R., Reerink, T.J., Sanchez, O., Stentoft, P.A., Singh Kumari, S., van Pelt, W.J.J., Anderson,  
B., Benham, T., Binder, D., Dowdeswell, J.A., Fischer, A., Helfricht, K., Kutuzov, S., Lavrentiev, I., McNabb, R.,  
710 Gudmundsson, G.H., Li, H., & Andreassen, L.M.: How accurate are estimates of glacier ice thickness? Results from ITMIX,  
the Ice Thickness Models Intercomparison eXperiment. *The Cryosphere*, 11, 949-970, [https://doi.org/10.5194/tc-11-949-  
2017](https://doi.org/10.5194/tc-11-949-2017), 2017
- Farinotti, D., Brinkerhoff, D.J., Fürst, J.J., Gantayat, P., Gillet-Chaulet, F., Huss, M., Leclercq, P.W., Maurer, H., Morlighem,  
M., Pandit, A., Rabatel, A., Ramsankaran, R., Reerink, T.J., Robo, E., Rouges, E., Tamre, E., van Pelt, W.J.J., Werder, M.A.,  
715 Azam, M.F., Li, H., & Andreassen, L.M.: Results from the Ice Thickness Models Intercomparison eXperiment Phase 2  
(ITMIX2). *Front. Earth. Sci.*, 8, [https:// doi: 10.3389/feart.2020.571923](https://doi.org/10.3389/feart.2020.571923), 2021

- Farinotti, D., Huss, M., Bauder, A., Funk, M., & Truffer, M.: A method to estimate the ice volume and ice-thickness distribution of alpine glaciers. *J. Glaciol.*, 55, 422-430, <https://doi.org/10.3189/002214309788816759>, 2009
- 720 Farinotti, D., Huss, M., Furst, J.J., Landmann, J., Machguth, H., Maussion, F., & Pandit, A.: A consensus estimate for the ice thickness distribution of all glaciers on Earth. *Nat. Geosci.*, 12, 168-173, <https://doi.org/10.1038/s41561-019-0300-3>, 2019
- Fielding, E., Isacks, B., Barazangi, M., & Duncan, C.: How flat is Tibet? *Geology*, 22, 163-167, [https://doi.org/10.1130/0091-7613\(1994\)022<0163:HFIT>2.3.CO;2](https://doi.org/10.1130/0091-7613(1994)022<0163:HFIT>2.3.CO;2), 1994
- 725 Frey, H., Machguth, H., Huss, M., Huggel, C., Bajracharya, S., Bolch, T., Kulkarni, A., Linsbauer, A., Salzmann, N., & Stoffel, M.: Estimating the volume of glaciers in the Himalayan–Karakoram region using different methods. *The Cryosphere*, 8, 2313-2333, <https://doi.org/10.5194/tc-8-2313-2014>, 2014
- Frey, H., & Paul, F.: On the suitability of the SRTM DEM and ASTER GDEM for the compilation of topographic parameters in glacier inventories. *Int. J. Appl. Earth. Obs.*, 18, 480-490, <https://doi.org/10.1016/j.jag.2011.09.020>, 2012
- Frey, H., Paul, F., & Strozzi, T.: Compilation of a glacier inventory for the western Himalayas from satellite data: methods, challenges, and results. *Remote Sens. Environ.*, 124, 832-843, <https://doi.org/10.1016/j.rse.2012.06.020>, 2012
- 730 Fujita, K., Suzuki, R., Nuimura, T., & Sakai, A.: Performance of ASTER and SRTM DEMs, and their potential for assessing glacial lakes in the Lunana region, Bhutan Himalaya. *J. Glaciol.*, 54, 220-228, <https://doi.org/10.3189/002214308784886162>, 2017
- Furian, W., Loibl, D., & Schneider, C.: Future glacial lakes in High Mountain Asia: an inventory and assessment of hazard potential from surrounding slopes. *J. Glaciol.*, 1-18, <https://doi.org/10.1017/jog.2021.18>, 2021
- 735 Gantayat, P., Kulkarni, A.V., & Srinivasan, J.: Estimation of ice thickness using surface velocities and slope: case study at Gangotri Glacier, India. *J. Glaciol.*, 60, 277-282, <https://doi.org/10.3189/2014JoG13J078>, 2014
- Gardner, A.S., M. A. Fahnestock, and T. A. Scambos.: ITS\_LIVE Regional Glacier and Ice Sheet Surface Velocities. Data archived at National Snow and Ice Data Center, 2019
- 740 Gdulová, K., Marešová, J., & Moudrý, V.: Accuracy assessment of the global TanDEM-X digital elevation model in a mountain environment. *Remote Sens. Environ.*, 241, <https://doi.org/10.1016/j.rse.2020.111724>, 2020
- Glen, J.W.: The Creep of Polycrystalline Ice. *Proceedings of the Royal Society A: Mathematical, Physical and Engineering Sciences*, 228, 519-538, <https://doi.org/10.1098/rspa.1955.0066>, 1955
- 745 González-Moradas, M.d.R., & Viveen, W.: Evaluation of ASTER GDEM2, SRTMv3.0, ALOS AW3D30 and TanDEM-X DEMs for the Peruvian Andes against highly accurate GNSS ground control points and geomorphological-hydrological metrics. *Remote Sens. Environ.*, 237, <https://doi.org/10.1016/j.rse.2019.111509>, 2020
- González, P.J., & Fernández, J.: Error estimation in multitemporal InSAR deformation time series, with application to Lanzarote, Canary Islands. *J. Geophys. Res.-Sol. Ea.*, 116, <https://doi.org/10.1029/2011JB008412>, 2011
- Gorokhovich, Y., & Voustantiouk, A.: Accuracy assessment of the processed SRTM-based elevation data by CGIAR using field data from USA and Thailand and its relation to the terrain characteristics. *Remote Sens. Environ.*, 104, 409-415, 2006

- 750 Grohmann, C.H.: Evaluation of TanDEM-X DEMs on selected Brazilian sites: Comparison with SRTM, ASTER GDEM and ALOS AW3D30. *Remote Sens. Environ.*, 212, 121-133, <https://doi.org/10.1016/j.rse.2006.05.012>, 2018
- Han, H., Zeng, Q., & Jiao, J.: Quality Assessment of TanDEM-X DEMs, SRTM and ASTER GDEM on Selected Chinese Sites. *Remote Sen.-Basel*, 13, <https://doi.org/10.3390/rs13071304>, 2021
- Hawker, L., Neal, J., & Bates, P.: Accuracy assessment of the TanDEM-X 90 Digital Elevation Model for selected floodplain  
755 sites. *Remote Sens. Environ.*, 232, 111724-111738, <https://doi.org/10.1016/j.rse.2019.111319>, 2019
- Höhle, J., & Höhle, M.: Accuracy assessment of digital elevation models by means of robust statistical methods. *ISPRS J. Photogramm.*, 64, 398-406, <https://doi.org/10.1016/j.isprsjprs.2009.02.003>, 2009
- Hugonnet, R., McNabb, R., Berthier, E., Menounos, B., Nuth, C., Girod, L., Farinotti, D., Huss, M., Dussaillant, I., Brun, F., & Kääb, A.: Accelerated global glacier mass loss in the early twenty-first century. *Nature*, 592, 726-731,  
760 <https://doi.org/10.1038/s41586-021-03436-z>, 2021
- Huss, M.: Density assumptions for converting geodetic glacier volume change to mass change. *The Cryosphere*, 7, 877-887, Density assumptions for converting geodetic glacier volume change to mass change, 2013
- Huss, M., & Farinotti, D.: Distributed ice thickness and volume of all glaciers around the globe. *J. Geophys. Res.-Sol. Ea.*, 117, 1-10, <https://doi.org/10.1029/2012JF002523>, 2012
- 765 Huss, M., & Hock, R.: Global-scale hydrological response to future glacier mass loss. *Nat. Clim. Change.*, 8, 135-140, <https://doi.org/10.1038/s41558-017-0049-x>, 2018
- Immerzeel, W.W., Lutz, A.F., Andrade, M., Bahl, A., Biemans, H., Bolch, T., Hyde, S., Brumby, S., Davies, B.J., Elmore, A.C., Emmer, A., Feng, M., Fernandez, A., Haritashya, U., Kargel, J.S., Koppes, M., Kraaijenbrink, P.D.A., Kulkarni, A.V., Mayewski, P.A., Nepal, S., Pacheco, P., Painter, T.H., Pellicciotti, F., Rajaram, H., Rupper, S., Sinisalo, A., Shrestha, A.B.,  
770 Viviroli, D., Wada, Y., Xiao, C., Yao, T., & Baillie, J.E.M.: Importance and vulnerability of the world's water towers. *Nature*, 577, 364-369, <https://doi.org/10.1038/s41586-019-1822-y>, 2020
- Kääb, A.: Combination of SRTM3 and repeat ASTER data for deriving alpine glacier flow velocities in the Bhutan Himalaya. *Remote Sens. Environ.*, 94, 463-474, <https://doi.org/10.1016/j.rse.2004.11.003>, 2005
- Kääb, A., Leinss, S., Gilbert, A., Bühler, Y., Gascoïn, S., Evans, S.G., Bartelt, P., Berthier, E., Brun, F., Chao, W.-A., Farinotti,  
775 D., Gimbert, F., Guo, W., Huggel, C., Kargel, J.S., Leonard, G.J., Tian, L., Treichler, D., & Yao, T.: Massive collapse of two glaciers in western Tibet in 2016 after surge-like instability. *Nat. Geosci.*, 11, 114-120, <https://doi.org/10.1038/s41561-017-0039-7>, 2018
- Kaser, G., Grosshauser, M., & Marzeion, B.: Contribution potential of glaciers to water availability in different climate regimes. *Proc. Natl. Acad. Sci. USA*, 107, 20223-20227, <https://doi.org/10.1073/pnas.1008162107>, 2010
- 780 Ke, L., Ding, X., Zhang, L.E.I., Hu, J.U.N., Shum, C.K., & Lu, Z.: Compiling a new glacier inventory for southeastern Qinghai-Tibet Plateau from Landsat and PALSAR data. *J. Glaciol.*, 62, 579-592, <https://doi.org/10.1017/jog.2016.58>, 2016
- Kienholz, C., Rich, J.L., Arendt, A.A., & Hock, R.: A new method for deriving glacier centerlines applied to glaciers in Alaska and northwest Canada. *The Cryosphere*, 8, 503-519, <https://doi.org/10.5194/tc-8-503-2014>, 2014

- 785 [Koldtoft, I., Grinsted, A., Vinther, B., & Hvidberg, C.: Ice thickness and volume of the Renland Ice Cap, East Greenland. \*J. Glaciol.\*, 67\(264\), 714-726. doi:10.1017/jog.2021.11, 2021](#)
- Kraaijenbrink, P.D.A., Bierkens, M.F.P., Lutz, A.F., & Immerzeel, W.W.: Impact of a global temperature rise of 1.5 degrees Celsius on Asia's glaciers. *Nature*, 549, 257-260, <https://doi.org/10.1038/nature23878>, 2017
- Li, G., & Lin, H.: Recent decadal glacier mass balances over the Western Nyainqentanglha Mountains and the increase in their melting contribution to Nam Co Lake measured by differential bistatic SAR interferometry. *Global Planet. Change*, 149, 177-190, <https://doi.org/10.1016/j.gloplacha.2016.12.018>, 2017
- 790 [Li, R., Li, H., Hao, T., Qiao, G., Cui, H., He, Y., Hai, G., Xie, H., Cheng, Y., and Li, B.: Assessment of ICESat-2 ice surface elevations over the Chinese Antarctic Research Expedition \(CHINARE\) route, East Antarctica, based on coordinated multi-sensor observations. \*The Cryosphere\*, 15, 3083–3099, <https://doi.org/10.5194/tc-15-3083-2021>, 2021.](#)
- Li, S., Yao, T., Yang, W., Yu, W., & Zhu, M.: Glacier Energy and Mass Balance in the Inland Tibetan Plateau: Seasonal and Interannual Variability in Relation to Atmospheric Changes. *J. Geophys. Res.-Atmos.*, 123, 6390-6409, <https://doi.org/10.1029/2017JD028120>, 2018
- 795 Linsbauer, A., Frey, H., Haerberli, W., Machguth, H., Azam, M.F., & Allen, S.: Modelling glacier-bed overdeepenings and possible future lakes for the glaciers in the Himalaya—Karakoram region. *Ann. Glaciol.*, 57, 119-130, <https://doi.org/10.3189/2016AoG71A627>, 2016
- 800 Linsbauer, A., Paul, F., & Haerberli, W.: Modeling glacier thickness distribution and bed topography over entire mountain ranges with GlabTop: Application of a fast and robust approach. *J. Geophys. Res.-Sol. Ea.*, 117, 1-17, <https://doi.org/10.1029/2011JF002313>, <https://doi.org/10.1016/j.geomorph.2019.04.012>, 2012
- Liu, K., Song, C., Ke, L., Jiang, L., Pan, Y., & Ma, R.: Global open-access DEM performances in Earth's most rugged region High Mountain Asia: A multi-level assessment. *Geomorphology*, 338, 16-26, <https://doi.org/10.1016/j.geomorph.2019.04.012>, 2019
- 805 [Magruder, L. A., Brunt, K. M., and Alonzo, M.: Early ICESat-2 on-orbit geolocation validation using ground-based corner cube retroreflectors. \*Remote Sensing\*, 12, 3653, <https://doi.org/10.3390/rs12213653>, 2020.](#)
- Maurer, J.M., Schaefer, J.M., Rupper, S., & Corley, A. Acceleration of ice loss across the Himalayas over the past 40 years. *Sci. Adv.*, 5, eaav7266, <https://doi.org/10.1126/sciadv.aav7266>, 2019
- 810 Maussion, F., Butenko, A., Champollion, N., Dusch, M., Eis, J., Fourteau, K., Gregor, P., Jarosch, A.H., Landmann, J., Oesterle, F., Recinos, B., Rothenpieler, T., Vlug, A., Wild, C.T., & Marzeion, B.: The Open Global Glacier Model (OGGM) v1.1. *Geosci. Model. Dev.*, 12, 909-931, <https://doi.org/10.5194/gmd-12-909-2019>, 2019
- Maussion, F., Scherer, D., Mölg, T., Collier, E., Curio, J., & Finkelnburg, R. Precipitation Seasonality and Variability over the Tibetan Plateau as Resolved by the High Asia Reanalysis. *J. Climate*, 27, 1910-1927, <https://doi.org/10.1175/JCLI-D-13-00282.1>, 2014
- 815

- Mölg, N., Bolch, T., Rastner, P., Strozzi, T., & Paul, F.: A consistent glacier inventory for Karakoram and Pamir derived from Landsat data: distribution of debris cover and mapping challenges. *Earth Syst. Sci. Data*, 10, 1807-1827, <https://doi.org/10.5194/essd-10-1807-2018>, 2018
- 820 Mukherjee, S., Joshi, P.K., Mukherjee, S., Ghosh, A., Garg, R.D., & Mukhopadhyay, A. Evaluation of vertical accuracy of open source Digital Elevation Model (DEM). *Int. J. Appl. Earth. Obs.*, 21, 205-217, <https://doi.org/10.1016/j.jag.2012.09.004>, 2013
- Nuth, C., & Kääb, A.: Co-registration and bias corrections of satellite elevation data sets for quantifying glacier thickness change. *The Cryosphere*, 5, 271-290, <https://doi.org/10.5194/tc-5-271-2011>, 2011
- 825 Paul, F., & Linsbauer, A.: Modeling of glacier bed topography from glacier outlines, central branch lines, and a DEM. *Int. J. Geogr. Inf. Sci.*, 26, 1173-1190, <https://doi.org/10.1080/13658816.2011.627859>, 2012
- Pelto, B.M., Maussion, F., Menounos, B., Radić, V., & Zeuner, M.: Bias-corrected estimates of glacier thickness in the Columbia River Basin, Canada. *J. Glaciol.*, 66, 1051-1063, <https://doi.org/10.1017/jog.2020.75>, 2020
- Ramsankaran, R., Pandit, A., & Azam, M.: Spatially distributed ice-thickness modelling for Chhota Shigri Glacier in western Himalayas, India. *Int. J. Remote Sens.*, 39, 3320-3343, <https://doi.org/10.1080/01431161.2018.1441563>, 2018
- 830 Rankl, M., & Braun, M.: Glacier elevation and mass changes over the central Karakoram region estimated from TanDEM-X and SRTM/X-SAR digital elevation models. *Ann. Glaciol.*, 57, 273-281, <https://doi.org/10.3189/2016AoG71A024>, 2016
- Reuter, H.I., Nelson, A., & Jarvis, A.: An evaluation of void-filling interpolation methods for SRTM data. *Int. J. Geogr. Inf. Sci.*, 21, 983-1008, <https://doi.org/10.1080/13658810601169899>, 2007
- Scambos, T., M. Fahnestock, T. Moon, A. Gardner, and M. Klinger.: Global Land Ice Velocity Extraction from Landsat 8 (GoLIVE), Version 1. Boulder, Colorado USA. NSIDC: National Snow and Ice Data Center, 2016
- 835 Shean, D.E.: High Mountain Asia 8-meter DEM Mosaics Derived from Optical Imagery, Version 1. Boulder, Colorado USA. NASA National Snow and Ice Data Center Distributed Active Archive Center, 2017
- Shean, D.E., Bhushan, S., Montesano, P., Rounce, D.R., Arendt, A., & Osmanoglu, B.: A Systematic, Regional Assessment of High Mountain Asia Glacier Mass Balance. *Front. Earth. Sci.*, 7, <https://doi.org/10.3389/feart.2019.00363>, 2020
- 840 Shortridge, A., & Messina, J.: Spatial structure and landscape associations of SRTM error. *Remote Sens. Environ.*, 115, 1576-1587, <https://doi.org/10.1016/j.rse.2011.02.017>, 2011
- Smith, B., Fricker, H.A., Holschuh, N., Gardner, A.S., Adusumilli, S., Brunt, K.M., Csatho, B., Harbeck, K., Huth, A., Neumann, T., Nilsson, J., & Siegfried, M.R.: Land ice height-retrieval algorithm for NASA's ICESat-2 photon-counting laser altimeter. *Remote Sens. Environ.*, 233, <https://doi.org/10.1016/j.rse.2019.111352>, 2019
- 845 Takaku, J., Tadono, T., Doutsu, M., Ohgushi, F., & Kai, H.: Updates of 'Aw3d30' Alos Global Digital Surface Model with Other Open Access Datasets. *Int. Arch. Photogramm.*, -XLIII-B4-2020, 183-189, <https://doi.org/10.5194/isprs-archives-XLIII-B4-2020-183-2020>, 2020

- Thompson, L.G., Yao, T., Davis, M.E., Mosley-Thompson, E., Wu, G., Porter, S.E., Xu, B., Lin, P.-N., Wang, N., Beaudon, E., Duan, K., Sierra-Hernández, M.R., & Kenny, D.V.: Ice core records of climate variability on the Third Pole with emphasis on the Guliya ice cap, western Kunlun Mountains. *Quaternary. Sci. Rev.*, 188, 1-14, 2018
- 850 Uuementa, E., Ahi, S., Montibeller, B., Muru, M., & Kmoch, A.: Vertical Accuracy of Freely Available Global Digital Elevation Models (ASTER, AW3D30, MERIT, TanDEM-X, SRTM, and NASADEM). *Remote Sens.-Basel*, 12, <https://doi.org/10.1016/j.quascirev.2018.03.003>, <https://doi.org/10.1016/j.rse.2007.11.003>, 2020
- Van Niel, T.G., McVicar, T.R., Li, L., Gallant, J.C., & Yang, Q.: The impact of misregistration on SRTM and DEM image differences. *Remote Sens. Environ.*, 112, 2430-2442, <https://doi.org/10.1016/j.rse.2007.11.003>, 2008
- 855 Welty, E., Zemp, M., Navarro, F., Huss, M., Fürst, J.J., Gärtner-Roer, I., Landmann, J., Machguth, H., Naegeli, K., Andreassen, L.M., Farinotti, D., & Li, H.: Worldwide version-controlled database of glacier thickness observations. *Earth System Science Data*, 12, 3039-3055, <https://doi.org/10.5194/essd-12-3039-2020>, 2020
- Wessel, B., Huber, M., Wohlfart, C., Marschalk, U., Kosmann, D., & Roth, A.: Accuracy assessment of the global TanDEM-X Digital Elevation Model with GPS data. *ISPRS J. Photogramm.*, 139, 171-182, <https://doi.org/10.1016/j.isprsjprs.2018.02.017>, 2018
- 860 Wu, K., Liu, S., Zhu, Y., Liu, Q., & Jiang, Z.: Dynamics of glacier surface velocity and ice thickness for maritime glaciers in the southeastern Tibetan Plateau. *J. Hydrol.*, 590, <https://doi.org/10.1016/j.jhydrol.2020.125527>, 2020
- Yamazaki, D., Ikeshima, D., Tawatari, R., Yamaguchi, T., O'Loughlin, F., Neal, J.C., Sampson, C.C., Kanae, S., & Bates, P.D.: A high-accuracy map of global terrain elevations. *Geophys. Res. Lett.*, 44, 5844-5853, <https://doi.org/10.1002/2017GL072874>, 2017
- 865 Yao, T., Thompson, L.G., Mosbrugger, V., Zhang, F., Ma, Y., Luo, T., Xu, B., Yang, X., Joswiak, D.R., Wang, W., Joswiak, M.E., Devkota, L.P., Tayal, S., Jilani, R., & Fayziev, R.: Third Pole Environment (TPE). *Environ. Dev.*, 3, 52-64, 2012
- Zhang, G., Bolch, T., Allen, S., Linsbauer, A., Chen, W., & Wang, W.: Glacial lake evolution and glacier-lake interactions in the Poiqu River basin, central Himalaya, 1964–2017. *J. Glaciol.*, 65, 347-365, <https://doi.org/10.1016/j.envdev.2012.04.002>, 2019
- 870 Zhang, G., Yao, T., Xie, H., Kang, S., & Lei, Y.: Increased mass over the Tibetan Plateau: From lakes or glaciers? *Geophys. Res. Lett.*, 40, 2125-2130, <https://doi.org/10.1002/grl.50462>, 2013
- [Zhang, Y., Pang, Y., Cui, D., Ma, Y., & Chen, L.: Accuracy Assessment of the ICESat-2/ATL06 Product in the Qilian Mountains Based on CORS and UAV Data. \*IEEE J-STARS\*, 14, 1558-1571, <https://doi.org/10.1109/JSTARS.2020.3044463>, 2020](https://doi.org/10.1109/JSTARS.2020.3044463)
- 875 Zheng, G., Allen, S.K., Bao, A. M., Juan, A. B., Matthias, H., Zhang, G. Q., Li, J. L., Ye, Y., Jiang, L. L., Yu, T., Chen, W.F., & Stoffel, M.: Increasing risk of glacial lake outburst floods from future Third Pole deglaciation. *Nat. Clim. Change.*, 11, 411–417, <https://doi.org/10.1038/s41558-021-01028-3>, 2021

880 Zhou, Y., Li, Z., Li, J., Zhao, R., & Ding, X.: Glacier mass balance in the Qinghai–Tibet Plateau and its surroundings from the mid-1970s to 2000 based on Hexagon KH-9 and SRTM DEMs. *Remote Sens. Environ.*, 210, 96-112, <https://doi.org/10.1016/j.rse.2018.03.020>, 2018
